# Supplementary material for: Eight New Peptaibols from Sponge-Associated Trichoderma atroviride
Source: PubMed Central journal article supplement (PMC3877895; doi:10.3390/md11124937), 2013-12-11
Supplement: marinedrugs-11-04937-s001.pdf [file marinedrugs-11-04937-s001.pdf]

# Supplementary Materials

## NMR Spectra of the New Compounds

Figure S1.  $^1\text{H}$  spectrum of TA1938 (1).

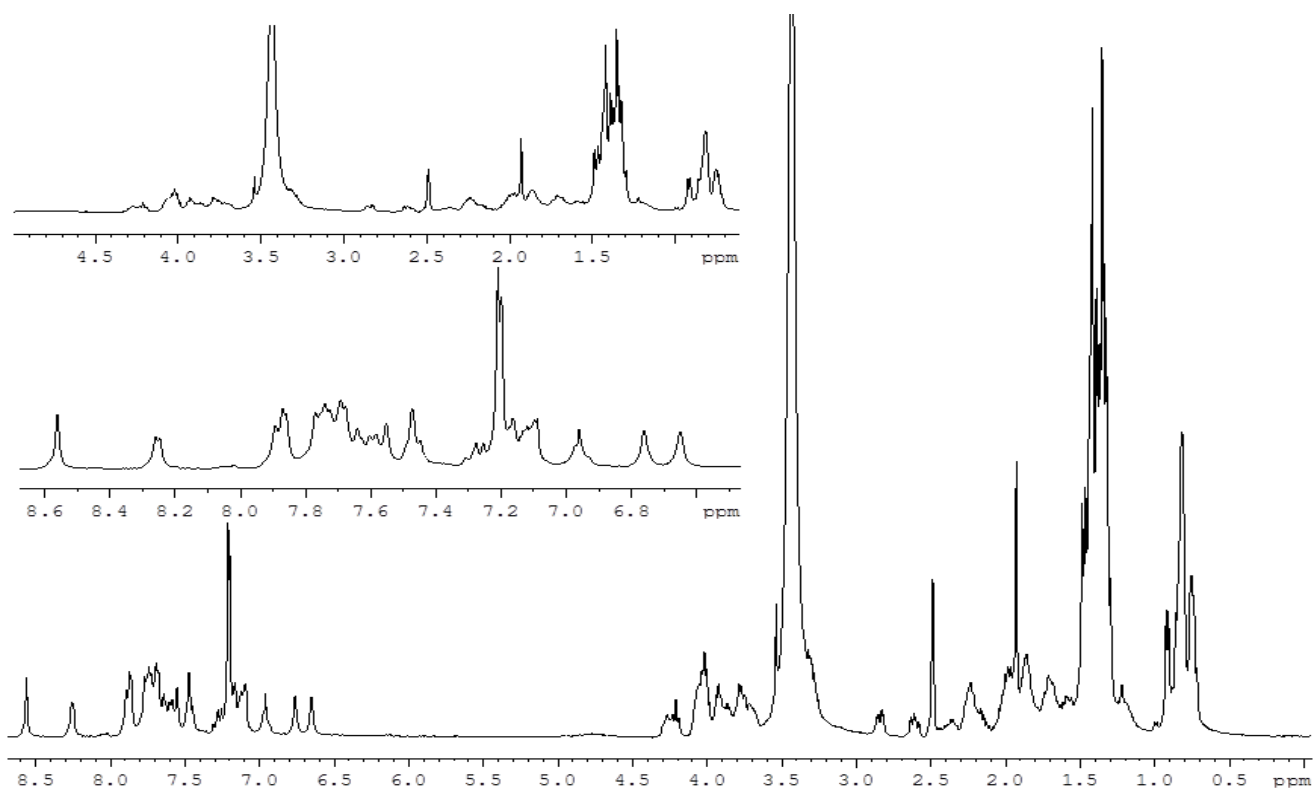

Figure S2.  $^{13}\text{C}$  spectrum of TA1938 (1).

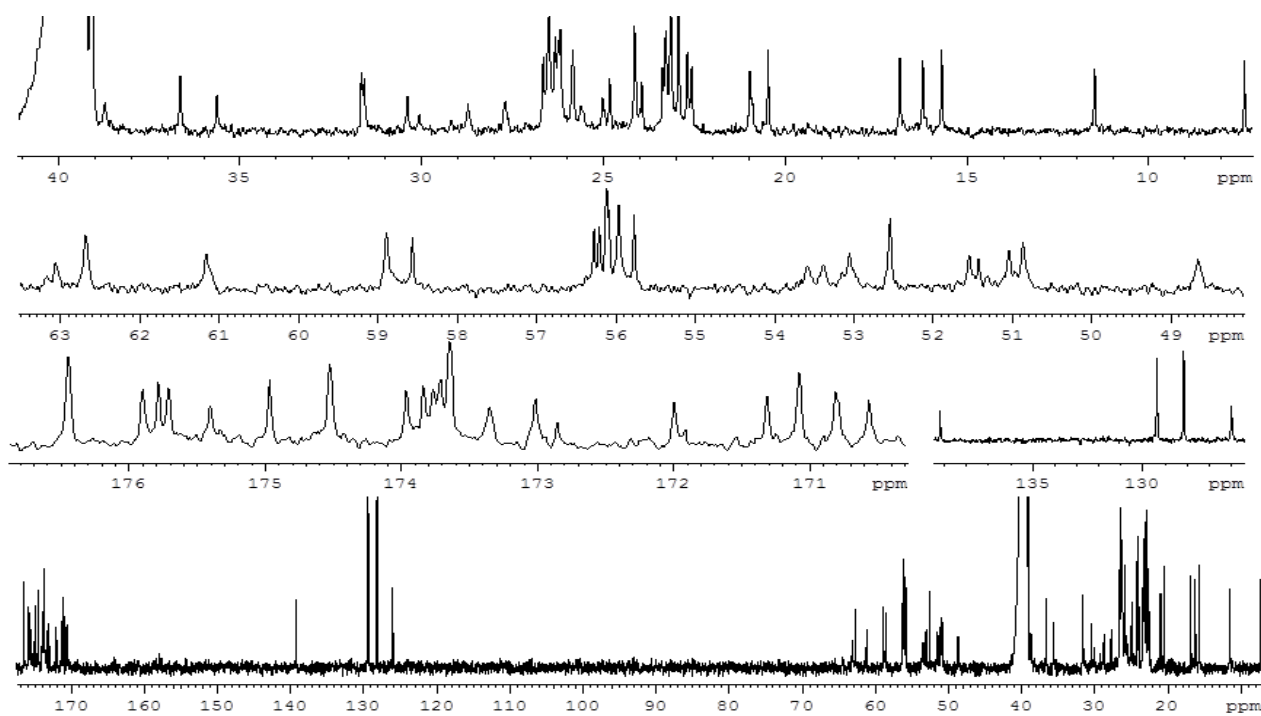

Figure S3. HSQC spectrum of TA1938 (1).

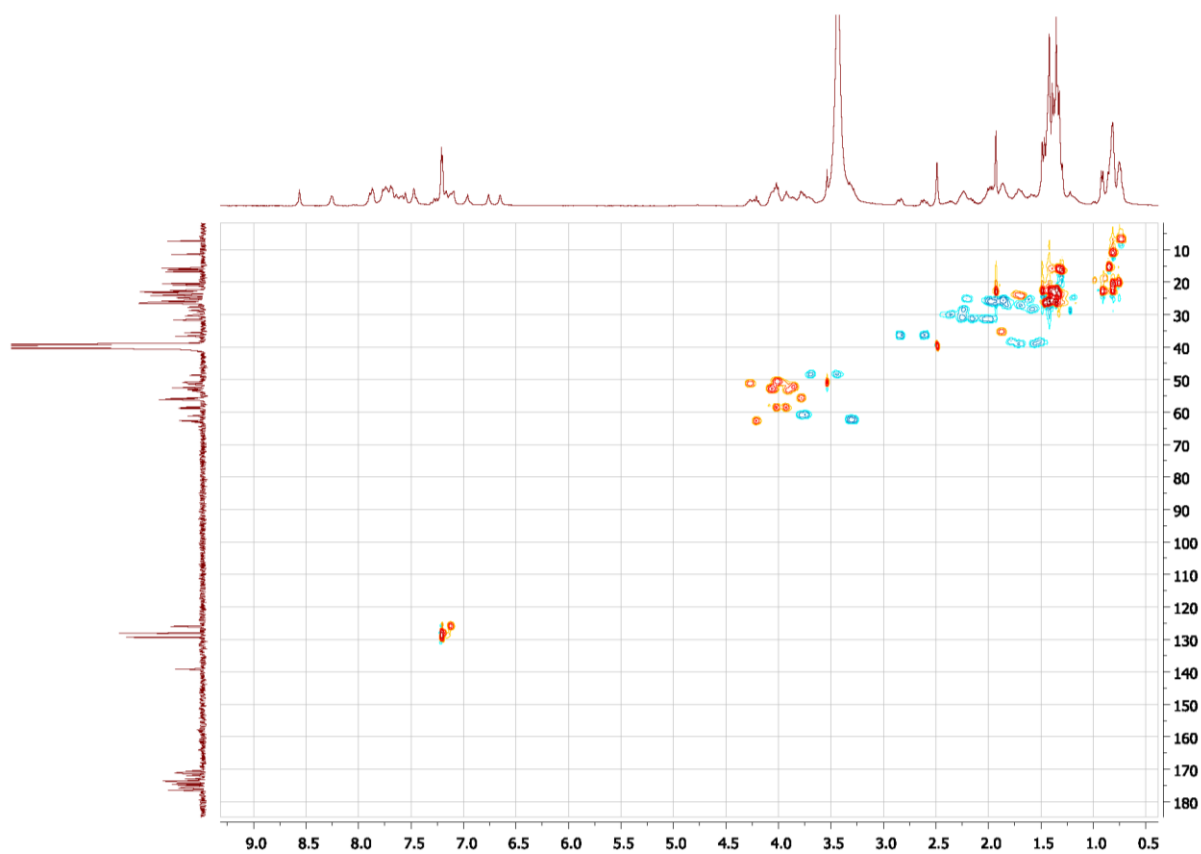

Figure S4. HMBC spectrum of TA1938 (1).

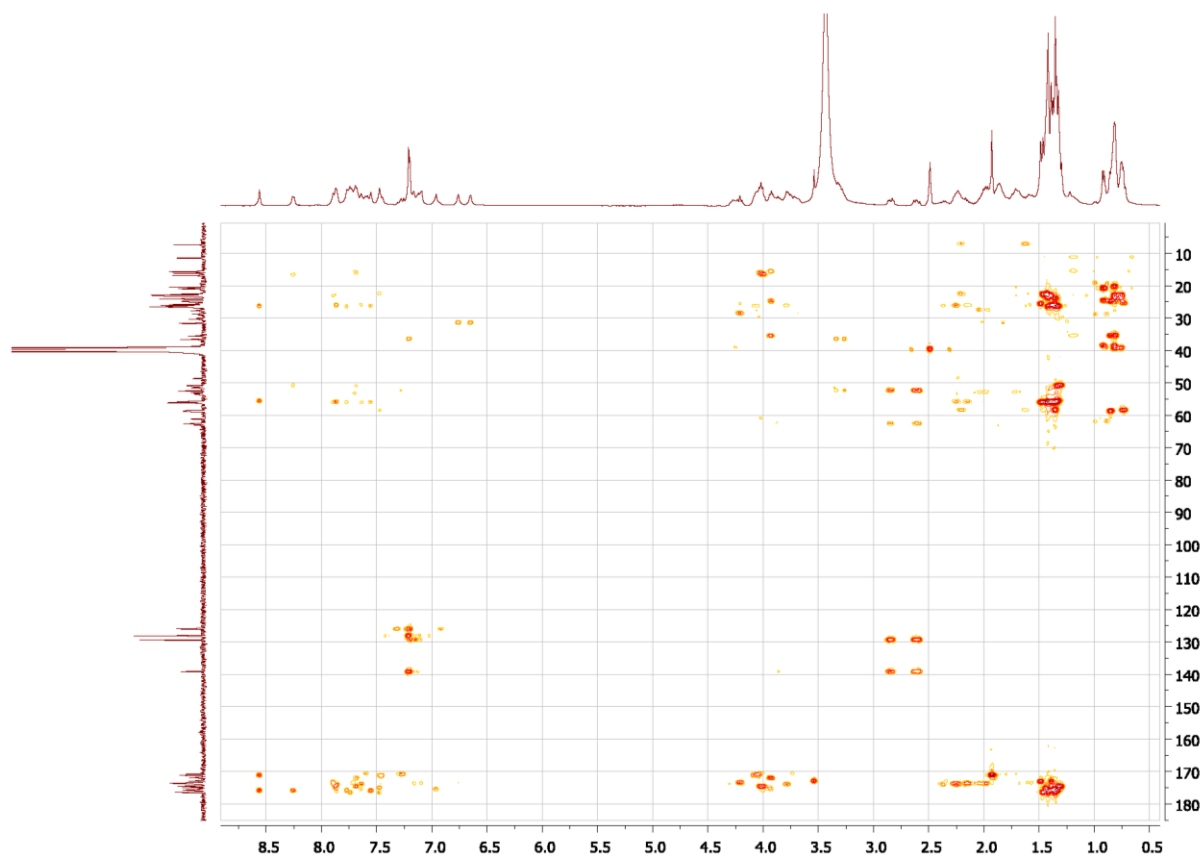

Figure S5. COSY spectrum of TA1938 (1).

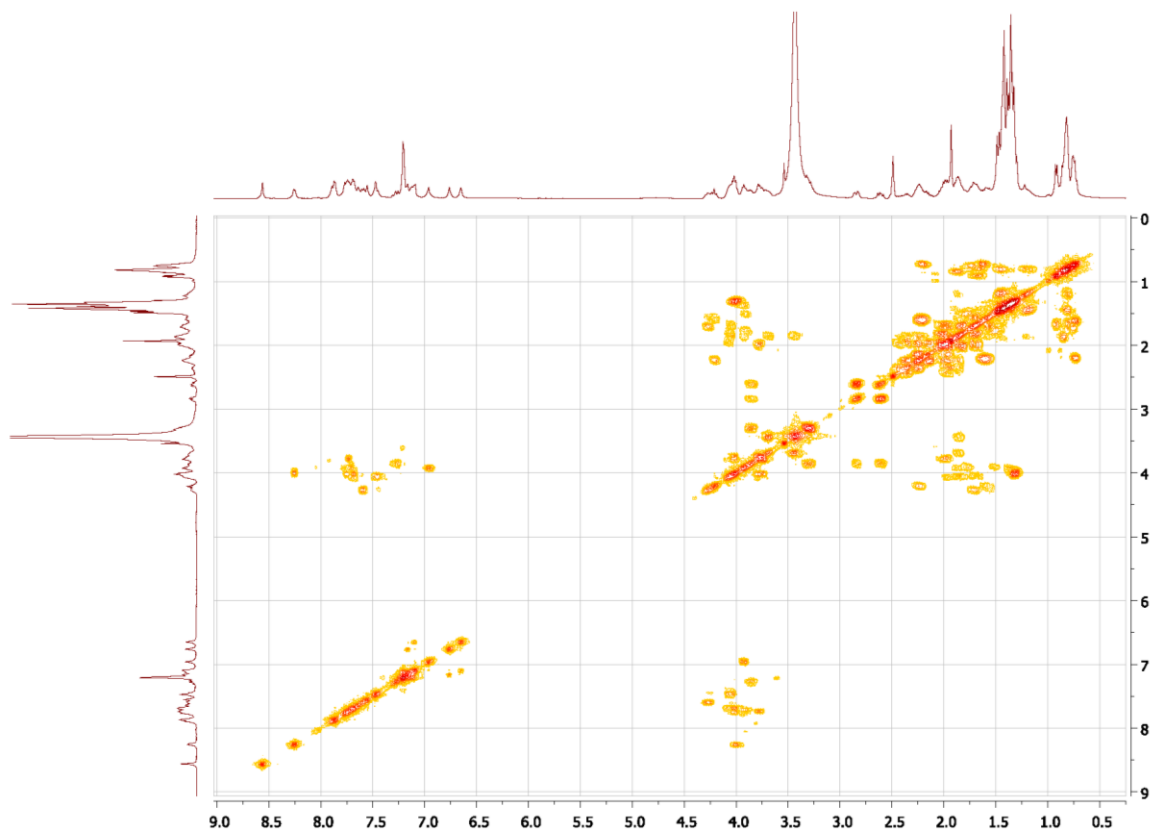

Figure S6. ROESY spectrum of TA1938 (1).

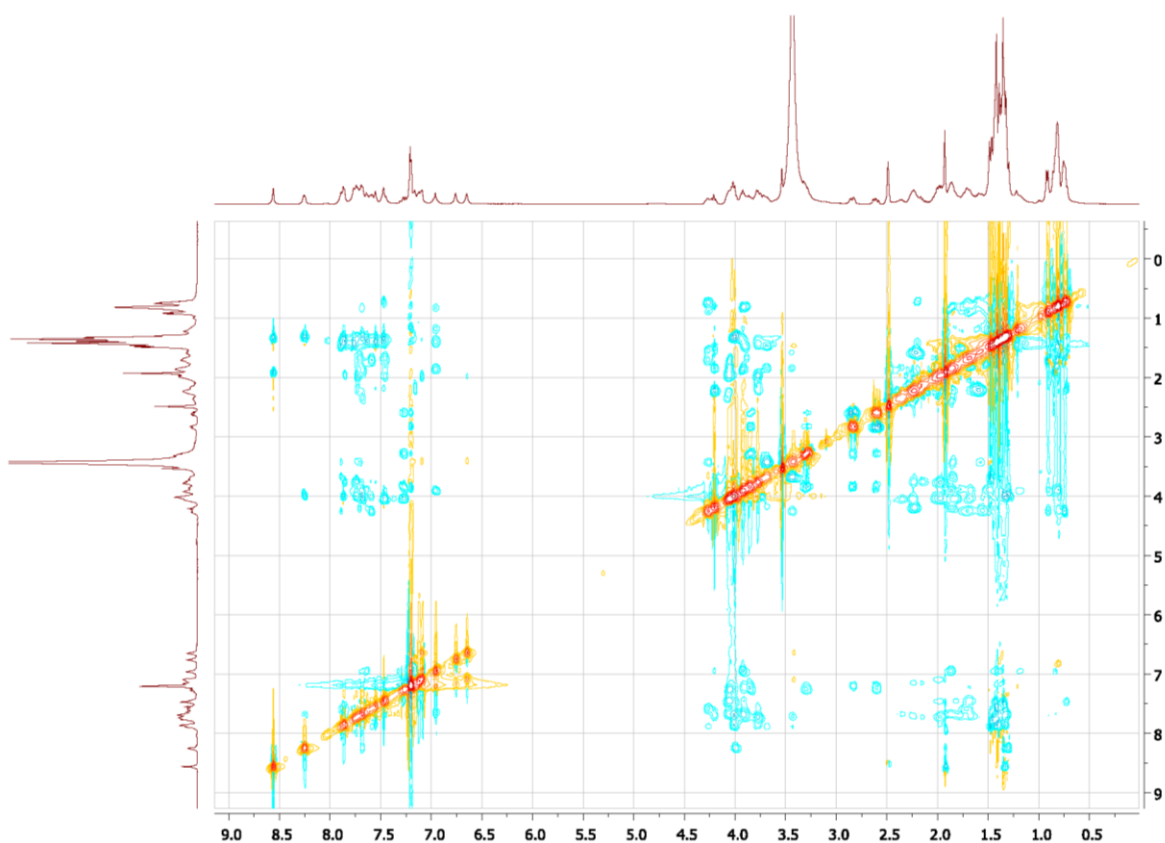

**Figure S7.** Secondary MS fragmentation of the TA1909 (2) ions at  $m/z$  1094.6 (A) and  $m/z$  838.8 (B).

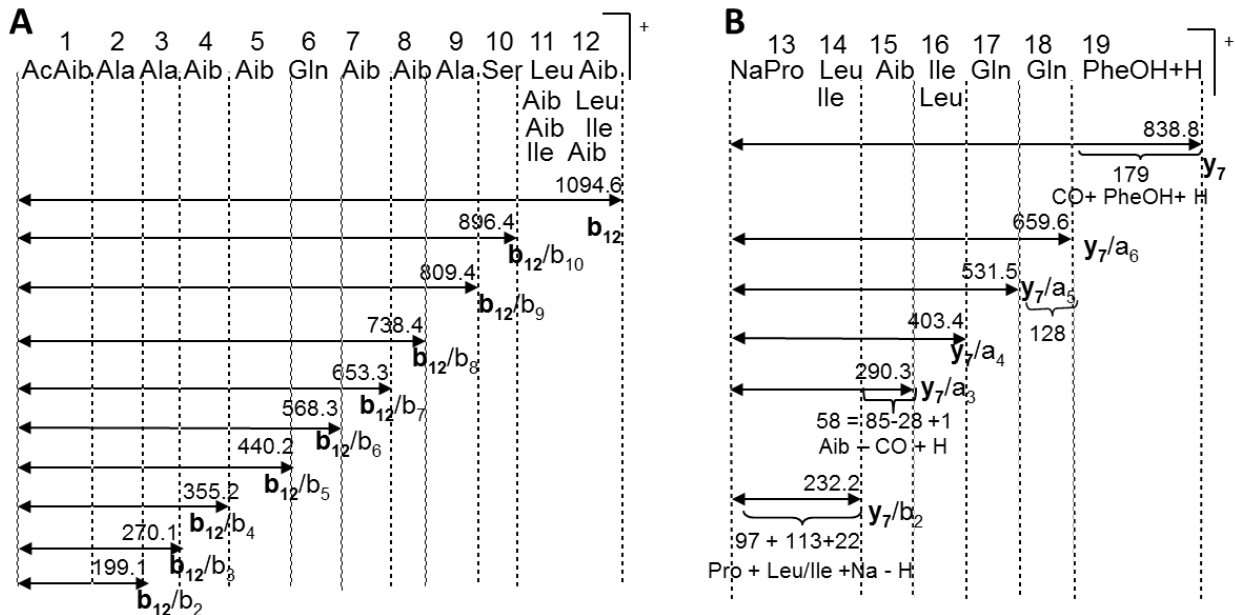

**Figure S8.** Secondary MS fragmentation of the TA1895 (3) ions at  $m/z$  1094.6 (A) and  $m/z$  802.5 (B).

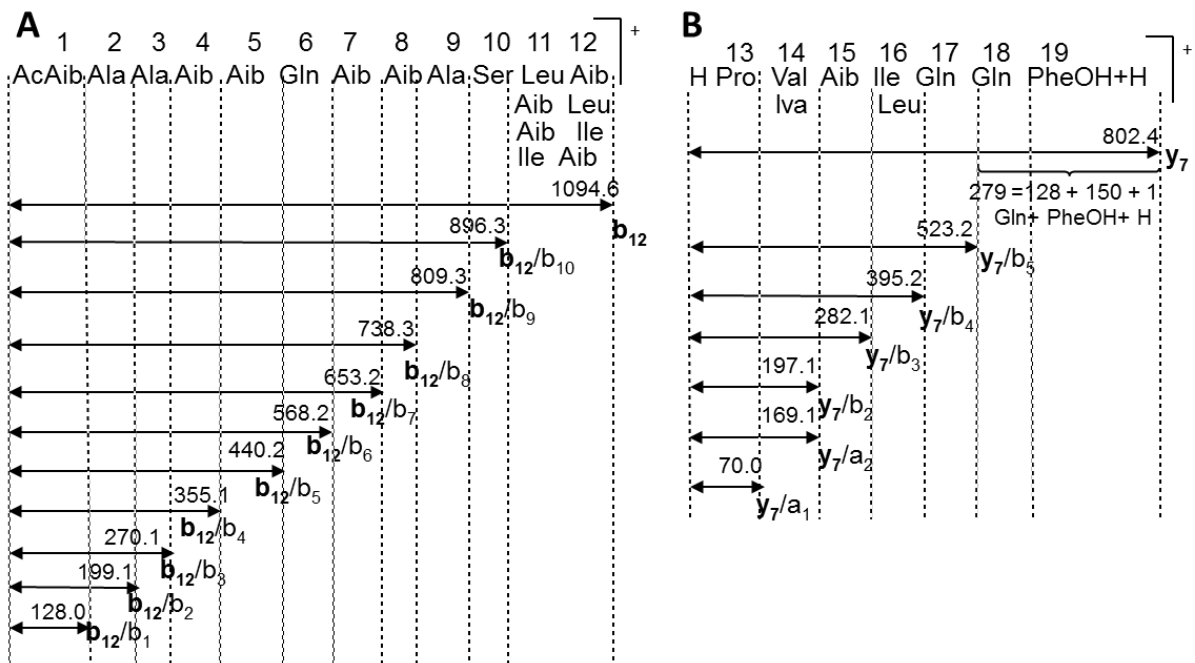

**Figure S9.** Secondary MS fragmentation of the TA1896 (4) ions at  $m/z$  1094.6 (A) and  $m/z$  817.4 (B).

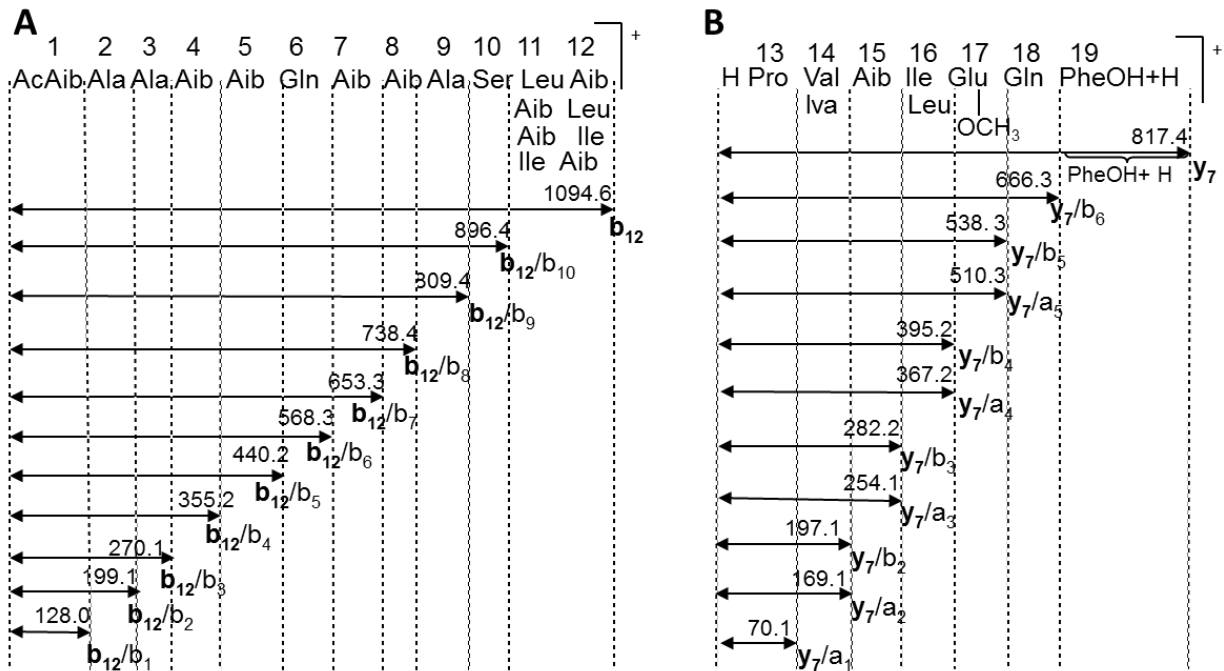

**Figure S10.** Secondary MS fragmentation of the TA1924 (5) ions at  $m/z$  1122.7 (A) and  $m/z$  817.7 (B).

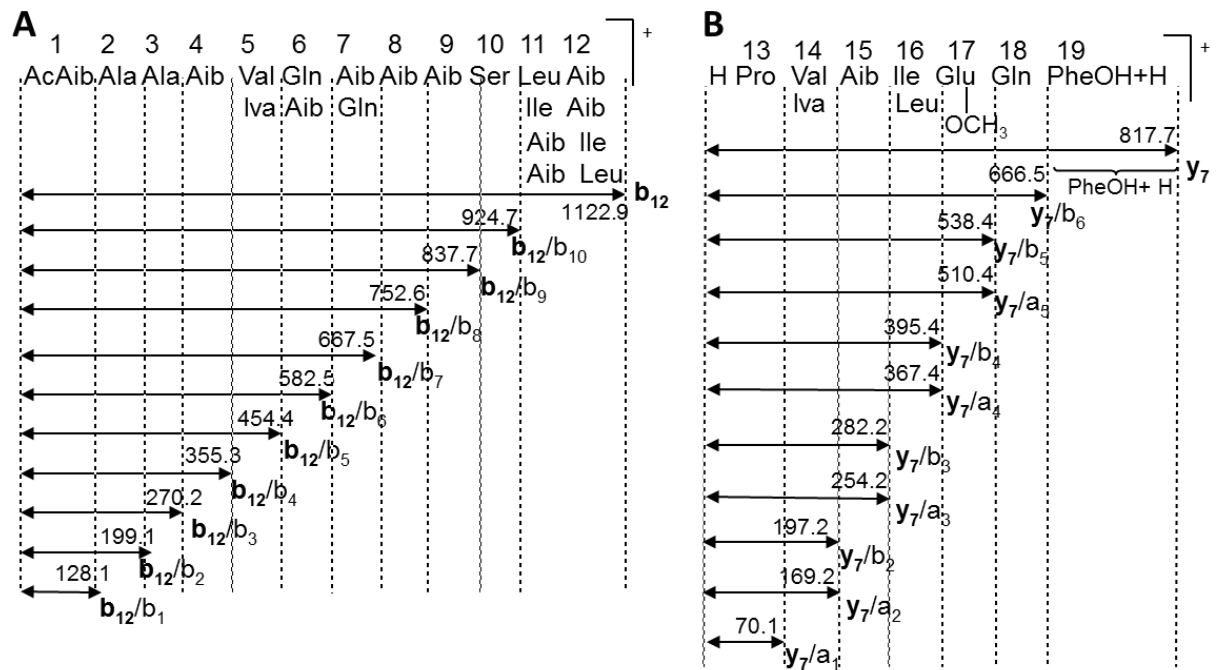



**Figure S13.** Secondary MS fragmentation of the TA1909a (**8**) ions at  $m/z$  1108.5 (A) and  $m/z$  824.4 (B).

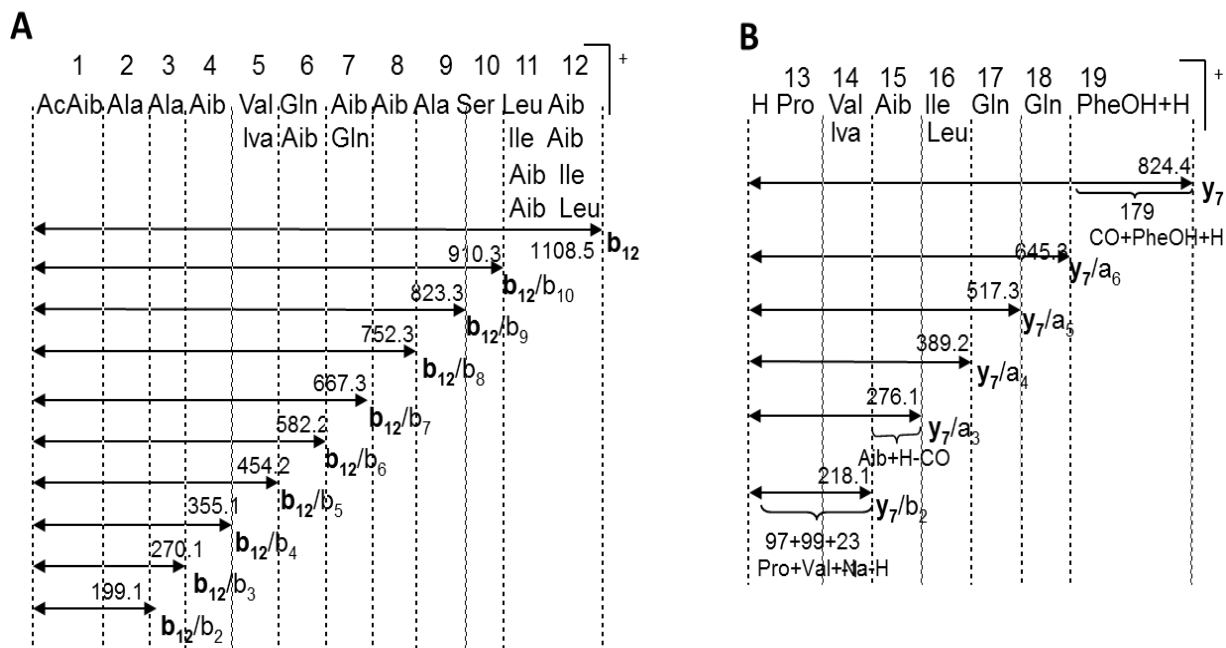

**Figure S14.** Secondary MS fragmentation of the TA.VIa (**10**) ions at  $m/z$  1122.9 (A) and  $m/z$  816.5 (B).

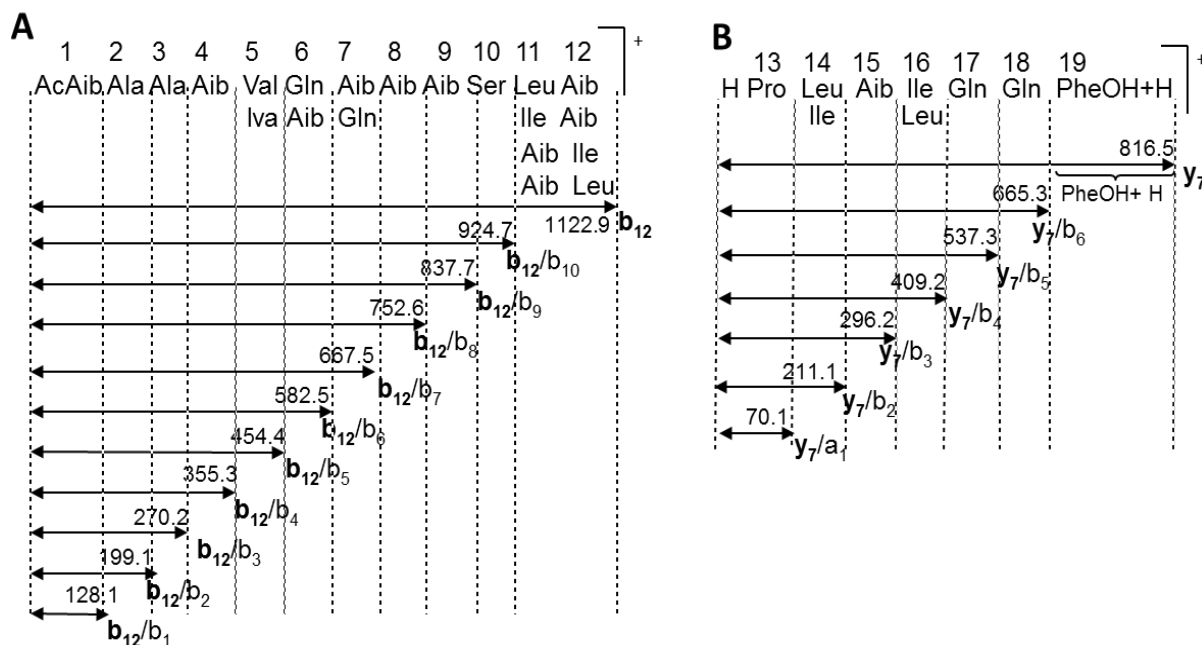

**Figure S15.** Secondary MS fragmentation of the TA.VII (11) ions at  $m/z$  1122.8 (A) and  $m/z$  802.4 (B).

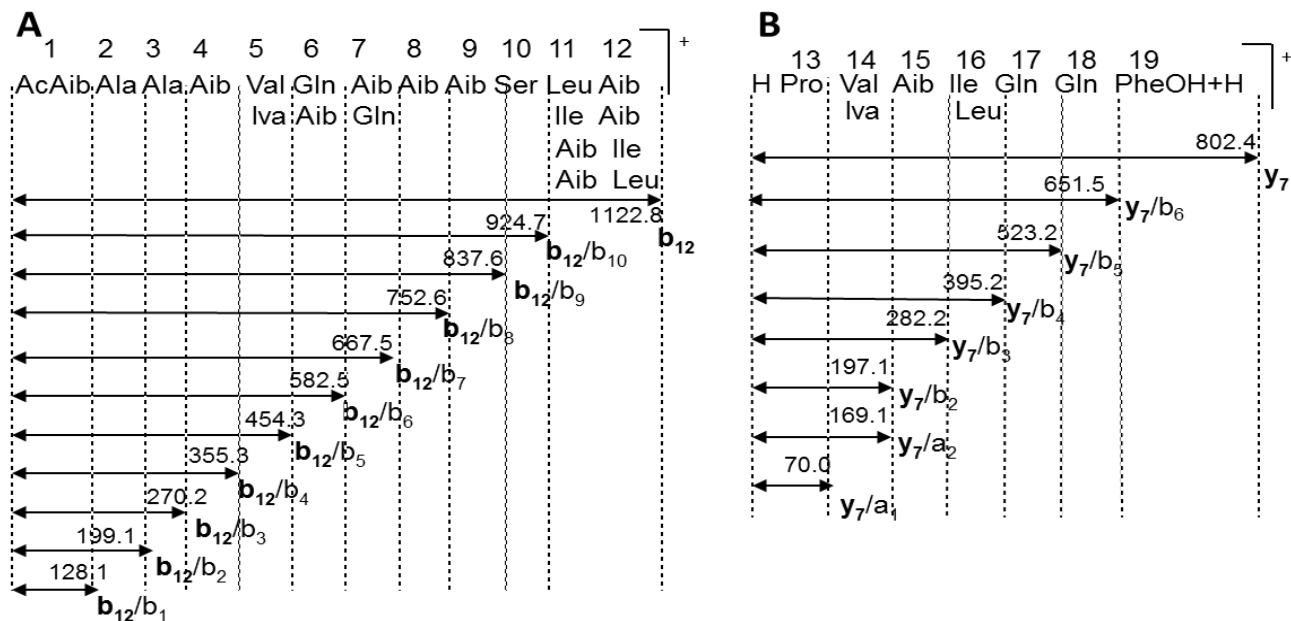

Secondary fragmentation of TA.VIb (9):  $m/z$  1108.6—see secondary fragmentation of TA1924a (Figure S12A). In addition, peaks are present indicating an impurity of  $m/z$  1108.6 with other amino acid sequence—see secondary fragmentation of TA1910 (Figure S11A),  $m/z$  824.4—see secondary fragmentation of TA1909a (Figure S13B); Secondary fragmentation of TA.Vb (12):  $m/z$  1108.8—see secondary fragmentation of TA1924a (Figure S12A),  $m/z$  838.6—see secondary fragmentation of TA1909 (Figure S7B).

**Figure S16.**  $^1\text{H}$  spectrum of TA1909 (2).

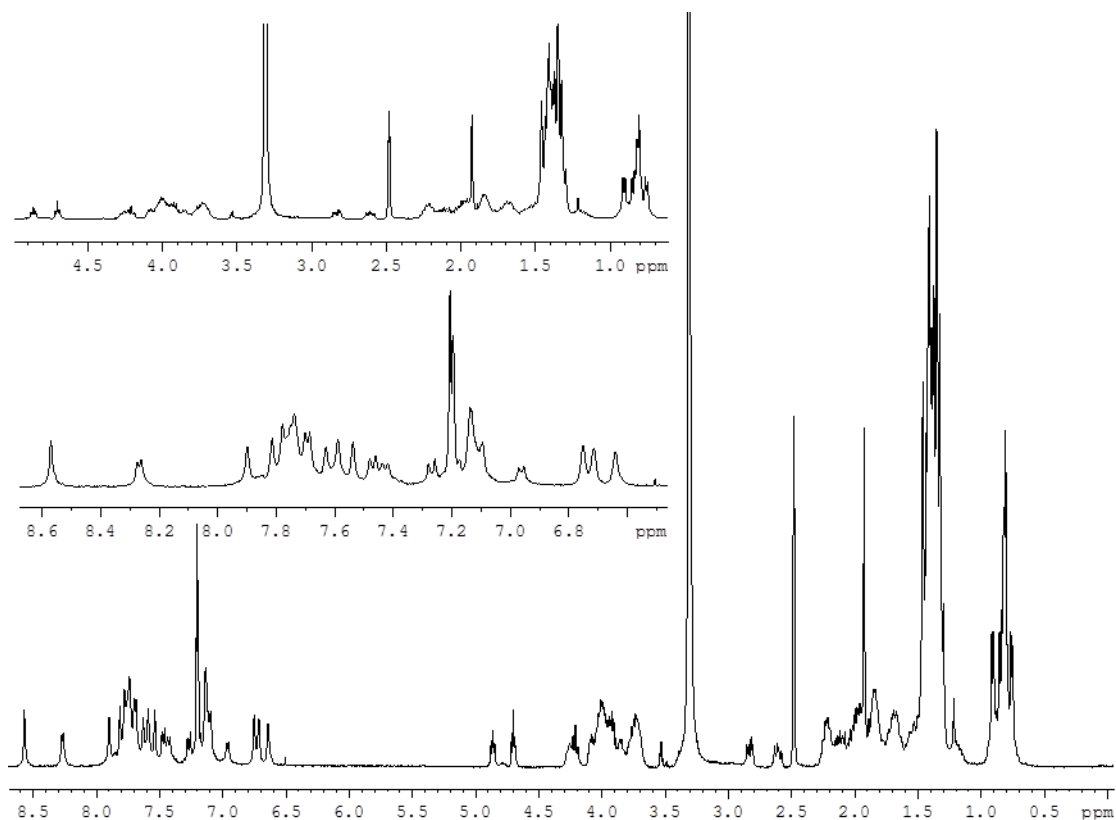



**Figure S17.**  $^{13}\text{C}$  spectrum of TA1909 (2).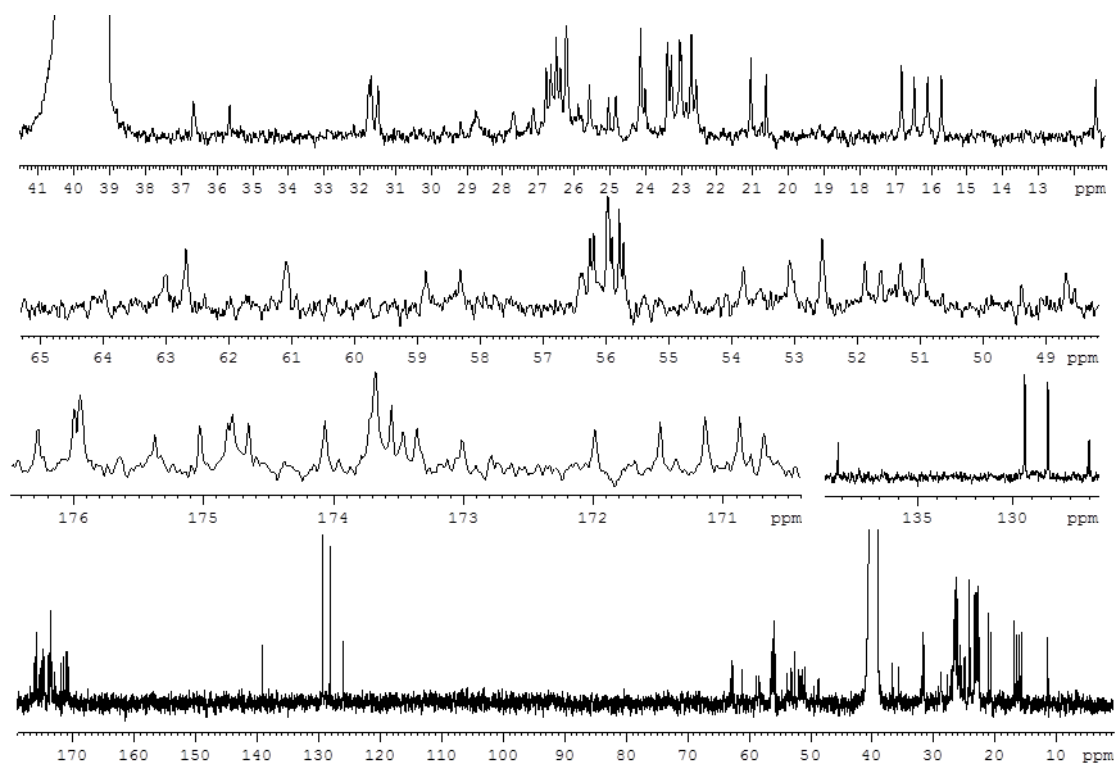**Figure S18.**  $^1\text{H}$  spectrum of TA1895 (3).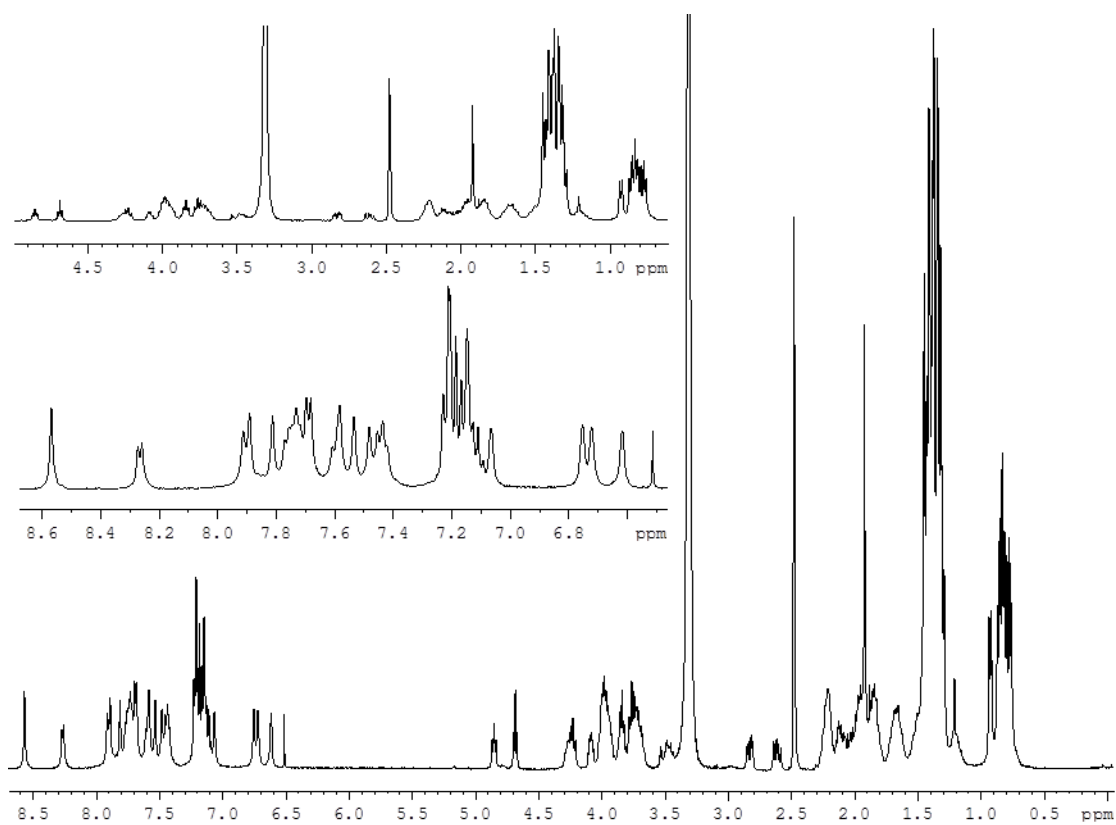

**Figure S19.**  $^{13}\text{C}$  spectrum of TA1895 (3).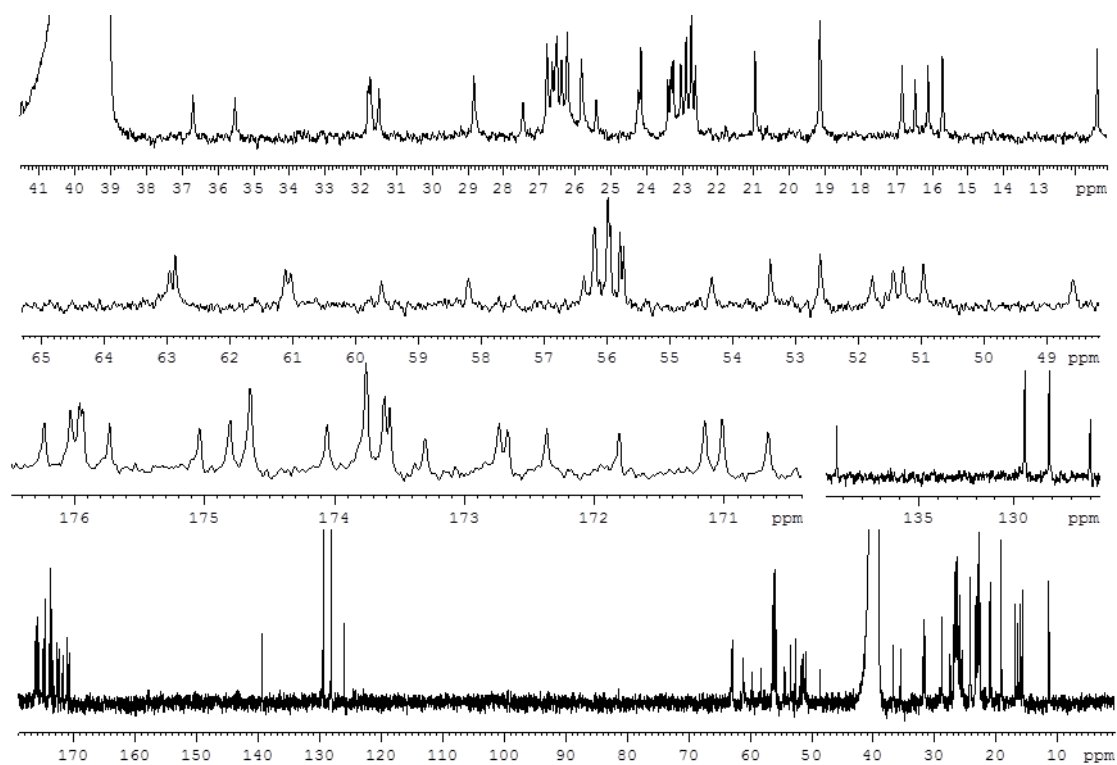**Figure S20.**  $^1\text{H}$  spectrum of TA1896 (4).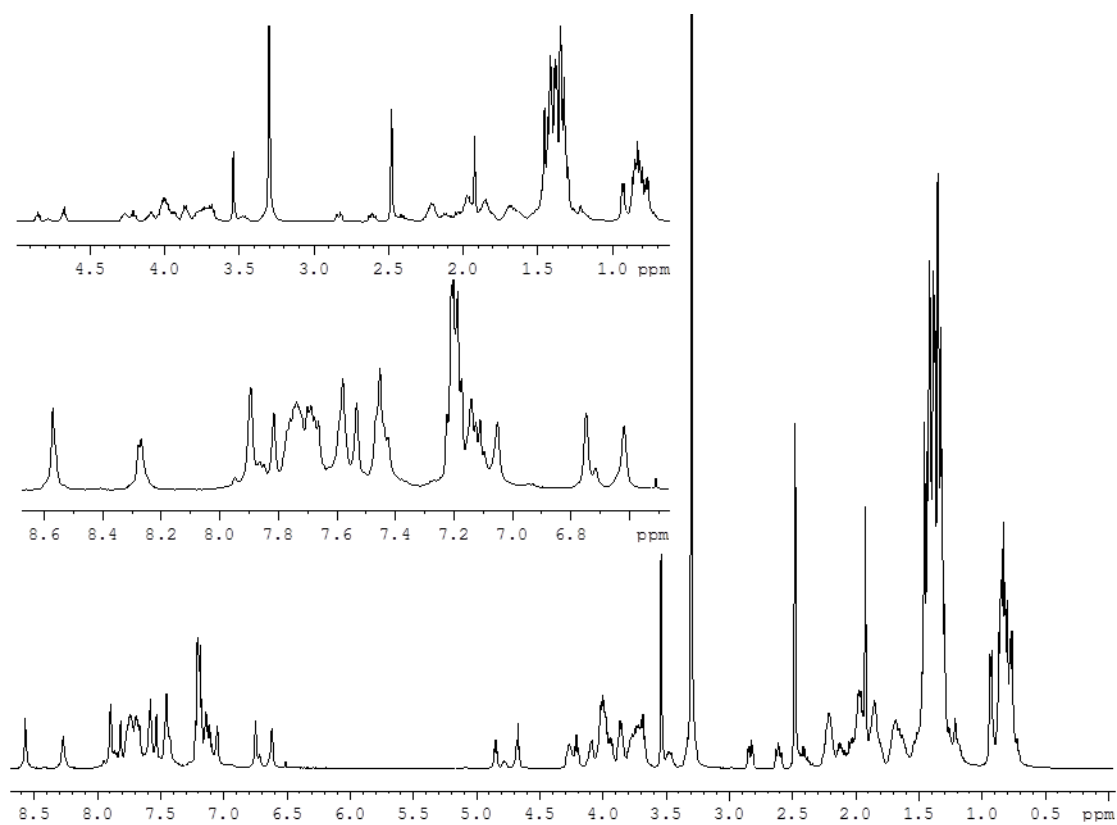

**Figure S21.**  $^{13}\text{C}$  spectrum of TA1896 (4).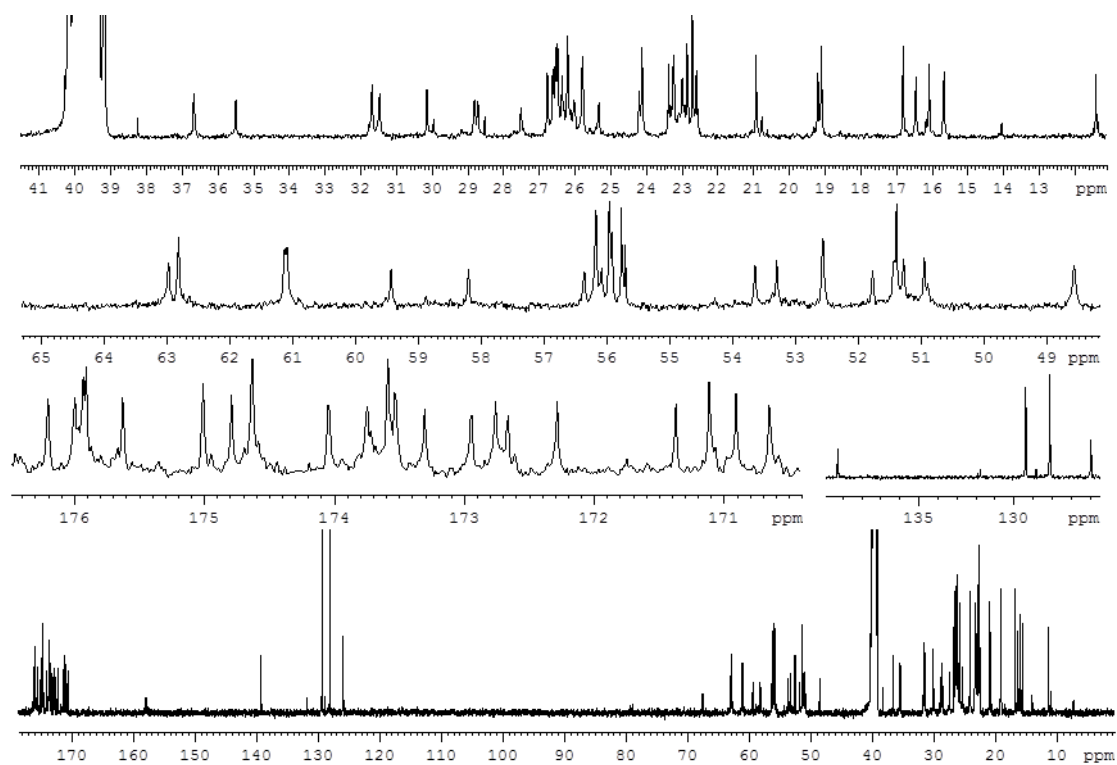**Figure S22.**  $^1\text{H}$  spectrum of TA1924 (5).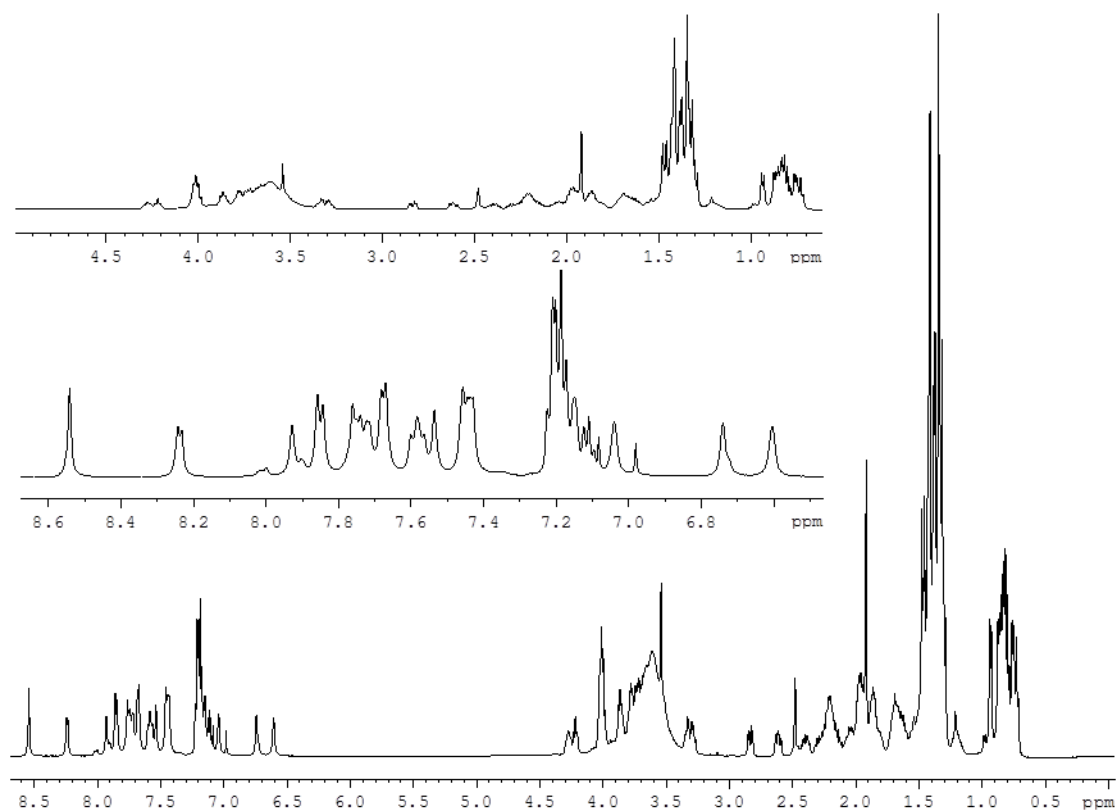

**Figure 23.**  $^{13}\text{C}$  spectrum of TA1924 (5).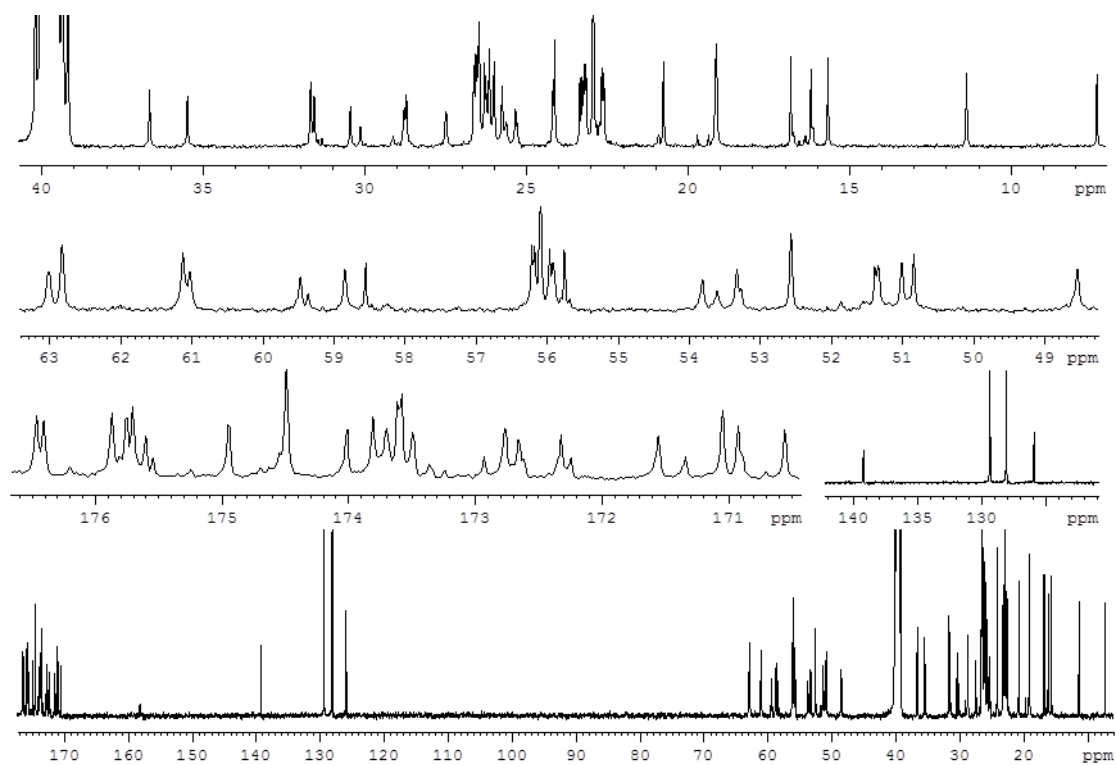**Figure S24.**  $^1\text{H}$  spectrum of TA1910 (6).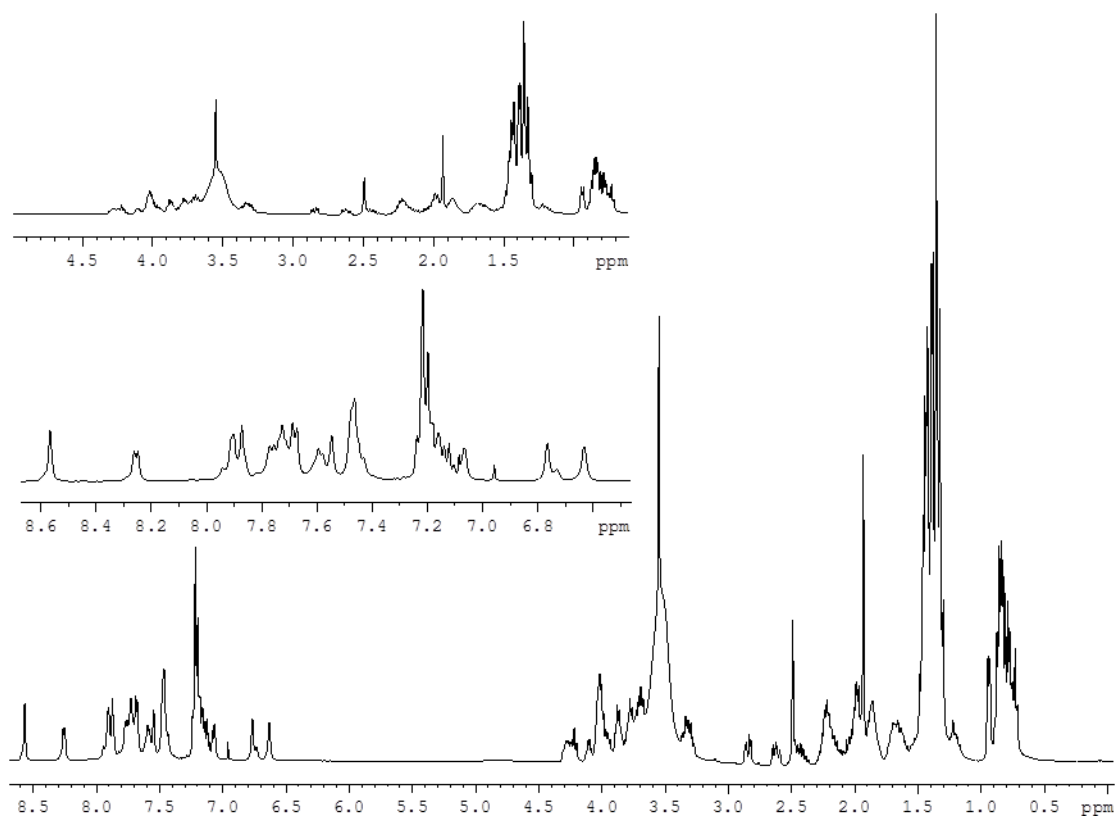

**Figure S25.**  $^{13}\text{C}$  spectrum of TA1910 (6).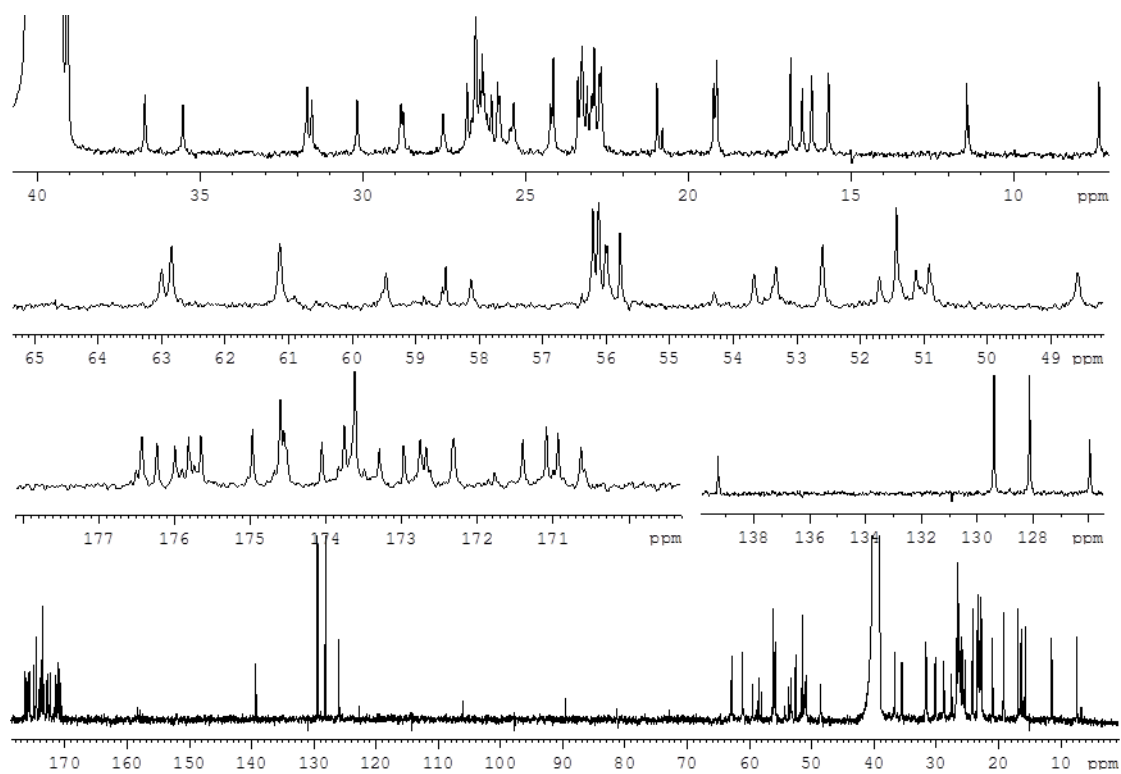**Figure S26.**  $^1\text{H}$  spectrum of TA1924A (7).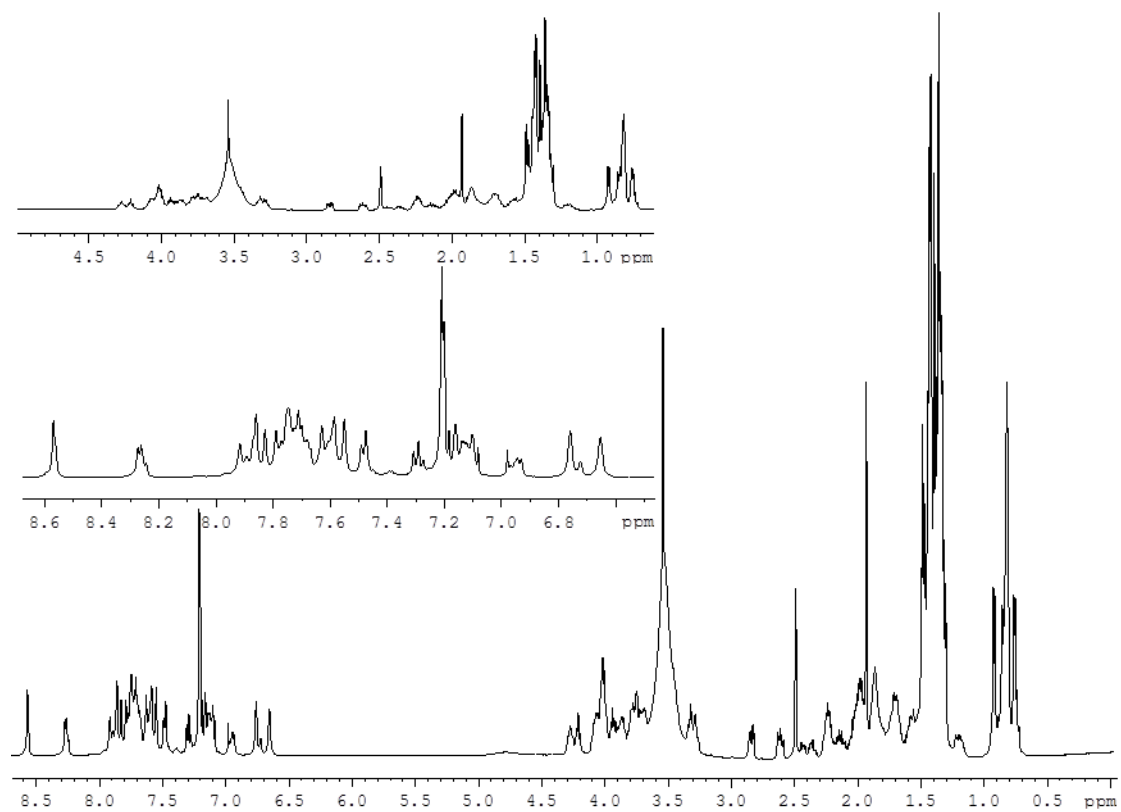

**Figure S27.**  $^{13}\text{C}$  spectrum of TA1924A (7).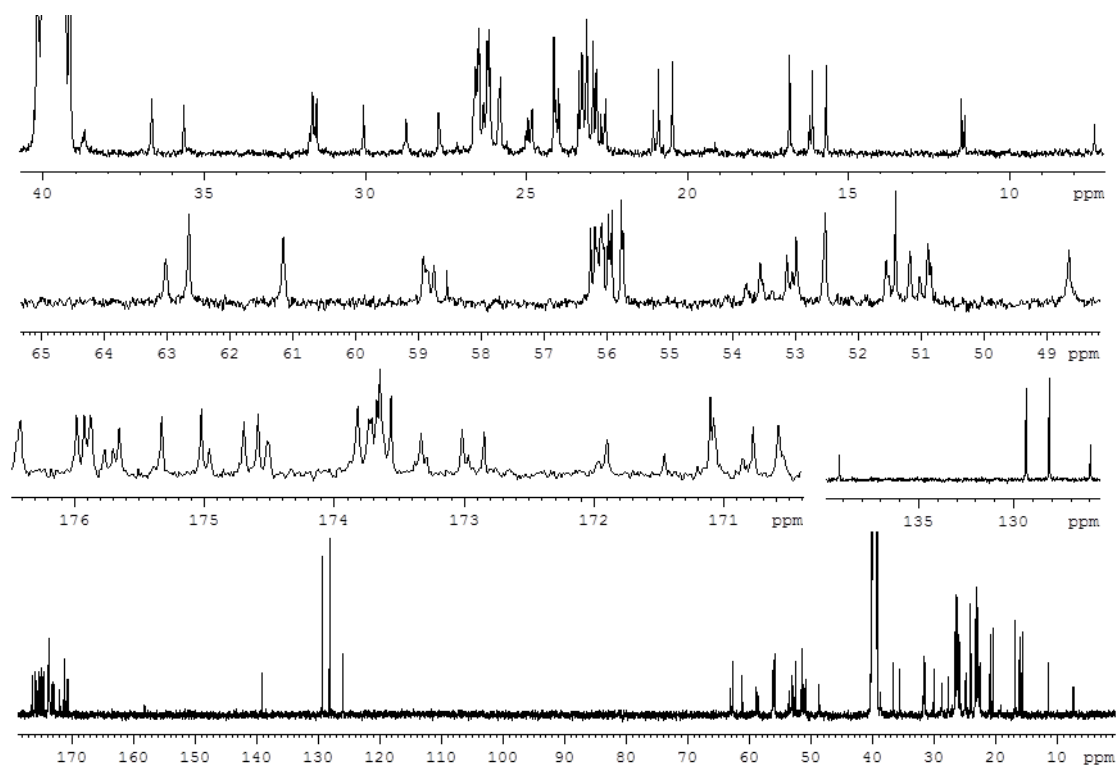**Figure S28.**  $^1\text{H}$  spectrum of TA1909A (8).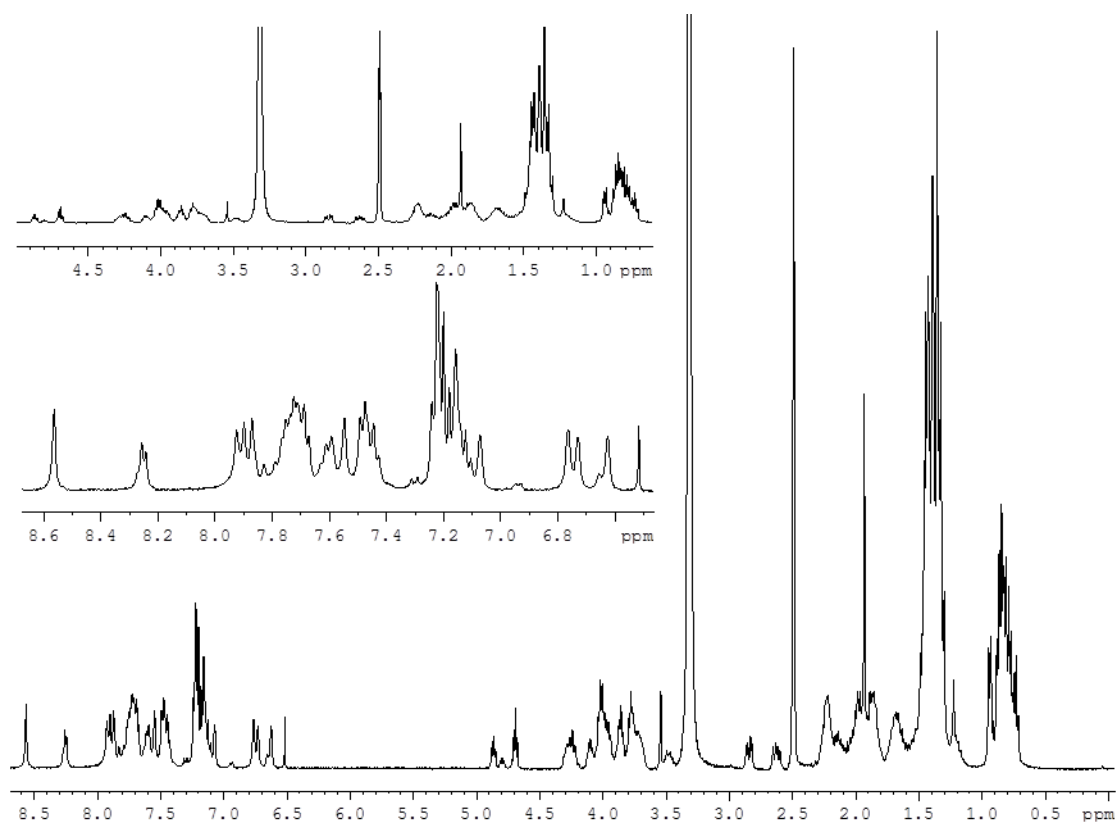

Figure S29.  $^{13}\text{C}$  spectrum of TA1909A (8).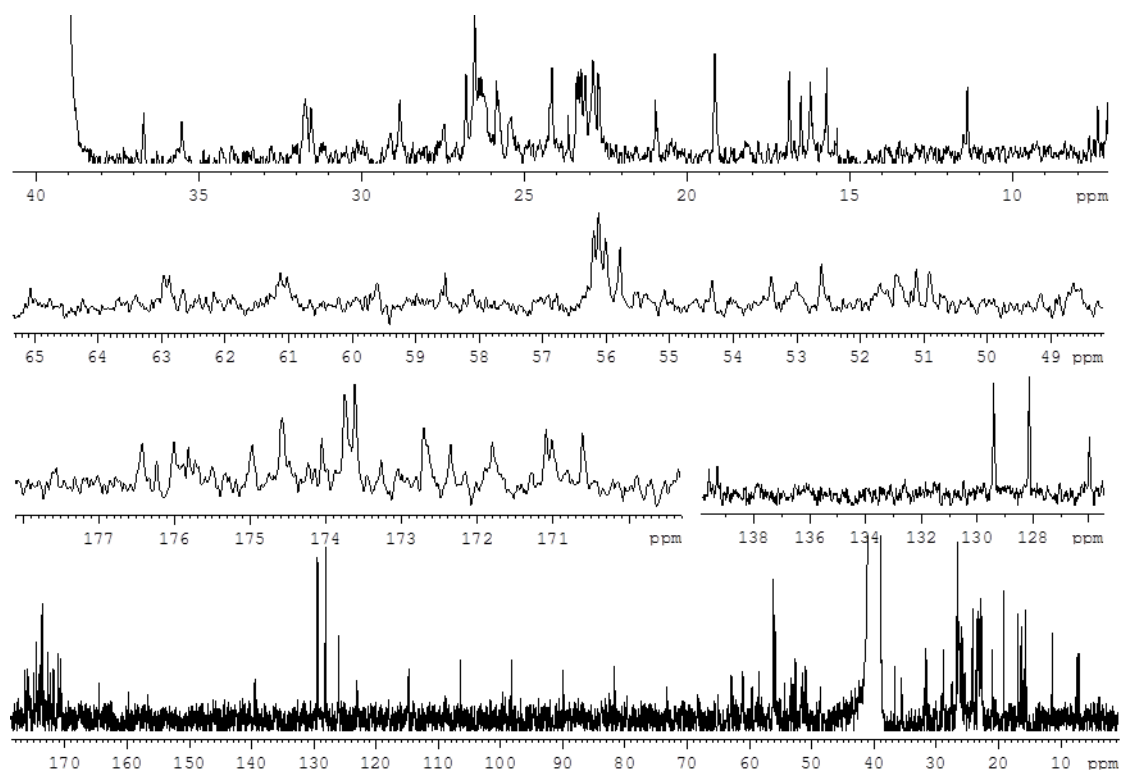

Figure S30. Structure of TA1909 (2) presenting key HMBC (—) and ROESY (---) correlations.

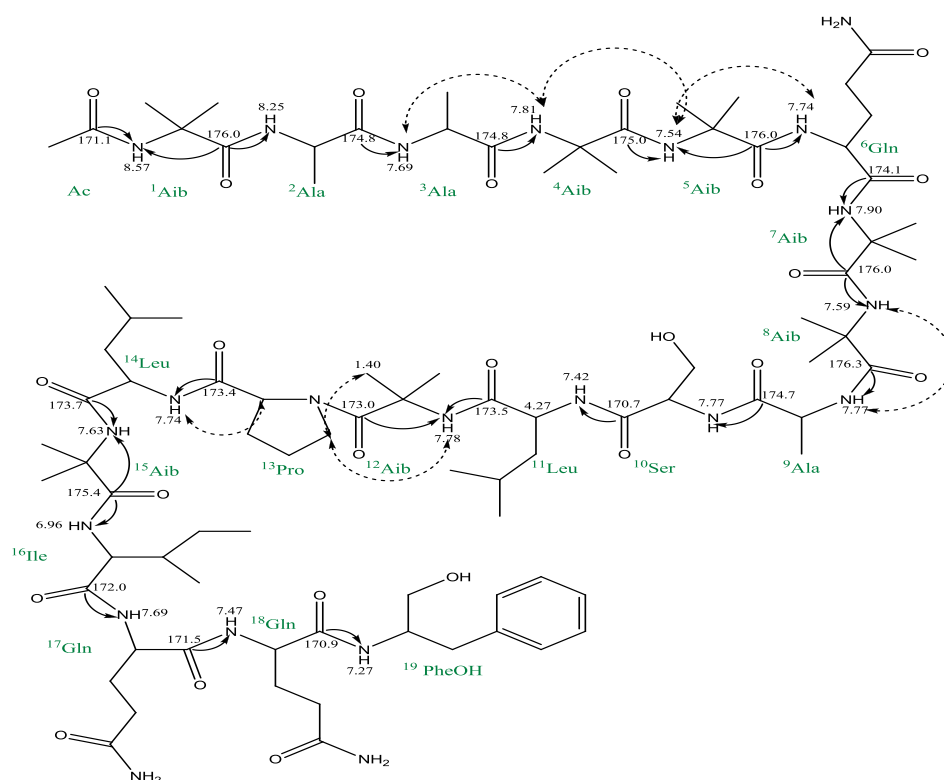

**Figure S31.** Structure of TA1895 (**3**) presenting key HMBC (↷) and ROESY (⋯) correlations.

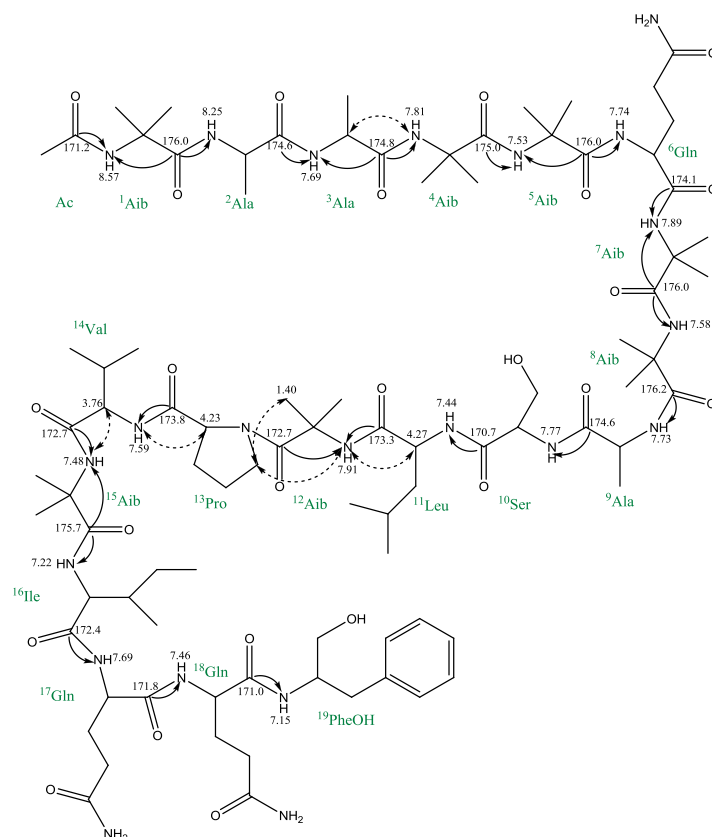

**Figure S32.** Structure of TA1896 (**4**) presenting key HMBC (↷) and ROESY (⋯) correlations.

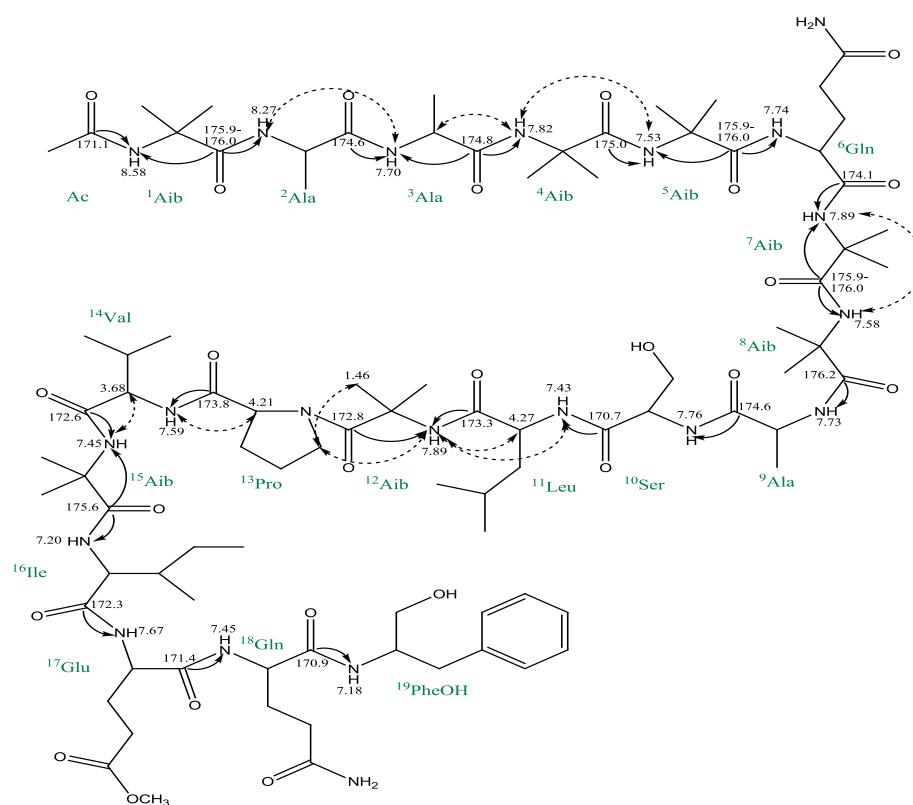



**Figure S33.** Structure of TA1924 (5) presenting key HMBC (↷) and ROESY (⋯) correlations.

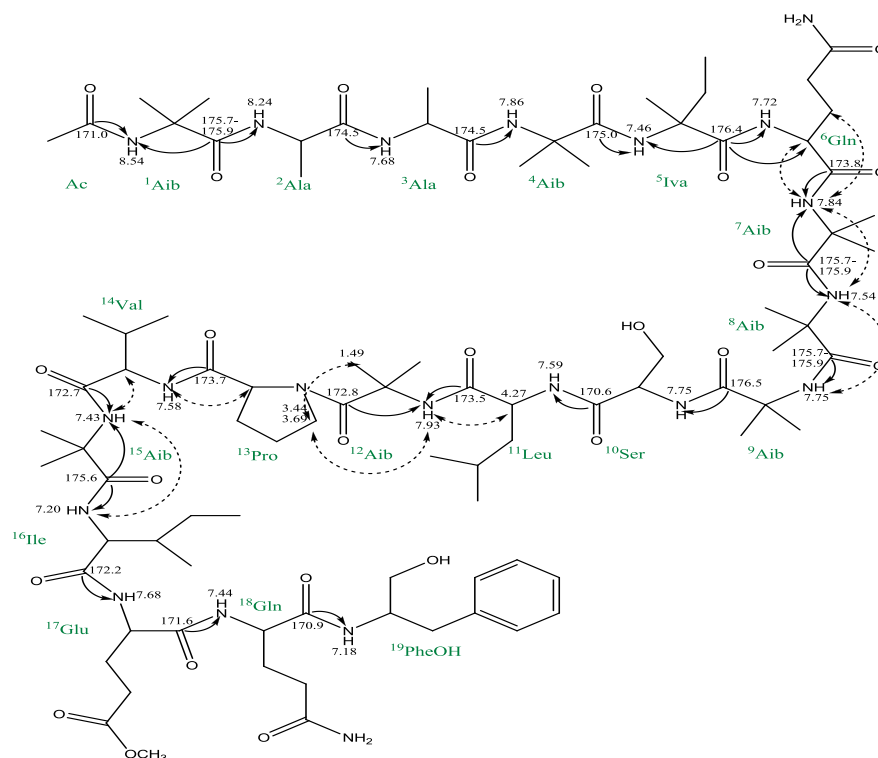

**Figure S34.** Structure of TA1910 (6) presenting key HMBC (↷) and ROESY (⋯) correlations.

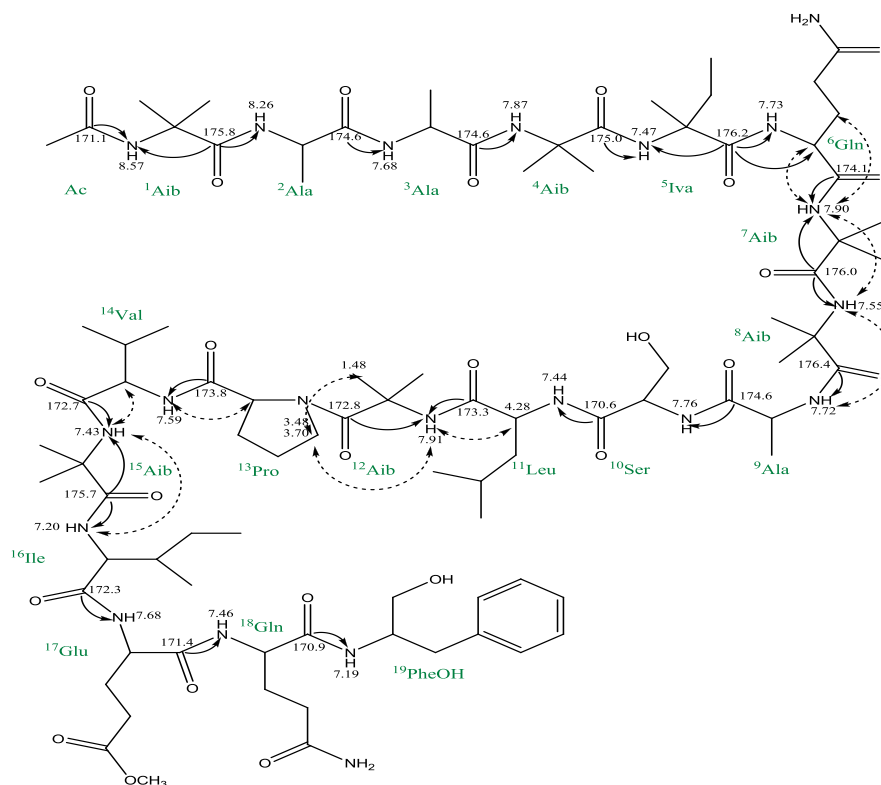

**Figure S35.** Structure of TA1924a (**7**) presenting key HMBC (↷) and ROESY (⋯) correlations.

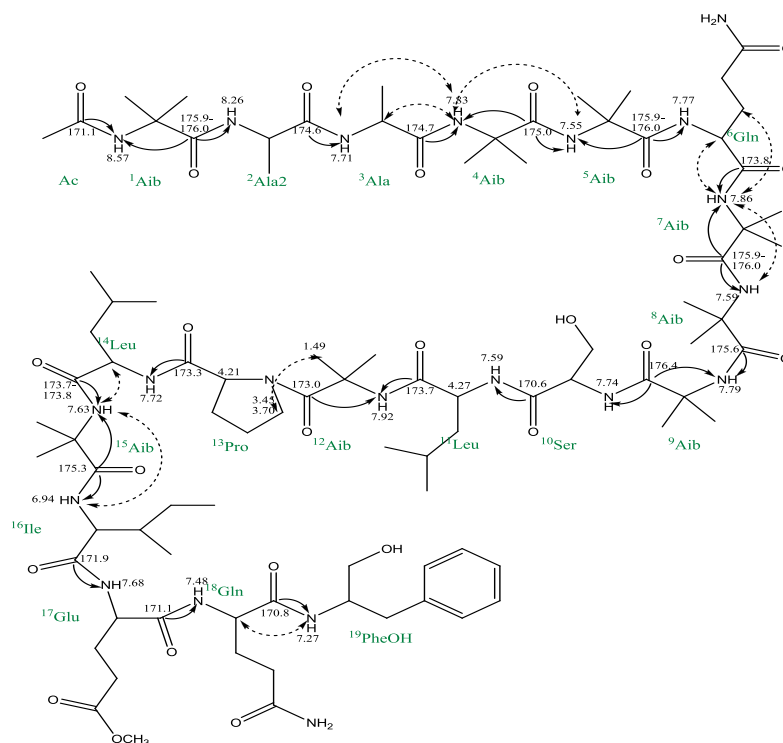

**Figure S36.** Structure of TA1909a (**8**) presenting key HMBC (↷) and ROESY (⋯) correlations.

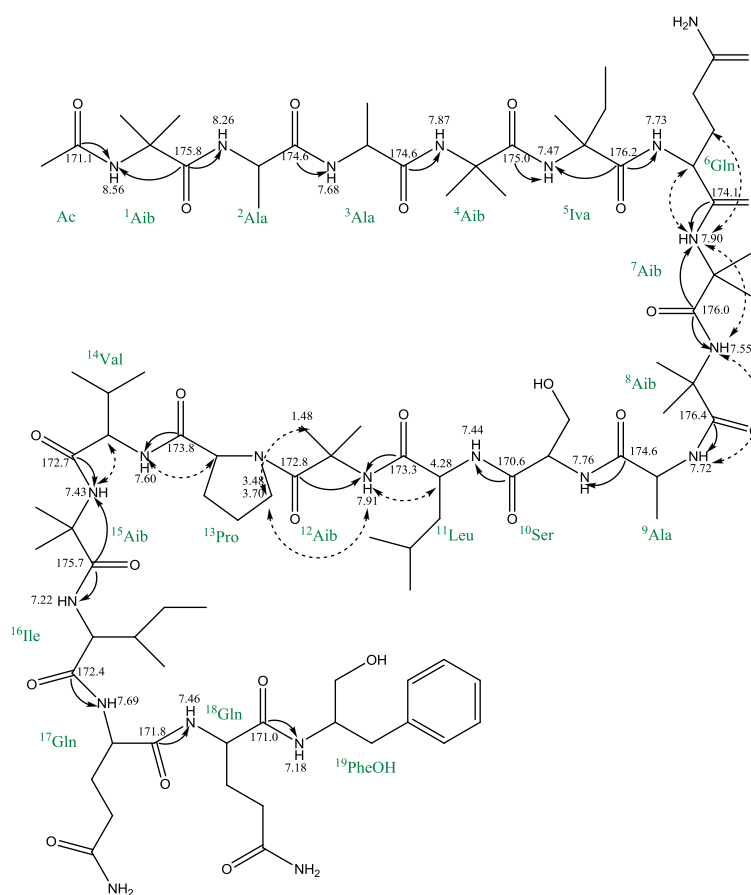

**Figure S37.** Structure of TA.VIb (**9**) presenting key HMBC (  $\curvearrowright$  ) and ROESY (  $\cdots$  ) correlations.

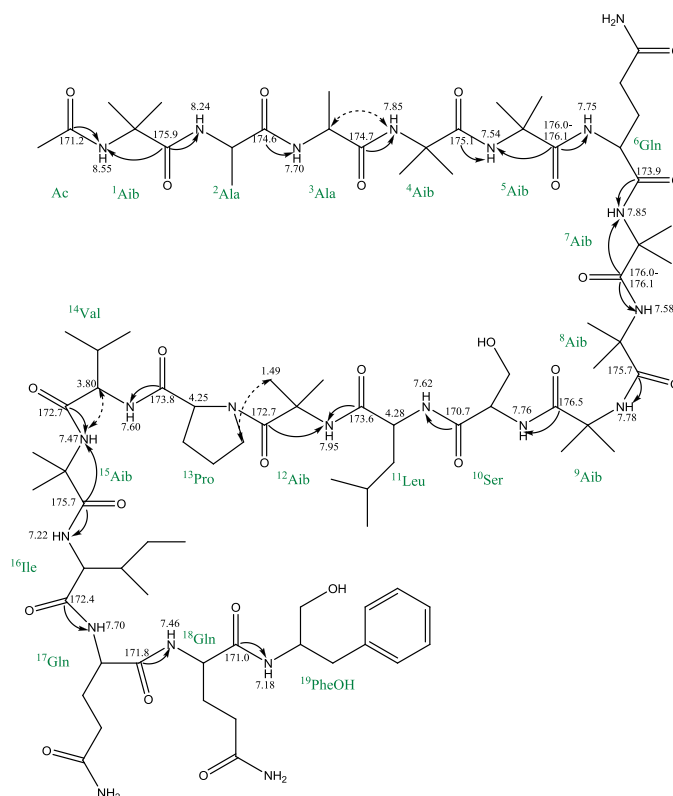

**Figure S38.** Structure of TA.VIa (**10**) presenting key HMBC (  $\curvearrowright$  ) and ROESY (  $\cdots$  ) correlations.

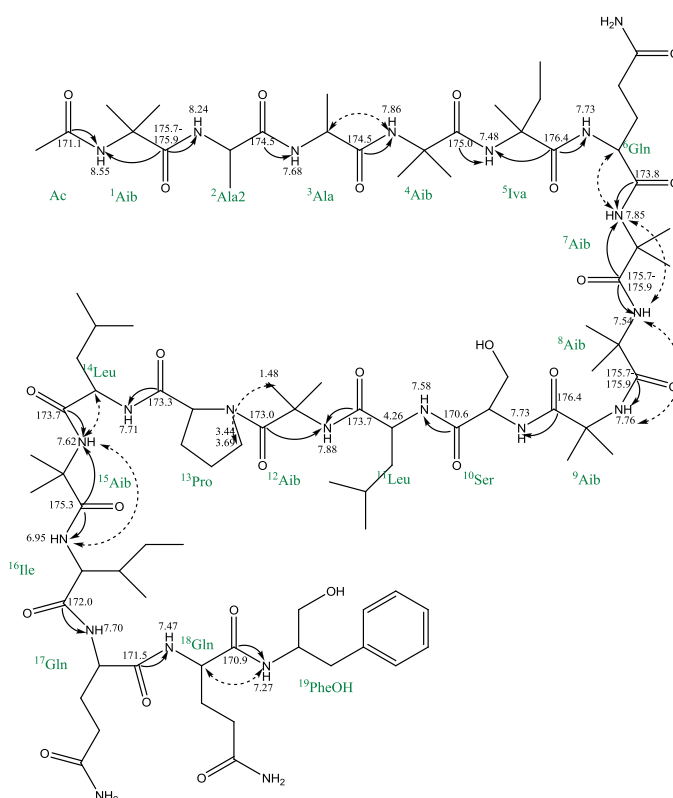

**Figure S39.** Structure of TA.VII (11) presenting key HMBC (  $\curvearrowright$  ) and ROESY (  $\cdots$  ) correlations.

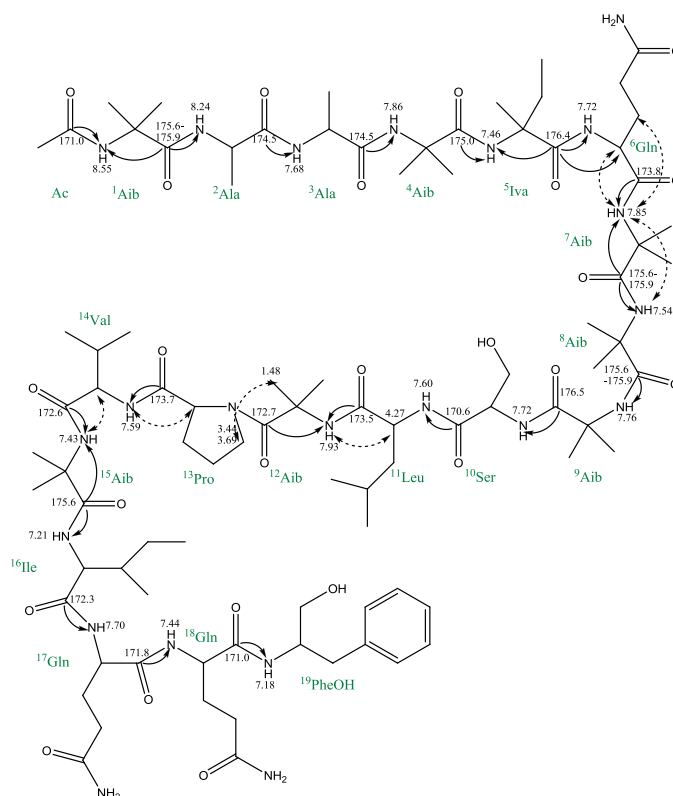

**Figure S40.** Structure of TA.Vb (12) presenting key HMBC (  $\curvearrowright$  ) and ROESY (  $\cdots$  ) correlations.

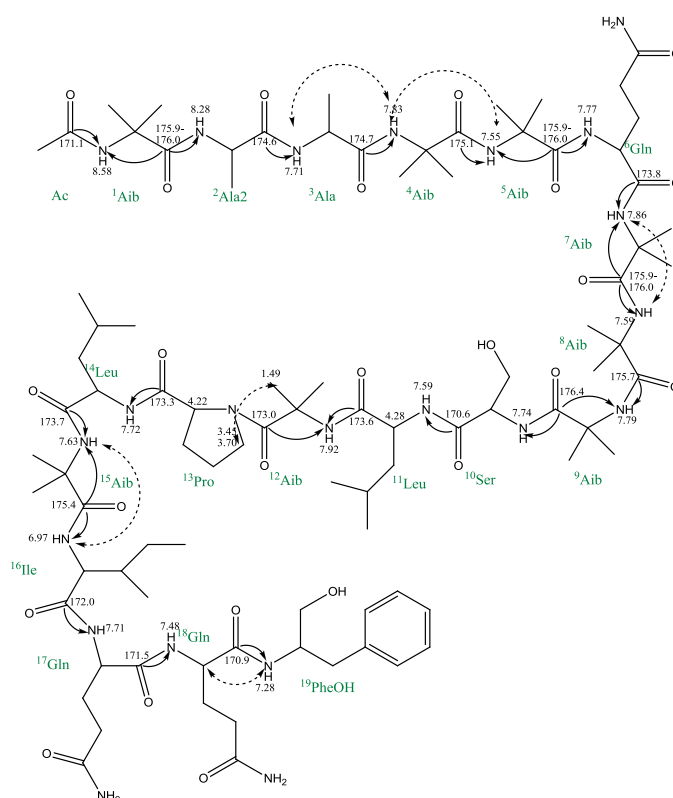

**Table S1.** Known trichorzianines [1–3]. Positions marked in grey differ between compounds.

| Trichorzianines | 1     | 2   | 3   | 4   | 5   | 6   | 7   | 8   | 9   | 10  | 11  | 12  | 13  | 14  | 15  | 16  | 17  | 18  | 19    | MW<br>(g/mol) |
|-----------------|-------|-----|-----|-----|-----|-----|-----|-----|-----|-----|-----|-----|-----|-----|-----|-----|-----|-----|-------|---------------|
| TA IIa          | AcAib | Ala | Ala | Aib | Aib | Gln | Aib | Aib | Aib | Ser | Leu | Aib | Pro | Leu | Aib | Ile | Gln | Gln | TrpOH | 1962.1        |
| TA IIIa         | AcAib | Ala | Ala | Aib | Iva | Gln | Aib | Aib | Aib | Ser | Leu | Aib | Pro | Leu | Aib | Ile | Gln | Gln | TrpOH | 1976.2        |
| TA IIIb         | AcAib | Ala | Ala | Aib | Aib | Gln | Aib | Aib | Aib | Ser | Leu | Aib | Pro | Val | Aib | Leu | Gln | Gln | TrpOH | 1948.1        |
| TA IIIc         | AcAib | Ala | Ala | Aib | Aib | Gln | Aib | Aib | Aib | Ser | Leu | Aib | Pro | Val | Aib | Ile | Gln | Gln | TrpOH | 1948.1        |
| TA IVb          | AcAib | Ala | Ala | Aib | Iva | Gln | Aib | Aib | Aib | Ser | Leu | Aib | Pro | Val | Aib | Ile | Gln | Gln | TrpOH | 1962.1        |
| TA Vb           | AcAib | Ala | Ala | Aib | Aib | Gln | Aib | Aib | Aib | Ser | Leu | Aib | Pro | Leu | Aib | Ile | Gln | Gln | PheOH | 1923.1        |
| TA VIa          | AcAib | Ala | Ala | Aib | Iva | Gln | Aib | Aib | Aib | Ser | Leu | Aib | Pro | Leu | Aib | Ile | Gln | Gln | PheOH | 1937.1        |
| TA VIb          | AcAib | Ala | Ala | Aib | Aib | Gln | Aib | Aib | Aib | Ser | Leu | Aib | Pro | Val | Aib | Ile | Gln | Gln | PheOH | 1909.1        |
| TA VII          | AcAib | Ala | Ala | Aib | Iva | Gln | Aib | Aib | Aib | Ser | Leu | Aib | Pro | Val | Aib | Ile | Gln | Gln | PheOH | 1923.1        |
| TB IIa          | AcAib | Ala | Ala | Aib | Aib | Gln | Aib | Aib | Aib | Ser | Leu | Aib | Pro | Leu | Aib | Ile | Gln | Glu | TrpOH | 1963.1        |
| TB IIIc         | AcAib | Ala | Ala | Aib | Aib | Gln | Aib | Aib | Aib | Ser | Leu | Aib | Pro | Val | Aib | Ile | Gln | Glu | TrpOH | 1949.1        |
| TB IVb          | AcAib | Ala | Ala | Aib | Iva | Gln | Aib | Aib | Aib | Ser | Leu | Aib | Pro | Val | Aib | Ile | Gln | Glu | TrpOH | 1963.1        |
| TB Vb           | AcAib | Ala | Ala | Aib | Aib | Gln | Aib | Aib | Aib | Ser | Leu | Aib | Pro | Leu | Aib | Ile | Gln | Glu | PheOH | 1924.1        |
| TB VIa          | AcAib | Ala | Ala | Aib | Iva | Gln | Aib | Aib | Aib | Ser | Leu | Aib | Pro | Leu | Aib | Ile | Gln | Glu | PheOH | 1938.1        |
| TB VIb          | AcAib | Ala | Ala | Aib | Aib | Gln | Aib | Aib | Aib | Ser | Leu | Aib | Pro | Val | Aib | Ile | Gln | Glu | PheOH | 1910.1        |

Table S2. NMR data for TA1909 <sup>a</sup> (2) in DMSO-*d*<sub>6</sub>.

| Position         | $\delta_C$ , mult. <sup>b</sup> | $\delta_H$ , mult., <i>J</i> (Hz) | LR C-H correlations <sup>c</sup>             | NOE correlations <sup>d</sup>                                |                                                                  |
|------------------|---------------------------------|-----------------------------------|----------------------------------------------|--------------------------------------------------------------|------------------------------------------------------------------|
| Ac               | 1                               | 171.1 s                           | Ac-2, <sup>1</sup> Aib-NH                    |                                                              |                                                                  |
|                  | 2                               | 23.1 q                            | 1.93 s                                       | <sup>1</sup> Aib-NH,3,4                                      |                                                                  |
| <sup>1</sup> Aib | 1                               | 176.0 <sup>e</sup> s              | <sup>2</sup> Ala-NH, <sup>1</sup> Aib-NH,3,4 |                                                              |                                                                  |
|                  | 2                               | 55.7 <sup>f</sup> s               | <sup>1</sup> Aib-NH,3,4                      |                                                              |                                                                  |
|                  | 3                               | 26.5 <sup>g</sup> q               | 1.35 s                                       | <sup>1</sup> Aib-NH                                          | <sup>1</sup> Aib-NH                                              |
|                  | 4                               | 24.1 q                            | 1.32 s                                       | <sup>1</sup> Aib-3                                           | <sup>1</sup> Aib-NH                                              |
|                  | NH                              |                                   | 8.57 s                                       |                                                              | Ac-2, <sup>1</sup> Aib-3,4                                       |
| <sup>2</sup> Ala | 1                               | 174.8 s                           | <sup>3</sup> Ala-NH, <sup>2</sup> Ala-2,3    |                                                              |                                                                  |
|                  | 2                               | 51.0 d                            | 3.99 m                                       | <sup>2</sup> Ala-NH,3                                        | <sup>2</sup> Ala-NH,3                                            |
|                  | 3                               | 16.8 q                            | 1.31 d                                       | <sup>2</sup> Ala-NH,2                                        | <sup>2</sup> Ala-NH,2                                            |
|                  | NH                              |                                   | 8.27 d (5.0)                                 |                                                              | <sup>3</sup> Ala-NH, <sup>2</sup> Ala-2,3                        |
| <sup>3</sup> Ala | 1                               | 174.8 s                           | <sup>4</sup> Aib-NH, <sup>3</sup> Ala-2,3    |                                                              |                                                                  |
|                  | 2                               | 51.4 d                            | 3.99 m                                       | <sup>3</sup> Ala-NH,3                                        | <sup>3</sup> Ala-NH,3, <sup>4</sup> Aib-NH                       |
|                  | 3                               | 16.1 q                            | 1.33 d                                       | <sup>2</sup> Ala-NH,2                                        | <sup>3</sup> Ala-NH,2                                            |
|                  | NH                              |                                   | 7.69 d (6.4)                                 |                                                              | <sup>4</sup> Aib-NH, <sup>2</sup> Ala-NH, <sup>3</sup> Ala-2,3   |
| <sup>4</sup> Aib | 1                               | 175.0 s                           | <sup>5</sup> Aib-NH,3                        |                                                              |                                                                  |
|                  | 2                               | 56.0 s                            | <sup>4</sup> Aib-NH,3,4                      |                                                              |                                                                  |
|                  | 3                               | 26.2 q                            | 1.41 <sup>j</sup> s                          | <sup>4</sup> Aib-NH,4                                        | <sup>4</sup> Aib-NH                                              |
|                  | 4                               | 23.3 <sup>i</sup> q               | 1.36 <sup>k</sup> s                          | <sup>4</sup> Aib-3                                           | <sup>4</sup> Aib-NH                                              |
|                  | NH                              |                                   | 7.81 s                                       |                                                              | <sup>4</sup> Aib-2,3, <sup>3</sup> Ala-NH,2, <sup>5</sup> Aib-NH |
| <sup>5</sup> Aib | 1                               | 176.0 <sup>e</sup> s              | <sup>6</sup> Gln-NH, <sup>5</sup> Aib-3,4,NH |                                                              |                                                                  |
|                  | 2                               | 55.8 <sup>f</sup> s               | <sup>5</sup> Aib-NH,3,4                      |                                                              |                                                                  |
|                  | 3                               | 26.7 <sup>h</sup> q               | 1.44 s                                       | <sup>5</sup> Aib-NH,4                                        | <sup>5</sup> Aib-NH                                              |
|                  | 4                               | 22.6 q                            | 1.39 s                                       | <sup>5</sup> Aib-3                                           | <sup>5</sup> Aib-NH                                              |
|                  | NH                              |                                   | 7.54 s                                       |                                                              | <sup>5</sup> Aib-3,4, <sup>4</sup> Aib-NH, <sup>6</sup> Gln-NH   |
| <sup>6</sup> Gln | 1                               | 174.1 s                           | <sup>7</sup> Aib-NH, <sup>6</sup> Gln-2,3    |                                                              |                                                                  |
|                  | 2                               | 56.2 d                            | 3.74 m                                       | <sup>6</sup> Gln-NH,3,4a,4b                                  | <sup>7</sup> Aib-NH, <sup>6</sup> Gln-NH,3,4a,4b                 |
|                  | 3                               | 26.2 t                            | 1.98 m                                       | <sup>6</sup> Gln-2,4a,4b                                     | <sup>6</sup> Gln-2,NH, <sup>7</sup> Aib-NH                       |
|                  | 4a                              | 31.5 <sup>i</sup> t               | 2.13 m                                       | <sup>6</sup> Gln-3, NH <sub>2</sub> b                        | <sup>6</sup> Gln-2,4b,NH, NH <sub>2</sub> a                      |
|                  | 4b                              |                                   | 2.23 m                                       |                                                              | <sup>6</sup> Gln-2,4a                                            |
|                  | 5                               | 173.6 s                           |                                              | <sup>6</sup> Gln-3,4a,4b,NH <sub>2</sub> a,NH <sub>2</sub> b |                                                                  |
|                  | NH <sub>2</sub> a               |                                   | 7.13 s                                       |                                                              | <sup>6</sup> Gln-4a, NH <sub>2</sub> b                           |
|                  | NH <sub>2</sub> b               |                                   | 6.75 s                                       |                                                              | <sup>6</sup> Gln-NH <sub>2</sub> a                               |
| NH               |                                 | 7.74 m                            |                                              | <sup>6</sup> Gln-2,3,4a, <sup>5</sup> Aib-NH                 |                                                                  |
| <sup>7</sup> Aib | 1                               | 176.0 <sup>e</sup> s              | <sup>8</sup> Aib-NH, <sup>7</sup> Aib-NH,3   |                                                              |                                                                  |
|                  | 2                               | 56.0 s                            | <sup>7</sup> Aib-NH,3,4                      |                                                              |                                                                  |
|                  | 3                               | 26.2 <sup>g</sup> q               | 1.41 <sup>j</sup> s                          |                                                              | <sup>7</sup> Aib-NH                                              |
|                  | 4                               | 23.0 q                            | 1.34 <sup>k</sup> s                          | <sup>7</sup> Aib-NH,3                                        | <sup>7</sup> Aib-NH                                              |
|                  | NH                              |                                   | 7.90 s                                       |                                                              | <sup>6</sup> Gln-2,3, <sup>7</sup> Aib-3,4, <sup>8</sup> Aib-NH  |
| <sup>8</sup> Aib | 1                               | 176.3 s                           | <sup>9</sup> Aib-NH, <sup>8</sup> Aib-3,4    |                                                              |                                                                  |
|                  | 2                               | 56.0 s                            | <sup>8</sup> Aib-NH,3,4                      |                                                              |                                                                  |
|                  | 3                               | 26.8 <sup>h</sup> q               | 1.46 s                                       | <sup>8</sup> Aib-NH,4                                        | <sup>8</sup> Aib-NH                                              |
|                  | 4                               | 22.7 q                            | 1.38 s                                       | <sup>8</sup> Aib-3                                           | <sup>8</sup> Aib-NH                                              |
|                  | NH                              |                                   | 7.59                                         |                                                              | <sup>8</sup> Aib-3,4, <sup>7</sup> Aib-NH, <sup>9</sup> Ala-NH   |

Table S2. Cont.

|                   |    |                     |                     |                                                |                                                                  |
|-------------------|----|---------------------|---------------------|------------------------------------------------|------------------------------------------------------------------|
| <sup>9</sup> Ala  | 1  | 174.7 s             |                     | <sup>10</sup> Ser-NH, <sup>9</sup> Ala-2       |                                                                  |
|                   | 2  | 51.9 d              | 3.94 m              | <sup>9</sup> Ala-3                             | <sup>9</sup> Ala-NH,3                                            |
|                   | 3  | 16.5 q              | 1.40 d              | <sup>9</sup> Ala-2                             | <sup>9</sup> Ala-NH,2                                            |
|                   | NH |                     | 7.73 m              |                                                | <sup>9</sup> Ala-2,3, <sup>8</sup> Aib-NH                        |
| <sup>10</sup> Ser | 1  | 170.7 s             |                     | <sup>11</sup> Leu-NH, <sup>10</sup> Ser-2,3a   |                                                                  |
|                   | 2  | 58.3 d              | 4.09 m              | <sup>10</sup> Ser-NH,OH                        | <sup>10</sup> Ser-NH,3a,3b, <sup>11</sup> Leu-NH                 |
|                   | 3a | 61.1 t              | 3.72 m              | <sup>10</sup> Ser-NH,2,OH                      | <sup>10</sup> Ser-NH,2,OH                                        |
|                   | 3b |                     | 3.77 m              |                                                | <sup>10</sup> Ser-NH,2,OH                                        |
|                   | OH |                     | 4.86 t (6.0)        |                                                | <sup>10</sup> Ser-NH,3a,3b                                       |
|                   | NH |                     | 7.77 m              |                                                | <sup>10</sup> Ser-2,3a,3b,OH                                     |
| <sup>11</sup> Leu | 1  | 173.5 s             |                     | <sup>12</sup> Aib-NH, <sup>11</sup> Leu-2      |                                                                  |
|                   | 2  | 51.6 d              | 4.27 m              | <sup>11</sup> Leu-NH                           | <sup>11</sup> Leu-NH,4,5,3a,3b, <sup>14</sup> Leu-5              |
|                   | 3a | 39.5 t              | 1.54 m              | <sup>11</sup> Leu-2,5,6                        | <sup>11</sup> Leu-2,5,3b                                         |
|                   | 3b |                     | 1.67 m              |                                                | <sup>11</sup> Leu-NH,2,3a,5                                      |
|                   | 4  | 24.0 d              | 1.73 m              | <sup>11</sup> Leu-5,6                          | <sup>11</sup> Leu-NH,6                                           |
|                   | 5  | 20.6 q              | 0.76 d (6.0)        | <sup>11</sup> Leu-6,3b                         | <sup>11</sup> Leu-2,3a,3b                                        |
|                   | 6  | 23.0 q              | 0.81 d              | <sup>11</sup> Leu-5,3b                         | <sup>11</sup> Leu-4                                              |
|                   | NH |                     | 7.43 d (7.9)        |                                                | <sup>10</sup> Ser-2, <sup>11</sup> Leu-2,3b,4                    |
| <sup>12</sup> Aib | 1  | 173.0 s             |                     | <sup>12</sup> Aib-NH,3,4                       |                                                                  |
|                   | 2  | 55.9 s              |                     | <sup>12</sup> Aib-NH,3,4                       |                                                                  |
|                   | 3  | 25.6 q              | 1.40 s              | <sup>12</sup> Aib-4                            | <sup>12</sup> Aib-NH                                             |
|                   | 4  | 23.4 <sup>i</sup> q | 1.46 s              | <sup>12</sup> Aib-NH,3                         | <sup>12</sup> Aib-NH, <sup>13</sup> Pro-5b                       |
|                   | NH |                     | 7.78 s              |                                                | <sup>13</sup> Pro-5b, <sup>12</sup> Aib-3,4                      |
| <sup>13</sup> Pro | 1  | 173.4 s             |                     | <sup>14</sup> Leu-NH, <sup>13</sup> Pro-2,3a   |                                                                  |
|                   | 2  | 63.0 d              | 4.21 t (8.1)        | <sup>13</sup> Pro-4,5b                         | <sup>14</sup> Leu-NH,5, <sup>13</sup> Pro-4,3b                   |
|                   | 3a | 28.8 t              | 1.58 m              | <sup>13</sup> Pro-2,5b                         | <sup>13</sup> Pro-3b                                             |
|                   | 3b |                     | 2.22 m              |                                                | <sup>13</sup> Pro-3a,2,5b,4                                      |
|                   | 4  | 25.9 t              | 1.84 m              | <sup>13</sup> Pro-2,3a,3b,5b                   | <sup>13</sup> Pro-2,3b,5a,5b                                     |
|                   | 5a | 48.7 t              | 3.38 m              | <sup>13</sup> Pro-3b                           | <sup>13</sup> Pro-4,5b                                           |
|                   | 5b |                     | 3.71 m              |                                                | <sup>13</sup> Pro-4, 5a, <sup>12</sup> Aib-NH,3                  |
| <sup>14</sup> Leu | 1  | 173.7               |                     | <sup>15</sup> Aib-NH, <sup>14</sup> Leu-2      |                                                                  |
|                   | 2  | 53.1 d              | 3.94 m              | <sup>14</sup> Leu-4                            | <sup>14</sup> Leu-4,3a,3b,6,NH, <sup>15</sup> Aib-NH             |
|                   | 3a | 38.7 t              | 1.51 m              | <sup>14</sup> Leu-2,4,5,6                      | <sup>14</sup> Leu-2,3b,6                                         |
|                   | 3b |                     | 1.78 m              |                                                | <sup>14</sup> Leu-2,3a,5,6,NH                                    |
|                   | 4  | 24.8 d              | 1.67 m              | <sup>14</sup> Leu-5                            | <sup>14</sup> Leu-2, NH                                          |
|                   | 5  | 23.0 q              | 0.91 d (6.4)        | <sup>14</sup> Leu-3b,4,6                       | <sup>14</sup> Leu-3b, <sup>13</sup> Pro-2, <sup>11</sup> Leu-2   |
|                   | 6  | 21.1 q              | 0.82 d              | <sup>14</sup> Leu-4,5                          | <sup>14</sup> Leu-2,3a,3b                                        |
|                   | NH |                     | 7.74 m              |                                                | <sup>14</sup> Leu-2,3b,4, <sup>13</sup> Pro-2                    |
| <sup>15</sup> Aib | 1  | 175.4 s             |                     | <sup>16</sup> Ile-NH, <sup>15</sup> Aib-NH,3,4 |                                                                  |
|                   | 2  | 56.3 s              |                     | <sup>15</sup> Aib-NH,3,4                       |                                                                  |
|                   | 3  | 26.3 <sup>g</sup> q | 1.42 <sup>j</sup> s | <sup>15</sup> Aib-3,NH                         | <sup>15</sup> Aib-NH                                             |
|                   | 4  | 23.4 <sup>i</sup> q | 1.35 <sup>k</sup> s | <sup>15</sup> Aib-4                            | <sup>15</sup> Aib-NH                                             |
|                   | NH |                     | 7.63 s              |                                                | <sup>15</sup> Aib-3,4, <sup>16</sup> Ile-NH, <sup>14</sup> Leu-2 |

Table S2. Cont.

|                     |                   |                     |                        |                                                                    |                                                        |
|---------------------|-------------------|---------------------|------------------------|--------------------------------------------------------------------|--------------------------------------------------------|
| <sup>16</sup> Ile   | 1                 | 172.0 s             |                        | <sup>17</sup> Gln-NH, <sup>16</sup> Ile-2                          |                                                        |
|                     | 2                 | 58.9 d              | 3.91 m                 | <sup>16</sup> Ile-6,4b                                             | <sup>16</sup> Ile-NH,5,6,4a,4b,3                       |
|                     | 3                 | 35.6 d              | 1.87 m                 | <sup>16</sup> Ile-2,4a,4b,5,6,NH                                   | <sup>16</sup> Ile-NH, 2,6                              |
|                     | 4a                | 25.0 t              | 1.20 m                 | <sup>16</sup> Ile-2,3,5,6                                          | <sup>16</sup> Ile-NH,2,4b                              |
|                     | 4b                |                     | 1.47 m                 |                                                                    | <sup>16</sup> Ile-NH,2,4a,5                            |
|                     | 5                 | 11.4 q              | 0.81 t                 | <sup>16</sup> Ile-4a                                               | <sup>16</sup> Ile-4b,2                                 |
|                     | 6                 | 15.7 q              | 0.85 d (6.8)           | <sup>16</sup> Ile-4a,2                                             | <sup>16</sup> Ile-NH,2,3                               |
|                     | NH                |                     | 6.96 d (7.0)           |                                                                    | <sup>16</sup> Ile-2,3,4a,4b,6, <sup>15</sup> Aib-NH    |
| <sup>17</sup> Gln   | 1                 | 171.5 s             |                        | <sup>18</sup> Gln-NH, <sup>17</sup> Gln-2,3a,3b                    |                                                        |
|                     | 2                 | 53.8 d              | 4.03 m                 | <sup>17</sup> Gln-NH,4a,4b                                         | <sup>17</sup> Gln-NH,3a,3b,4a,4b                       |
|                     | 3a                | 27.1 t              | 1.85 m                 | <sup>17</sup> Gln-2,4a,4b                                          | <sup>17</sup> Gln-NH,2                                 |
|                     | 3b                |                     | 1.94 m                 |                                                                    | <sup>17</sup> Gln-NH,2                                 |
|                     | 4a                | 31.7 <sup>i</sup> t | 2.08 m                 | <sup>17</sup> Gln-NH <sub>2</sub> a,2,3b                           | <sup>17</sup> Gln-NH,2                                 |
|                     | 4b                |                     | 2.18 m                 |                                                                    | <sup>17</sup> Gln-NH,2,NH <sub>2</sub> b               |
|                     | 5                 | 173.7 s             |                        | <sup>17</sup> Gln-4a,4b,NH <sub>2</sub> a,NH <sub>2</sub> b        |                                                        |
|                     | NH <sub>2</sub> a |                     | 6.72 (s)               |                                                                    | <sup>17</sup> Gln-NH <sub>2</sub> b                    |
|                     | NH <sub>2</sub> b |                     | 7.13 (s)               |                                                                    | <sup>17</sup> Gln-NH <sub>2</sub> a,4b                 |
|                     | NH                |                     | 7.69 d (6.4)           |                                                                    | <sup>17</sup> Gln-2,3a,3b,4a,4b                        |
| <sup>18</sup> Gln   | 1                 | 170.9 s             |                        | <sup>19</sup> Pheol-NH, <sup>18</sup> Gln-2,3a,3b                  |                                                        |
|                     | 2                 | 53.1 d              | 4.04 m                 | <sup>18</sup> Gln-NH,3b,4a,4b,NH                                   | <sup>19</sup> PheOH-NH,                                |
|                     | 3a                | 27.7                | 1.83 m                 | <sup>18</sup> Gln-2,4a,4b                                          | <sup>18</sup> Gln-NH,3a,3b,4a,4b                       |
|                     | 3b                |                     | 1.70 m                 |                                                                    | <sup>18</sup> Gln-NH,2,3b,4a                           |
|                     | 4a                | 31.7 <sup>i</sup> t | 2.03 m                 | <sup>18</sup> Gln-NH <sub>2</sub> a,2,3a                           | <sup>18</sup> Gln-NH,2,3a,4b                           |
|                     | 4b                |                     | 1.97 m                 |                                                                    | <sup>18</sup> Gln-2,3a                                 |
|                     | 5                 | 173.7               |                        | <sup>18</sup> Gln-NH <sub>2</sub> a, NH <sub>2</sub> b,3a,3b,4a,4b | <sup>18</sup> Gln-NH,NH <sub>2</sub> b,2,3b            |
|                     | NH <sub>2</sub> a |                     | 6.64 s                 |                                                                    | <sup>18</sup> Gln-NH <sub>2</sub> b                    |
|                     | NH <sub>2</sub> b |                     | 7.10 s                 |                                                                    | <sup>18</sup> Gln-NH <sub>2</sub> a,4b                 |
|                     | NH                |                     | 7.47 d (7.9)           |                                                                    | <sup>18</sup> Gln-2,3a,3b,4b                           |
| <sup>19</sup> Pheol | 1a                | 62.7 t              | 3.28 m                 | <sup>19</sup> Pheol-3a,3b,OH                                       | <sup>19</sup> Pheol-OH,NH                              |
|                     | 1b                |                     | 3.32 m                 |                                                                    | <sup>19</sup> Pheol-OH,NH                              |
|                     | 2                 | 52.6 d              | 3.86 m                 | <sup>19</sup> Pheol-1a,1b,3a,3b,NH,OH                              | <sup>19</sup> Pheol-OH,NH,3a,3b,5                      |
|                     | 3a                | 36.7 t              | 2.61 dd<br>(13.7, 8.4) | <sup>19</sup> Pheol-1a,1b,2,5,NH                                   | <sup>19</sup> Pheol-NH,2,3b,5                          |
|                     | 3b                |                     | 2.83 dd<br>(13.6, 5.2) |                                                                    | <sup>19</sup> Pheol-,2,3a,5,OH                         |
|                     | 4                 | 139.2 s             |                        | <sup>19</sup> Pheol-2,3a,3b,5                                      |                                                        |
|                     | 5                 | 129.4 d             | 7.20 m                 | <sup>19</sup> Pheol-3a,3b,6,7                                      | <sup>19</sup> Pheol-2,3a,3b                            |
|                     | 6                 | 128.2 d             | 7.19 m                 | <sup>19</sup> Pheol-5,6                                            |                                                        |
|                     | 7                 | 126.0 d             | 7.11 m                 | <sup>19</sup> Pheol-5,6                                            |                                                        |
|                     | OH                |                     | 4.70 t (5.7)           |                                                                    | <sup>19</sup> PheOH-1a,1b 2,3b,NH                      |
|                     | NH                |                     | 7.27 d (8.6)           |                                                                    | <sup>18</sup> Gln-2, <sup>19</sup> Pheol-1a,1b,2,3a,OH |

<sup>a</sup> Carried out on an AVANCE-400 Bruker instrument; <sup>b</sup> Multiplicity and assignment are from HSQC experiment; <sup>c</sup> Values determined from HMBC experiment; <sup>n</sup>J<sub>CH</sub> = 8 Hz, recycle time 1 s; <sup>d</sup> Selected NOE's from a ROESY experiment; e,f,g,h,i,j,k These signals may interchange.



Table S3. NMR data for TA1895<sup>a</sup> (3) in DMSO-*d*<sub>6</sub>.

| Position         | $\delta_C$ , mult. <sup>b</sup> | $\delta_H$ , mult., <i>J</i> (Hz) | LR C-H correlations <sup>c</sup>             | NOE correlations <sup>d</sup>                                |                                                  |
|------------------|---------------------------------|-----------------------------------|----------------------------------------------|--------------------------------------------------------------|--------------------------------------------------|
| Ac               | 1                               | 171.2 s                           | Ac-2, <sup>1</sup> Aib-NH                    |                                                              |                                                  |
|                  | 2                               | 23.3 q                            | 1.92 s                                       | <sup>1</sup> Aib-NH,3,4                                      |                                                  |
| <sup>1</sup> Aib | 1                               | 176.0 s                           | <sup>2</sup> Ala-NH, <sup>1</sup> Aib-NH,3,4 |                                                              |                                                  |
|                  | 2                               | 55.8 <sup>f</sup> s               | <sup>1</sup> Aib-NH,3,4                      |                                                              |                                                  |
|                  | 3                               | 26.8 q                            | 1.35 s                                       | <sup>1</sup> Aib-NH                                          |                                                  |
|                  | 4                               | 24.2 q                            | 1.32 s                                       | <sup>1</sup> Aib-3                                           |                                                  |
|                  | NH                              |                                   | 8.57 s                                       | Ac-2, <sup>1</sup> Aib-3,4                                   |                                                  |
| <sup>2</sup> Ala | 1                               | 174.6 s                           | <sup>3</sup> Ala-NH, <sup>2</sup> Ala-2,3    |                                                              |                                                  |
|                  | 2                               | 51.0 d                            | 3.98 m                                       | <sup>2</sup> Ala-NH,3                                        |                                                  |
|                  | 3                               | 16.8 q                            | 1.31 d                                       | <sup>2</sup> Ala-NH,2                                        |                                                  |
|                  | NH                              |                                   | 8.27 d (5.4)                                 | <sup>3</sup> Ala-NH, <sup>2</sup> Ala-2,3                    |                                                  |
| <sup>3</sup> Ala | 1                               | 174.8 s                           | <sup>4</sup> Aib-NH, <sup>3</sup> Ala-2,3,NH |                                                              |                                                  |
|                  | 2                               | 51.3 d                            | 3.99 m                                       | <sup>3</sup> Ala-NH,3, <sup>4</sup> Aib-NH                   |                                                  |
|                  | 3                               | 16.1 q                            | 1.33 d                                       | <sup>3</sup> Ala-NH,2                                        |                                                  |
|                  | NH                              |                                   | 7.69 d (5.6)                                 | <sup>2</sup> Ala-NH, <sup>3</sup> Ala-2,3                    |                                                  |
| <sup>4</sup> Aib | 1                               | 175.0 s                           | <sup>5</sup> Aib-NH                          |                                                              |                                                  |
|                  | 2                               | 56.0 s                            | <sup>4</sup> Aib-NH,3,4                      |                                                              |                                                  |
|                  | 3                               | 25.8 <sup>j</sup> q               | 1.39 <sup>k</sup> s                          | <sup>4</sup> Aib-NH,4                                        | <sup>4</sup> Aib-NH                              |
|                  | 4                               | 22.6 <sup>h</sup> q               | 1.38 s                                       | <sup>4</sup> Aib-3                                           | <sup>4</sup> Aib-NH                              |
|                  | NH                              |                                   | 7.81 s                                       |                                                              | <sup>4</sup> Aib-2,3, <sup>3</sup> Ala-2         |
| <sup>5</sup> Aib | 1                               | 176.0 s                           | <sup>6</sup> Gln-NH, <sup>5</sup> Aib-3,4,NH |                                                              |                                                  |
|                  | 2                               | 55.7 <sup>f</sup> s               | <sup>5</sup> Aib-NH,3,4                      |                                                              |                                                  |
|                  | 3                               | 26.7 <sup>g</sup> s               | 1.42 <sup>m</sup> s                          | <sup>5</sup> Aib-NH,4                                        | <sup>5</sup> Aib-NH                              |
|                  | 4                               | 22.8 <sup>h</sup> q               | 1.37 <sup>l</sup> s                          | <sup>5</sup> Aib-3                                           | <sup>5</sup> Aib-NH                              |
|                  | NH                              |                                   | 7.53 s                                       |                                                              | <sup>5</sup> Aib-3,4                             |
| <sup>6</sup> Gln | 1                               | 174.1 s                           | <sup>7</sup> Aib-NH, <sup>6</sup> Gln-2      |                                                              |                                                  |
|                  | 2                               | 56.4 d                            | 3.73 m                                       | <sup>6</sup> Gln-NH,3,4a,4b                                  | <sup>7</sup> Aib-NH, <sup>6</sup> Gln-NH,3,4a,4b |
|                  | 3                               | 26.5 t                            | 1.99 m                                       | <sup>6</sup> Gln-2,4a,4b                                     | <sup>6</sup> Gln-2,NH, <sup>7</sup> Aib-NH       |
|                  | 4a                              | 31.5 <sup>i</sup> t               | 2.13 m                                       | <sup>6</sup> Gln-2,3,NH <sub>2</sub> b                       | <sup>6</sup> Gln-2, NH, NH <sub>2</sub> a        |
|                  | 4b                              |                                   | 2.23 m                                       |                                                              | <sup>6</sup> Gln-NH,2, NH <sub>2</sub> a         |
|                  | 5                               | 173.6 <sup>e</sup> s              |                                              | <sup>6</sup> Gln-3,4a,4b,NH <sub>2</sub> a,NH <sub>2</sub> b |                                                  |
|                  | NH <sub>2</sub> a               |                                   | 7.13 s                                       |                                                              | <sup>6</sup> Gln-4a,4b,NH <sub>2</sub> b         |
|                  | NH <sub>2</sub> b               |                                   | 6.75 s                                       |                                                              | <sup>6</sup> Gln-NH <sub>2</sub> a               |
|                  | NH                              |                                   | 7.74 m                                       |                                                              | <sup>6</sup> Gln-2,3,4a,4b                       |
| <sup>7</sup> Aib | 1                               | 176.0 s                           | <sup>8</sup> Aib-NH, <sup>7</sup> Aib-NH,3,4 |                                                              |                                                  |
|                  | 2                               | 56.0 s                            | <sup>7</sup> Aib-NH,3,4                      |                                                              |                                                  |
|                  | 3                               | 26.2 <sup>j</sup> q               | 1.41 <sup>k</sup> s                          | <sup>7</sup> Aib-NH,4                                        | <sup>7</sup> Aib-NH                              |
|                  | 4                               | 23.0 <sup>h</sup> q               | 1.37 <sup>l</sup> s                          | <sup>7</sup> Aib-NH                                          | <sup>7</sup> Aib-NH                              |
|                  | NH                              |                                   | 7.89 s                                       |                                                              | <sup>6</sup> Gln-2,3, <sup>7</sup> Aib-3,4       |
| <sup>8</sup> Aib | 1                               | 176.2 s                           | <sup>9</sup> Ala-NH, <sup>8</sup> Aib-3,4,NH |                                                              |                                                  |
|                  | 2                               | 56.0 s                            | <sup>8</sup> Aib-NH,3,4                      |                                                              |                                                  |
|                  | 3                               | 26.8 q                            | 1.45 s                                       | <sup>8</sup> Aib-NH,4                                        | <sup>8</sup> Aib-NH                              |
|                  | 4                               | 23.2 <sup>h</sup> q               | 1.35 <sup>l</sup> s                          | <sup>8</sup> Aib-3                                           | <sup>8</sup> Aib-NH                              |
|                  | NH                              |                                   | 7.58 s                                       |                                                              | <sup>8</sup> Aib-3,4                             |

Table S3. Cont.

|                   |    |          |              |                                                |                                                                  |
|-------------------|----|----------|--------------|------------------------------------------------|------------------------------------------------------------------|
| <sup>9</sup> Ala  | 1  | 174.6 s  |              | <sup>10</sup> Ser-NH, <sup>9</sup> Ala-2,3     |                                                                  |
|                   | 2  | 51.8 d   | 3.93 m       | <sup>9</sup> Ala-3                             | <sup>9</sup> Ala-NH,3                                            |
|                   | 3  | 16.5 q   | 1.40 d       | <sup>9</sup> Ala-2,NH                          | <sup>9</sup> Ala-NH,2                                            |
|                   | NH |          | 7.73 m       |                                                | <sup>9</sup> Ala-2,3                                             |
| <sup>10</sup> Ser | 1  | 170.7 s  |              | <sup>11</sup> Leu-NH, <sup>10</sup> Ser-2,3a   |                                                                  |
|                   | 2  | 58.2 d   | 4.09 m       | <sup>10</sup> Ser-OH                           | <sup>10</sup> Ser-NH,3a,3b                                       |
|                   | 3a | 61.1 t   | 3.72 m       | <sup>10</sup> Ser-NH,2,OH                      | <sup>10</sup> Ser-NH,2,OH                                        |
|                   | 3b |          | 3.77 m       |                                                | <sup>10</sup> Ser-NH,2,OH                                        |
|                   | OH |          | 4.85 t (6.1) |                                                | <sup>10</sup> Ser-NH,3a,3b                                       |
|                   | NH |          | 7.77 m       |                                                | <sup>10</sup> Ser-2,3a,3b,OH                                     |
| <sup>11</sup> Leu | 1  | 173.3 s  |              | <sup>12</sup> Aib-NH                           |                                                                  |
|                   | 2  | 51.5 d   | 4.27 m       | <sup>11</sup> Leu-NH                           | <sup>11</sup> Leu-NH,4,5,3a,3b, <sup>12</sup> Aib-NH             |
|                   | 3a | 39.5 t   | 1.52 m       | <sup>11</sup> Leu-5,6                          | <sup>11</sup> Leu-2,6                                            |
|                   | 3b |          | 1.65 m       |                                                | <sup>11</sup> Leu-NH,6                                           |
|                   | 4  | 24.2 d   | 1.68 m       | <sup>11</sup> Leu-5,6                          | <sup>11</sup> Leu-NH,5,6                                         |
|                   | 5  | 21.0 q   | 0.77 d (6.4) | <sup>11</sup> Leu-6,3b                         | <sup>11</sup> Leu-2,4                                            |
|                   | 6  | 23.1 q   | 0.83 d (7.2) | <sup>11</sup> Leu-5,3b                         | <sup>11</sup> Leu-4,3a,3b                                        |
|                   | NH |          | 7.44 d       |                                                | <sup>11</sup> Leu-2,3b,4                                         |
| <sup>12</sup> Aib | 1  | 172.7 s  |              | <sup>12</sup> Aib-NH,3,4                       |                                                                  |
|                   | 2  | 56.4 s   |              | <sup>12</sup> Aib-NH,3,4                       |                                                                  |
|                   | 3  | 26.3 g q | 1.38 m s     | <sup>12</sup> Aib-NH                           | <sup>12</sup> Aib-NH                                             |
|                   | 4  | 23.1 q   | 1.45 s       | <sup>12</sup> Aib-NH                           | <sup>12</sup> Aib-NH, <sup>13</sup> Pro-5b                       |
|                   | NH |          | 7.91 s       |                                                | <sup>13</sup> Pro-5b, <sup>11</sup> Leu-2, <sup>12</sup> Aib-3,4 |
| <sup>13</sup> Pro | 1  | 173.8 s  |              | <sup>14</sup> Leu-NH, <sup>13</sup> Pro-2,3a   |                                                                  |
|                   | 2  | 63.0 d   | 4.23 t (7.6) | <sup>13</sup> Pro-4                            | <sup>14</sup> Val-NH, <sup>13</sup> Pro-4,3b                     |
|                   | 3a | 28.8 t   | 1.64 m       | <sup>13</sup> Pro-2,5b                         | <sup>13</sup> Pro-3b                                             |
|                   | 3b |          | 2.22 m       |                                                | <sup>13</sup> Pro-3a,2,4                                         |
|                   | 4  | 25.8 t   | 1.84 m       | <sup>13</sup> Pro-5b                           | <sup>13</sup> Pro-2,3b,5a                                        |
|                   | 5a | 48.6 t   | 3.47 m       | <sup>13</sup> Pro-3a,3b                        | <sup>13</sup> Pro-4,5b                                           |
|                   | 5b |          | 3.69 m       |                                                | <sup>13</sup> Pro-5a, <sup>12</sup> Aib-NH,4                     |
| <sup>14</sup> Val | 1  | 172.7    |              | <sup>15</sup> Aib-NH, <sup>14</sup> Val-2      |                                                                  |
|                   | 2  | 61.0 d   | 3.76 m       | <sup>14</sup> Val-3,4,5                        | <sup>14</sup> Val-4,3,NH, <sup>15</sup> Aib-NH                   |
|                   | 3  | 28.8 d   | 2.22 m       | <sup>14</sup> Val-2,4,5                        | <sup>14</sup> Val-2,4,5                                          |
|                   | 4  | 19.1 q   | 0.93 d (6.4) | <sup>14</sup> Val-5,2,3                        | <sup>14</sup> Val-NH,2,3                                         |
|                   | 5  | 19.1 q   | 0.86 d (8.0) | <sup>14</sup> Val-4,2,3                        | <sup>14</sup> Val-2,3                                            |
|                   | NH |          | 7.59 m       |                                                | <sup>14</sup> Val-2,3,4, <sup>13</sup> Pro-2                     |
| <sup>15</sup> Aib | 1  | 175.7 s  |              | <sup>16</sup> Ile-NH, <sup>15</sup> Aib-NH,3,4 |                                                                  |
|                   | 2  | 56.4 s   |              | <sup>15</sup> Aib-NH,3,4                       |                                                                  |
|                   | 3  | 26.4 g q | 1.43 s       | <sup>15</sup> Aib-NH,3                         | <sup>15</sup> Aib-NH                                             |
|                   | 4  | 23.4 h q | 1.37 l s     | <sup>15</sup> Aib-4                            | <sup>15</sup> Aib-NH                                             |
|                   | NH |          | 7.48 s       |                                                | <sup>15</sup> Aib-3,4, <sup>14</sup> Val-2                       |

Table S3. Cont.

|                     |                   |                      |                     |                                                               |                                                  |
|---------------------|-------------------|----------------------|---------------------|---------------------------------------------------------------|--------------------------------------------------|
| <sup>16</sup> Ile   | 1                 | 172.4 s              |                     | <sup>17</sup> Gln-NH, <sup>16</sup> Ile-2,3                   |                                                  |
|                     | 2                 | 59.6 d               | 3.84 t              | <sup>16</sup> Ile-NH,6                                        | <sup>16</sup> Ile-NH,6,3, <sup>17</sup> Gln-NH   |
|                     | 3                 | 35.5 d               | 1.88 m              | <sup>16</sup> Ile-2,4a,5,6                                    | <sup>16</sup> Ile-NH,2,6                         |
|                     | 4a                | 25.4 t               | 1.20 m              | <sup>16</sup> Ile-2,5,6                                       | <sup>16</sup> Ile-NH,4b                          |
|                     | 4b                |                      | 1.47 m              |                                                               | <sup>16</sup> Ile-NH,4a                          |
|                     | 5                 | 11.4 q               | 0.81 t              | <sup>16</sup> Ile-4a                                          |                                                  |
|                     | 6                 | 15.7 q               | 0.85 d (7.2)        | <sup>16</sup> Ile-4a,2                                        | <sup>16</sup> Ile-2,3                            |
|                     | NH                |                      | 7.22 m              |                                                               | <sup>16</sup> Ile-2,3,4a,4b                      |
| <sup>17</sup> Gln   | 1                 | 171.8 s              |                     | <sup>18</sup> Gln-NH, <sup>17</sup> Gln-2                     |                                                  |
|                     | 2                 | 54.3 d               | 3.95 m              | <sup>17</sup> Gln-NH,4a,4b                                    | <sup>17</sup> Gln-NH,3,4a,4b                     |
|                     | 3                 | 26.8 t               | 1.90 m              | <sup>17</sup> Gln-2,4a,4b                                     | <sup>17</sup> Gln-NH,2                           |
|                     | 4a                | 31.8 <sup>i</sup> t  | 2.13 m              | <sup>17</sup> Gln-NH <sub>2</sub> a,2,3                       | <sup>17</sup> Gln-NH,2, NH <sub>2</sub> b        |
|                     | 4b                |                      | 2.23 m              |                                                               | <sup>17</sup> Gln-NH,2, NH <sub>2</sub> b        |
|                     | 5                 | 173.7 <sup>e</sup> s |                     | <sup>17</sup> Gln-3,4a,4b,NH <sub>2</sub> a,NH <sub>2</sub> b |                                                  |
|                     | NH <sub>2</sub> a |                      | 6.72 (s)            |                                                               | <sup>17</sup> Gln-NH <sub>2</sub> b              |
|                     | NH <sub>2</sub> b |                      | 7.13 (s)            |                                                               | <sup>17</sup> Gln-NH <sub>2</sub> a,4a,4b        |
|                     | NH                |                      | 7.69 d (5.6)        |                                                               | <sup>17</sup> Gln-2,3,4a,4b, <sup>16</sup> Ile-2 |
| <sup>18</sup> Gln   | 1                 | 171.0 s              |                     | <sup>19</sup> Pheol-NH, <sup>18</sup> Gln-2                   |                                                  |
|                     | 2                 | 53.4 d               | 4.00 m              | <sup>18</sup> Gln-4a,4b                                       | <sup>19</sup> Pheol-NH,                          |
|                     | 3a                | 27.5 d               | 1.81 m              | <sup>18</sup> Gln-2,4a,4b                                     | <sup>18</sup> Gln-NH,3a,4a,4b                    |
|                     | 3b                |                      | 1.70 m              |                                                               | <sup>18</sup> Gln-2,3b,4a,4b                     |
|                     | 4a                | 31.7 <sup>i</sup> t  | 2.04 m              | <sup>18</sup> Gln-NH <sub>2</sub> a,2                         | <sup>18</sup> Gln-NH, 3a,4a,4b                   |
|                     | 4b                |                      | 1.97 m              |                                                               | <sup>18</sup> Gln-2,3a,3b,NH <sub>2</sub> b,NH   |
|                     | 5                 | 173.8 <sup>e</sup> s |                     | <sup>18</sup> Gln-NH <sub>2</sub> a,NH <sub>2</sub> b,4a,4b   | <sup>18</sup> Gln-NH,2,3a,3b                     |
|                     | NH <sub>2</sub> a |                      | 6.62 s              |                                                               | <sup>18</sup> Gln-NH <sub>2</sub> b              |
|                     | NH <sub>2</sub> b |                      | 7.07 s              |                                                               | <sup>18</sup> Gln-NH <sub>2</sub> a,4a           |
| NH                  |                   | 7.44 d               |                     | <sup>18</sup> Gln-2,3b,4a,4b                                  |                                                  |
| <sup>19</sup> Pheol | 1a                | 62.9 t               | 3.30 m              | <sup>19</sup> Pheol-3a,3b,OH                                  |                                                  |
|                     | 1b                |                      | 3.32 m              |                                                               |                                                  |
|                     | 2                 | 52.6 d               | 3.84 t (6.0)        | <sup>19</sup> Pheol-1a,1b,3a,3b,NH,OH                         | <sup>19</sup> Pheol-OH,NH,3b,5                   |
|                     | 3a                | 36.7 t               | 2.61 dd (13.5, 8.4) | <sup>19</sup> Pheol-1a,1b,2,5                                 | <sup>19</sup> Pheol-NH,3b,5                      |
|                     | 3b                |                      | 2.83 dd (13.5, 5.1) |                                                               | <sup>19</sup> Pheol-NH,2,3a                      |
|                     | 4                 | 139.3 s              |                     | <sup>19</sup> Pheol-3a,3b, 6                                  |                                                  |
|                     | 5                 | 129.4 d              | 7.22 m              | <sup>19</sup> Pheol-3a,3b,5,7                                 | <sup>19</sup> Pheol-2,3a                         |
|                     | 6                 | 128.1 d              | 7.18 m              | <sup>19</sup> Pheol-6                                         |                                                  |
|                     | 7                 | 126.0 d              | 7.11 m              | <sup>19</sup> Pheol-5                                         |                                                  |
|                     | OH                |                      | 4.69 t (5.9)        |                                                               | <sup>19</sup> PheOH-2,NH                         |
|                     | NH                |                      | 7.15 m              |                                                               | <sup>18</sup> Gln-2,                             |
|                     |                   |                      |                     | <sup>19</sup> Pheol-2,3a,3b,OH                                |                                                  |

<sup>a</sup> Carried out on an AVANCE-400, Bruker instrument; <sup>b</sup> Multiplicity and assignment are from HSQC experiment; <sup>c</sup> Values determined from HMBC experiment; <sup>n</sup>J<sub>CH</sub> = 8 Hz, recycle time 1 s; <sup>d</sup> Selected NOE's from a ROESY experiment; e,f,g,h,i,j,k,l,m These signals may interchange.

Table S4. NMR data for TA1896<sup>a</sup> (4) in DMSO-*d*<sub>6</sub>.

| Position         | $\delta_C$ , mult. <sup>b</sup> | $\delta_H$ , mult., <i>J</i> (Hz) | LR C-H correlations <sup>c</sup>             | NOE correlations <sup>d</sup>                                |                                                                 |
|------------------|---------------------------------|-----------------------------------|----------------------------------------------|--------------------------------------------------------------|-----------------------------------------------------------------|
| Ac               | 1                               | 171.1 s                           | Ac-2, <sup>1</sup> Aib-NH                    |                                                              |                                                                 |
|                  | 2                               | 23.2 q                            | 1.92 s                                       | <sup>1</sup> Aib-NH                                          |                                                                 |
| <sup>1</sup> Aib | 1                               | 175.9 <sup>e</sup> s              | <sup>2</sup> Ala-NH, <sup>1</sup> Aib-NH,3,4 |                                                              |                                                                 |
|                  | 2                               | 55.8 s                            | <sup>1</sup> Aib-NH,3,4                      |                                                              |                                                                 |
|                  | 3                               | 26.5 <sup>g</sup> q               | 1.35 s                                       | <sup>1</sup> Aib-NH                                          | <sup>1</sup> Aib-NH                                             |
|                  | 4                               | 24.1 q                            | 1.32 s                                       | <sup>1</sup> Aib-3                                           | <sup>1</sup> Aib-NH                                             |
|                  | NH                              |                                   | 8.58 s                                       |                                                              | Ac-2, <sup>1</sup> Aib-3,4, <sup>2</sup> Ala-NH                 |
| <sup>2</sup> Ala | 1                               | 174.6 s                           | <sup>3</sup> Ala-NH, <sup>2</sup> Ala-2,3    |                                                              |                                                                 |
|                  | 2                               | 51.0 d                            | 3.98 m                                       | <sup>2</sup> Ala-NH,3                                        | <sup>2</sup> Ala-NH,3                                           |
|                  | 3                               | 16.8 q                            | 1.31 d                                       | <sup>2</sup> Ala-NH,2                                        | <sup>2</sup> Ala-NH,2                                           |
|                  | NH                              |                                   | 8.27 d (5.0)                                 |                                                              | <sup>3</sup> Ala-NH, <sup>2</sup> Ala-2,3                       |
| <sup>3</sup> Ala | 1                               | 174.8 s                           | <sup>4</sup> Aib-NH, <sup>3</sup> Ala-2,3,NH |                                                              |                                                                 |
|                  | 2                               | 51.3 d                            | 3.98 m                                       | <sup>3</sup> Ala-NH,3                                        | <sup>3</sup> Ala-NH,3, <sup>4</sup> Aib-NH                      |
|                  | 3                               | 16.1 q                            | 1.33 d                                       | <sup>2</sup> Ala-NH,2                                        | <sup>3</sup> Ala-NH,2                                           |
|                  | NH                              |                                   | 7.70 d (6.0)                                 |                                                              | <sup>2</sup> Ala-NH, <sup>3</sup> Ala-2,3                       |
| <sup>4</sup> Aib | 1                               | 175.0 s                           | <sup>5</sup> Aib-NH                          |                                                              |                                                                 |
|                  | 2                               | 55.7 <sup>f</sup> s               | <sup>4</sup> Aib-NH,3,4                      |                                                              |                                                                 |
|                  | 3                               | 26.2 <sup>g</sup> q               | 1.43 <sup>i</sup> s                          | <sup>4</sup> Aib-NH,4                                        | <sup>4</sup> Aib-NH                                             |
|                  | 4                               | 23.4 <sup>h</sup> q               | 1.38 <sup>j</sup> s                          | <sup>4</sup> Aib-3                                           | <sup>4</sup> Aib-NH                                             |
|                  | NH                              |                                   | 7.82 s                                       |                                                              | <sup>4</sup> Aib-2,3, <sup>3</sup> Ala-2, <sup>5</sup> Aib-NH   |
| <sup>5</sup> Aib | 1                               | 175.9 <sup>e</sup> s              | <sup>6</sup> Gln-NH, <sup>5</sup> Aib-3,NH   |                                                              |                                                                 |
|                  | 2                               | 55.8 <sup>f</sup> s               | <sup>5</sup> Aib-NH,3,4                      |                                                              |                                                                 |
|                  | 3                               | 26.5 <sup>g</sup> q               | 1.43 <sup>i</sup> s                          | <sup>5</sup> Aib-4                                           | <sup>5</sup> Aib-NH                                             |
|                  | 4                               | 22.6 <sup>h</sup> q               | 1.35 s                                       | <sup>5</sup> Aib-NH,3                                        | <sup>5</sup> Aib-NH                                             |
|                  | NH                              |                                   | 7.53 s                                       |                                                              | <sup>5</sup> Aib-3,4, <sup>4</sup> Aib-NH                       |
| <sup>6</sup> Gln | 1                               | 174.1 s                           | <sup>7</sup> Aib-NH, <sup>6</sup> Gln-2      |                                                              |                                                                 |
|                  | 2                               | 56.4 d                            | 3.74 m                                       | <sup>6</sup> Gln-NH,3,4a,4b                                  | <sup>7</sup> Aib-NH, <sup>6</sup> Gln-NH,3,4a,4b                |
|                  | 3                               | 26.2 t                            | 1.99 m                                       | <sup>6</sup> Gln-2,4a,4b,NH                                  | <sup>6</sup> Gln-2,4a,4b,NH, <sup>7</sup> Aib-NH                |
|                  | 4a                              | 31.5 t                            | 2.13 m                                       | <sup>6</sup> Gln-2,3,NH <sub>2</sub> b                       | <sup>6</sup> Gln-2,3,NH,NH <sub>2</sub> a                       |
|                  | 4b                              |                                   | 2.23 m                                       |                                                              | <sup>6</sup> Gln-NH,2,3,NH <sub>2</sub> a                       |
|                  | 5                               | 173.6 s                           |                                              | <sup>6</sup> Gln-3,4a,4b,NH <sub>2</sub> a,NH <sub>2</sub> b |                                                                 |
|                  | NH <sub>2</sub> a               |                                   | 7.17 s                                       |                                                              | <sup>6</sup> Gln-4a,4b,NH <sub>2</sub> b                        |
|                  | NH <sub>2</sub> b               |                                   | 6.75 s                                       |                                                              | <sup>6</sup> Gln-NH <sub>2</sub> a                              |
| NH               |                                 | 7.74 m                            |                                              | <sup>6</sup> Gln-2,3,4a,4b                                   |                                                                 |
| <sup>7</sup> Aib | 1                               | 176.0 <sup>e</sup> s              | <sup>8</sup> Aib-NH, <sup>7</sup> Aib-NH,3,4 |                                                              |                                                                 |
|                  | 2                               | 55.9 <sup>f</sup> s               | <sup>7</sup> Aib-NH,3,4                      |                                                              |                                                                 |
|                  | 3                               | 26.5 <sup>g</sup> q               | 1.44 s                                       | <sup>7</sup> Aib-NH,4                                        | <sup>7</sup> Aib-NH                                             |
|                  | 4                               | 22.7 <sup>h</sup> q               | 1.39 <sup>j</sup> s                          | <sup>7</sup> Aib-NH                                          | <sup>7</sup> Aib-NH                                             |
|                  | NH                              |                                   | 7.89 s                                       |                                                              | <sup>6</sup> Gln-2,3, <sup>7</sup> Aib-3,4, <sup>8</sup> Aib-NH |
| <sup>8</sup> Aib | 1                               | 176.2 s                           | <sup>9</sup> Ala-NH, <sup>8</sup> Aib-3,4    |                                                              |                                                                 |
|                  | 2                               | 56.0 <sup>f</sup> s               | <sup>8</sup> Aib-NH,3,4                      |                                                              |                                                                 |
|                  | 3                               | 26.8 <sup>g</sup> q               | 1.46 s                                       | <sup>8</sup> Aib-NH,4                                        | <sup>8</sup> Aib-NH                                             |
|                  | 4                               | 23.3 <sup>h</sup> q               | 1.39 <sup>j</sup> s                          | <sup>8</sup> Aib-3                                           | <sup>8</sup> Aib-NH                                             |
|                  | NH                              |                                   | 7.58 s                                       |                                                              | <sup>8</sup> Aib-3,4, <sup>7</sup> Aib-NH                       |

Table S4. Cont.

|                   |    |          |              |                                                |                                                                        |
|-------------------|----|----------|--------------|------------------------------------------------|------------------------------------------------------------------------|
| <sup>9</sup> Ala  | 1  | 174.6 s  |              | <sup>10</sup> Ser-NH, <sup>9</sup> Ala-2,3     |                                                                        |
|                   | 2  | 51.8 d   | 3.93 m       | <sup>9</sup> Ala-3                             | <sup>9</sup> Ala-NH,3                                                  |
|                   | 3  | 16.5 q   | 1.40 d       | <sup>9</sup> Ala-2,NH                          | <sup>9</sup> Ala-NH,2                                                  |
|                   | NH |          | 7.73 m       |                                                | <sup>9</sup> Ala-2,3                                                   |
| <sup>10</sup> Ser | 1  | 170.7 s  |              | <sup>11</sup> Leu-NH, <sup>10</sup> Ser-2,3a   |                                                                        |
|                   | 2  | 58.2 d   | 4.09 m       | <sup>10</sup> Ser-OH,3b                        | <sup>10</sup> Ser-NH,3a,3b                                             |
|                   | 3a | 61.1 t   | 3.73 m       | <sup>10</sup> Ser-NH,2,OH                      | <sup>10</sup> Ser-NH,2,OH                                              |
|                   | 3b |          | 3.77 m       |                                                | <sup>10</sup> Ser-NH,2,OH                                              |
|                   | OH |          | 4.85 t (6.0) |                                                | <sup>10</sup> Ser-NH, 3a,3b                                            |
|                   | NH |          | 7.76 m       |                                                | <sup>10</sup> Ser-2,3a,3b,OH, <sup>11</sup> Leu-NH                     |
| <sup>11</sup> Leu | 1  | 173.3 s  |              | <sup>12</sup> Aib-NH, <sup>11</sup> Leu-2      |                                                                        |
|                   | 2  | 51.5 d   | 4.27 m       | <sup>11</sup> Leu-NH,3b                        | <sup>11</sup> Leu-NH,4,5,3a,3b, <sup>12</sup> Aib-NH                   |
|                   | 3a | 39.5 t   | 1.53 m       | <sup>11</sup> Leu-5,6,4                        | <sup>11</sup> Leu-2,5,6                                                |
|                   | 3b |          | 1.66 m       |                                                | <sup>11</sup> Leu-NH,6,5                                               |
|                   | 4  | 24.2 d   | 1.69 m       | <sup>11</sup> Leu-5,6                          | <sup>11</sup> Leu-NH,5,6                                               |
|                   | 5  | 20.8 q   | 0.77 d       | <sup>11</sup> Leu-6                            | <sup>11</sup> Leu-2,4,3a,3b                                            |
|                   | 6  | 22.9 h q | 0.83 d       | <sup>11</sup> Leu-5                            | <sup>11</sup> Leu-4,3a,3b                                              |
|                   | NH |          | 7.43 m       |                                                | <sup>11</sup> Leu-2,3b,4, <sup>12</sup> Aib-NH, <sup>10</sup> Ser-NH   |
| <sup>12</sup> Aib | 1  | 172.8 s  |              | <sup>12</sup> Aib-NH,3,4                       |                                                                        |
|                   | 2  | 56.1 f s |              | <sup>12</sup> Aib-NH,3,4                       |                                                                        |
|                   | 3  | 26.4 g q | 1.36 s       | <sup>12</sup> Aib-NH                           | <sup>12</sup> Aib-NH, <sup>13</sup> Pro-5b                             |
|                   | 4  | 23.2 h q | 1.47 s       | <sup>12</sup> Aib-NH                           | <sup>12</sup> Aib-NH                                                   |
|                   | NH |          | 7.89 s       |                                                | <sup>13</sup> Pro-5a,5b, <sup>11</sup> Leu-2,NH, <sup>12</sup> Aib-3,4 |
| <sup>13</sup> Pro | 1  | 173.8 s  |              | <sup>14</sup> Val-NH, <sup>13</sup> Pro-2,3a   |                                                                        |
|                   | 2  | 63.0 d   | 4.21 t (7.5) | <sup>13</sup> Pro-4,5b,5a                      | <sup>14</sup> Val-NH, <sup>13</sup> Pro-4,3a,3b,5b                     |
|                   | 3a | 28.8 t   | 1.64 m       | <sup>13</sup> Pro-2,4,5b,5a                    | <sup>13</sup> Pro-3b,2,5a                                              |
|                   | 3b |          | 2.22 m       |                                                | <sup>13</sup> Pro-3a,2,4                                               |
|                   | 4  | 25.8 t   | 1.84 m       | <sup>13</sup> Pro-5b                           | <sup>13</sup> Pro-2,3b,5a,5b                                           |
|                   | 5a | 48.6 t   | 3.47 m       | <sup>13</sup> Pro-3a,3b,2,4                    | <sup>13</sup> Pro-3a,4,5b, <sup>12</sup> Aib-NH                        |
|                   | 5b |          | 3.69 m       |                                                | <sup>13</sup> Pro-5a,2, <sup>12</sup> Aib-3,NH                         |
| <sup>14</sup> Val | 1  | 172.6    |              | <sup>15</sup> Aib-NH, <sup>14</sup> Val-2      |                                                                        |
|                   | 2  | 61.1 d   | 3.68 m       | <sup>14</sup> Val-3,4,5,NH                     | <sup>14</sup> Val-4,3,NH, <sup>15</sup> Aib-NH                         |
|                   | 3  | 28.8 d   | 2.22 m       | <sup>14</sup> Val-2,4,5                        | <sup>14</sup> Val-2,4,5,NH                                             |
|                   | 4  | 19.1 k q | 0.93 d (6.5) | <sup>14</sup> Val-5,2,3                        | <sup>14</sup> Val-NH,2,3                                               |
|                   | 5  | 19.2 k q | 0.86 d       | <sup>14</sup> Val-4,2,3                        | <sup>14</sup> Val-2,3                                                  |
|                   | NH |          | 7.59 m       |                                                | <sup>14</sup> Val-2,3,4, <sup>13</sup> Pro-2                           |
| <sup>15</sup> Aib | 1  | 175.6 s  |              | <sup>16</sup> Ile-NH, <sup>15</sup> Aib-NH,3,4 |                                                                        |
|                   | 2  | 56.2 f s |              | <sup>15</sup> Aib-NH,3,4                       |                                                                        |
|                   | 3  | 26.2 g q | 1.42 i s     | <sup>15</sup> Aib-NH,4                         | <sup>15</sup> Aib-NH                                                   |
|                   | 4  | 22.9 h q | 1.35 s       | <sup>15</sup> Aib-3                            | <sup>15</sup> Aib-NH                                                   |
|                   | NH |          | 7.45 s       |                                                | <sup>15</sup> Aib-3,4, <sup>14</sup> Val-2                             |

Table S4. Cont.

|                     |                   |         |                     |                                                                       |                                                        |
|---------------------|-------------------|---------|---------------------|-----------------------------------------------------------------------|--------------------------------------------------------|
| <sup>16</sup> Ile   | 1                 | 172.3 s |                     | <sup>17</sup> Gln-NH, <sup>16</sup> Ile-2,3                           |                                                        |
|                     | 2                 | 59.5 d  | 3.87 t              | <sup>16</sup> Ile-NH,6,4a                                             | <sup>16</sup> Ile-NH,5,6,3,4a,4b, <sup>17</sup> Glu-NH |
|                     | 3                 | 35.5 d  | 1.88 m              | <sup>16</sup> Ile-2,4a,4b,5,6,NH                                      | <sup>16</sup> Ile-NH,2,6                               |
|                     | 4a                | 25.3 t  | 1.20 m              | <sup>16</sup> Ile-2,5,6,3                                             | <sup>16</sup> Ile-NH,4b,2                              |
|                     | 4b                |         | 1.47 m              |                                                                       | <sup>16</sup> Ile-NH,4a,2,5                            |
|                     | 5                 | 11.4 q  | 0.80 m              | <sup>16</sup> Ile-4a,4b                                               | <sup>16</sup> Ile-2,4a                                 |
|                     | 6                 | 15.7 q  | 0.85 m              | <sup>16</sup> Ile-4a,4b,2                                             | <sup>16</sup> Ile-2,3,NH                               |
|                     | NH                |         | 7.20 m              |                                                                       | <sup>16</sup> Ile-2,3,4a,4b,6                          |
| <sup>17</sup> Glu   | 1                 | 171.4 s |                     | <sup>18</sup> Gln-NH, <sup>17</sup> Glu-2                             |                                                        |
|                     | 2                 | 53.7 d  | 4.01 m              | <sup>17</sup> Glu-NH,4a,4b,3                                          | <sup>17</sup> Glu-NH,3,4a                              |
|                     | 3                 | 26.0 t  | 1.98 m              | <sup>17</sup> Glu-2,4a,4b,NH                                          | <sup>17</sup> Glu-NH,2,4a,4b                           |
|                     | 4a                | 30.2 t  | 2.41 m              | <sup>17</sup> Glu-2,3                                                 | <sup>17</sup> Glu-NH,2,3                               |
|                     | 4b                |         | 2.47 m              |                                                                       | <sup>17</sup> Glu-3                                    |
|                     | 5                 | 173.0 s |                     | <sup>17</sup> Glu-4a,4b,OCH <sub>3</sub>                              |                                                        |
|                     | NH                |         | 7.67 d (6.0)        |                                                                       | <sup>17</sup> Glu-2,3,4a, <sup>18</sup> Gln-NH         |
|                     | OCH <sub>3</sub>  | 51.4 q  | 3.55 s              |                                                                       |                                                        |
| <sup>18</sup> Gln   | 1                 | 170.9 s |                     | <sup>19</sup> Pheol-NH, <sup>18</sup> Gln-2,3b,3a                     |                                                        |
|                     | 2                 | 53.3 d  | 4.01 m              | <sup>18</sup> Gln-3a,3b,4a,4b, NH                                     | <sup>19</sup> Pheol-NH,                                |
|                     | 3a                | 27.5 d  | 1.83 m              | <sup>18</sup> Gln-2,4a,4b                                             | <sup>18</sup> Gln-NH,3a,3b,4a,4b                       |
|                     | 3b                |         | 1.70 m              |                                                                       | <sup>18</sup> Gln-2,3b,4a,4b                           |
|                     | 4a                | 31.7 t  | 2.05 m              | <sup>18</sup> Gln-NH <sub>2</sub> a,2,3a,3b                           | <sup>18</sup> Gln-NH,2,3a,4a,4b                        |
|                     | 4b                |         | 1.97 m              |                                                                       | <sup>18</sup> Gln-2,3a,3b,NH <sub>2</sub> b            |
|                     | 5                 | 173.5 s |                     | <sup>18</sup> Gln-NH <sub>2</sub> a,NH <sub>2</sub> b,<br>4a,4b,3a,3b | <sup>18</sup> Gln-NH, 2,3a,3b,NH <sub>2</sub> b        |
|                     | NH <sub>2</sub> a |         | 6.51 s              |                                                                       | <sup>18</sup> Gln-NH <sub>2</sub> b                    |
|                     | NH <sub>2</sub> b |         | 7.05 s              |                                                                       | <sup>18</sup> Gln-NH <sub>2</sub> a,4a,4b              |
|                     | NH                |         | 7.45 d              |                                                                       | <sup>18</sup> Gln-2,3b,4b                              |
| <sup>19</sup> Pheol | 1a                | 62.8 t  | 3.30 m              | <sup>19</sup> Pheol-2,3a,3b,OH                                        | <sup>19</sup> Pheol-OH,2,3a,3b                         |
|                     | 1b                |         | 3.33 m              |                                                                       | <sup>19</sup> Pheol-OH,2,3a,3b                         |
|                     | 2                 | 52.6 d  | 3.86 m              | <sup>19</sup> Pheol-1a,1b,3a,3b,NH, OH                                | <sup>19</sup> Pheol-OH,NH,3a,3b,5,1a,1b                |
|                     | 3a                | 36.7 t  | 2.61 dd (10.7, 6.7) | <sup>19</sup> Pheol-1a,1b,2,5                                         | <sup>19</sup> Pheol-NH,3b,1a,b,2                       |
|                     | 3b                |         | 2.83 dd (10.8,3.8)  |                                                                       | <sup>19</sup> Pheol-NH,5,2,3a,1a,1b,OH                 |
|                     | 4                 | 139.3 s |                     | <sup>19</sup> Pheol-2,3a,3b,5, 6                                      |                                                        |
|                     | 5                 | 129.4 d | 7.21 m              | <sup>19</sup> Pheol-3a,3b,5,7                                         | <sup>19</sup> Pheol-2,3b                               |
|                     | 6                 | 128.1 d | 7.19 m              | <sup>19</sup> Pheol-6                                                 |                                                        |
|                     | 7                 | 125.9 d | 7.11 m              | <sup>19</sup> Pheol-5                                                 |                                                        |
|                     | OH                |         | 4.67 t (5.8)        |                                                                       | <sup>19</sup> Pheol-2,3b,OH,1a,1b                      |
|                     | NH                |         | 7.18 m              |                                                                       | <sup>19</sup> PheOH-2,NH,3b,1a,1b                      |

<sup>a</sup> Carried out on an AVANCE-500, Bruker instrument; <sup>b</sup> Multiplicity and assignment are from HSQC experiment; <sup>c</sup> Values determined from HMBC experiment; <sup>n</sup>J<sub>CH</sub> = 8 Hz, recycle time 1 s; <sup>d</sup> Selected NOE's from a ROESY experiment; e,f,g,h,i,j These signals may interchange.

Table S5. NMR data for TA1924<sup>a</sup> (5) in DMSO-*d*<sub>6</sub>.

| Position         | $\delta_C$ , mult. <sup>b</sup> | $\delta_H$ , mult., <i>J</i> (Hz) | LR C-H correlations <sup>c</sup>                    | NOE correlations <sup>d</sup>                                |                                                                 |
|------------------|---------------------------------|-----------------------------------|-----------------------------------------------------|--------------------------------------------------------------|-----------------------------------------------------------------|
| Ac               | 1                               | 171.0 s                           | Ac-2, <sup>1</sup> Aib-NH                           |                                                              |                                                                 |
|                  | 2                               | 23.0 q                            | 1.92 s                                              | <sup>1</sup> Aib-NH                                          |                                                                 |
| <sup>1</sup> Aib | 1                               | 175.6 <sup>e</sup> s              | <sup>2</sup> Ala-NH, <sup>1</sup> Aib-NH,3,4        |                                                              |                                                                 |
|                  | 2                               | 55.8 s                            | <sup>1</sup> Aib-NH,3,4                             |                                                              |                                                                 |
|                  | 3                               | 26.5 q                            | 1.35 s                                              | <sup>1</sup> Aib-NH                                          | <sup>1</sup> Aib-NH                                             |
|                  | 4                               | 24.1 q                            | 1.32 s                                              | <sup>1</sup> Aib-3                                           | <sup>1</sup> Aib-NH                                             |
|                  | NH                              |                                   | 8.54 s                                              |                                                              | Ac-2, <sup>1</sup> Aib-3,4, <sup>2</sup> Ala-NH                 |
| <sup>2</sup> Ala | 1                               | 174.5 s                           | <sup>3</sup> Ala-NH, <sup>2</sup> Ala-2,3           |                                                              |                                                                 |
|                  | 2                               | 50.8 d                            | 4.00 m                                              | <sup>2</sup> Ala-NH,3                                        | <sup>2</sup> Ala-NH,3                                           |
|                  | 3                               | 16.8 q                            | 1.30 d                                              | <sup>2</sup> Ala-NH,2                                        | <sup>2</sup> Ala-NH,2                                           |
|                  | NH                              |                                   | 8.24 d (5.0)                                        |                                                              | <sup>2</sup> Ala-2,3, <sup>1</sup> Aib-NH, <sup>3</sup> Ala-NH  |
| <sup>3</sup> Ala | 1                               | 174.5 s                           | <sup>4</sup> Aib-NH, <sup>3</sup> Ala-2,3           |                                                              |                                                                 |
|                  | 2                               | 51.0 d                            | 4.02 m                                              | <sup>3</sup> Ala-NH,3                                        | <sup>3</sup> Ala-NH,3, <sup>4</sup> Aib-NH                      |
|                  | 3                               | 16.2 q                            | 1.33 d (7.5)                                        | <sup>2</sup> Ala-NH,2                                        | <sup>3</sup> Ala-NH,2                                           |
|                  | NH                              |                                   | 7.68 d (5.5)                                        |                                                              | <sup>4</sup> Aib-NH, <sup>3</sup> Ala-2,3, <sup>2</sup> Ala-NH  |
| <sup>4</sup> Aib | 1                               | 175.0 s                           | <sup>5</sup> Iva-NH, <sup>4</sup> Aib-3             |                                                              |                                                                 |
|                  | 2                               | 55.9 <sup>f</sup> s               | <sup>4</sup> Aib-NH,3,4                             |                                                              |                                                                 |
|                  | 3                               | 26.5q                             | 1.43 s                                              | <sup>4</sup> Aib-NH,4                                        | <sup>4</sup> Aib-NH                                             |
|                  | 4                               | 22.9 q                            | 1.35 s                                              | <sup>4</sup> Aib-NH,3                                        | <sup>4</sup> Aib-NH                                             |
|                  | NH                              |                                   | 7.86 s                                              |                                                              | <sup>4</sup> Aib-2,3, <sup>3</sup> Ala-NH,2                     |
| <sup>5</sup> Iva | 1                               | 176.4 s                           | <sup>6</sup> Gln-NH,2,<br><sup>5</sup> Iva-3a,3b,NH |                                                              |                                                                 |
|                  | 2                               | 58.6 s                            | <sup>5</sup> Iva-NH,3a,3b,4,5                       |                                                              |                                                                 |
|                  | 3a                              | 25.6 t                            | 2.20 m                                              | <sup>5</sup> Iva-4                                           | <sup>5</sup> Iva-NH,4,3b                                        |
|                  | 3b                              |                                   | 1.62 m                                              |                                                              | <sup>5</sup> Iva-4,3a                                           |
|                  | 4                               | 7.4 q                             | 0.73 t (7.5)                                        | <sup>5</sup> Iva-3a,3b                                       | <sup>5</sup> Iva-NH,3a,3b                                       |
|                  | 5                               | 22.7 <sup>h</sup> q               | 1.35 <sup>i</sup> s                                 | <sup>5</sup> Iva-NH,3a,3b                                    | <sup>5</sup> Iva-NH,                                            |
|                  | NH                              |                                   | 7.46 s                                              |                                                              | <sup>5</sup> Iva-4,5,3a                                         |
| <sup>6</sup> Gln | 1                               | 173.8 s                           | <sup>7</sup> Aib-NH, <sup>6</sup> Gln-2             |                                                              |                                                                 |
|                  | 2                               | 56.0 d                            | 3.78 m                                              | <sup>6</sup> Gln-NH,3,4a,4b                                  | <sup>7</sup> Aib-NH, <sup>6</sup> Gln-NH,3,4a,4b                |
|                  | 3                               | 26.2 t                            | 1.95 m                                              | <sup>6</sup> Gln-2,4a,4b,NH                                  | <sup>6</sup> Gln-2,4a,4b,NH, <sup>7</sup> Aib-NH                |
|                  | 4a                              | 31.7 <sup>j</sup> t               | 2.14 m                                              | <sup>6</sup> Gln-3,NH <sub>2</sub> b                         | <sup>6</sup> Gln-NH <sub>2</sub> a,2,3,4b,NH                    |
|                  | 4b                              |                                   | 2.23 m                                              |                                                              | <sup>6</sup> Gln-NH <sub>2</sub> a,2,3,4a,NH                    |
|                  | 5                               | 173.8 s                           |                                                     | <sup>6</sup> Gln-3,4a,4b,NH <sub>2</sub> a,NH <sub>2</sub> b |                                                                 |
|                  | NH <sub>2</sub> a               |                                   | 7.16 s                                              |                                                              | <sup>6</sup> Gln-4a,NH <sub>2</sub> b,4a,4b                     |
|                  | NH <sub>2</sub> b               |                                   | 6.74 s                                              |                                                              | <sup>6</sup> Gln-NH <sub>2</sub> a                              |
| NH               |                                 | 7.72 m                            |                                                     | <sup>6</sup> Gln-2,3,4a,4b                                   |                                                                 |
| <sup>7</sup> Aib | 1                               | 175.7 <sup>e</sup> s              | <sup>8</sup> Aib-NH, <sup>7</sup> Aib-NH,3,4        |                                                              |                                                                 |
|                  | 2                               | 55.9 <sup>f</sup> s               | <sup>7</sup> Aib-NH,3,4                             |                                                              |                                                                 |
|                  | 3                               | 26.2 q                            | 1.42 <sup>j</sup> s                                 | <sup>7</sup> Aib-NH                                          | <sup>7</sup> Aib-NH                                             |
|                  | 4                               | 22.6 <sup>h</sup> q               | 1.35 <sup>i</sup> s                                 | <sup>7</sup> Aib-NH                                          | <sup>7</sup> Aib-NH                                             |
|                  | NH                              |                                   | 7.84 s                                              |                                                              | <sup>6</sup> Gln-2,3, <sup>7</sup> Aib-3,4, <sup>8</sup> Aib-NH |

Table S5. Cont.

|                   |    |                      |                     |                                              |                                                                                                    |
|-------------------|----|----------------------|---------------------|----------------------------------------------|----------------------------------------------------------------------------------------------------|
| <sup>8</sup> Aib  | 1  | 175.9 <sup>e</sup> s |                     | <sup>9</sup> Aib-NH, <sup>8</sup> Aib-3,4    |                                                                                                    |
|                   | 2  | 56.1 <sup>f</sup> s  |                     | <sup>8</sup> Aib-NH,3,4                      |                                                                                                    |
|                   | 3  | 26.0 <sup>g</sup> q  | 1.42 <sup>j</sup> s | <sup>8</sup> Aib-NH                          | <sup>8</sup> Aib-NH                                                                                |
|                   | 4  | 22.8 <sup>h</sup> q  | 1.38 <sup>i</sup> s | <sup>8</sup> Aib-NH                          | <sup>8</sup> Aib-NH                                                                                |
|                   | NH |                      | 7.54 s              |                                              | <sup>8</sup> Aib-3,4, <sup>7</sup> Aib-NH, <sup>9</sup> Aib-NH                                     |
| <sup>9</sup> Aib  | 1  | 176.5 s              |                     | <sup>10</sup> Ser-NH, <sup>9</sup> Aib-3,4   |                                                                                                    |
|                   | 2  | 56.0 <sup>f</sup> s  |                     | <sup>9</sup> Aib-NH,3,4                      |                                                                                                    |
|                   | 3  | 26.2 <sup>g</sup> q  | 1.46 s              | <sup>9</sup> Aib-NH                          |                                                                                                    |
|                   | 4  | 23.0 <sup>h</sup> q  | 1.42 s              | <sup>9</sup> Aib-NH                          | <sup>9</sup> Aib-NH                                                                                |
|                   | NH |                      | 7.75 s              |                                              | <sup>9</sup> Aib-4, <sup>8</sup> Aib-NH                                                            |
| <sup>10</sup> Ser | 1  | 170.6 s              |                     | <sup>11</sup> Leu-NH, <sup>10</sup> Ser-2,3a |                                                                                                    |
|                   | 2  | 58.8 d               | 4.02 m              | <sup>10</sup> Ser-NH,3b                      | <sup>10</sup> Ser-NH,3a,3b, <sup>11</sup> Leu-NH                                                   |
|                   | 3a | 61.0 t               | 3.76 m              | <sup>10</sup> Ser-NH,2                       | <sup>10</sup> Ser-NH,2                                                                             |
|                   | 3b |                      | 3.78 m              |                                              | <sup>10</sup> Ser-NH,2                                                                             |
|                   | OH |                      |                     |                                              |                                                                                                    |
|                   | NH |                      | 7.73 m              |                                              | <sup>10</sup> Ser-2,3a,3b                                                                          |
| <sup>11</sup> Leu | 1  | 173.5 s              |                     | <sup>12</sup> Aib-NH, <sup>11</sup> Leu-2    |                                                                                                    |
|                   | 2  | 51.4 d               | 4.28 m              | <sup>11</sup> Leu-NH,4                       | <sup>12</sup> Aib-NH, <sup>11</sup> Leu-NH,5,3a,3b,4,<br><sup>13</sup> Pro-5a, <sup>14</sup> Val-4 |
|                   | 3a | 39.8 t               | 1.55 m              | <sup>11</sup> Leu-2,4,5,6                    | <sup>11</sup> Leu-2,5                                                                              |
|                   | 3b |                      | 1.68 m              |                                              | <sup>11</sup> Leu-NH,2,5,6                                                                         |
|                   | 4  | 24.1 d               | 1.69 m              | <sup>11</sup> Leu-5,6                        | <sup>11</sup> Leu-NH,2                                                                             |
|                   | 5  | 20.8 q               | 0.76 d (6.0)        | <sup>11</sup> Leu-6,3b                       | <sup>11</sup> Leu-2,3a,3b                                                                          |
|                   | 6  | 23.4 q               | 0.83 d              | <sup>11</sup> Leu-5,3a                       | <sup>11</sup> Leu-3b                                                                               |
|                   | NH |                      | 7.59 d (8.0)        |                                              | <sup>10</sup> Ser-2, <sup>11</sup> Leu-2,3b,4                                                      |
| <sup>12</sup> Aib | 1  | 172.8 s              |                     | <sup>12</sup> Aib-NH,3,4                     |                                                                                                    |
|                   | 2  | 56.1 <sup>f</sup> s  |                     | <sup>12</sup> Aib-NH,3,4                     |                                                                                                    |
|                   | 3  | 26.4 <sup>g</sup> q  | 1.38 s              | <sup>12</sup> Aib-NH                         | <sup>12</sup> Aib-NH                                                                               |
|                   | 4  | 22.6 q               | 1.48 s              | <sup>12</sup> Aib-NH                         | <sup>12</sup> Aib-NH, <sup>13</sup> Pro-5b,2                                                       |
|                   | NH |                      | 7.93 s              |                                              | <sup>13</sup> Pro-5a,5b, <sup>11</sup> Leu-2, <sup>12</sup> Aib-3,4                                |
| <sup>13</sup> Pro | 1  | 173.7 s              |                     | <sup>14</sup> Val-NH, <sup>13</sup> Pro-2,3a |                                                                                                    |
|                   | 2  | 63.0 d               | 4.22 t (7.5)        | <sup>13</sup> Pro-3a,3b,4,5b                 | <sup>14</sup> Val-NH, <sup>13</sup> Pro-4,3a,3b,5b,<br><sup>12</sup> Aib-3                         |
|                   | 3a | 28.7 t               | 1.65 m              | <sup>13</sup> Pro-2,5a,5b                    | <sup>13</sup> Pro-2,3b,5a                                                                          |
|                   | 3b |                      | 2.22 m              |                                              | <sup>13</sup> Pro-3a,2,5b,4                                                                        |
|                   | 4  | 26.0 t               | 1.86 m              | <sup>13</sup> Pro-2,3a,5a,5b                 | <sup>13</sup> Pro-2,3b,5a,5b                                                                       |
|                   | 5a | 48.5 t               | 3.52 m              | <sup>13</sup> Pro-3a,3b,2,4                  | <sup>13</sup> Pro-3a,4,5b, <sup>11</sup> Leu-2, <sup>14</sup> Val-NH,<br><sup>12</sup> Aib-NH      |
|                   | 5b |                      | 3.67 m              |                                              | <sup>13</sup> Pro-2,3b,4,5a, <sup>12</sup> Aib-NH,3                                                |
| <sup>14</sup> Val | 1  | 172.7 s              |                     | <sup>15</sup> Aib-NH, <sup>14</sup> Val-2    |                                                                                                    |
|                   | 2  | 61.1 d               | 3.72 m              | <sup>14</sup> Val-3,4,5,NH                   | <sup>14</sup> Val-4,5,3,NH, <sup>15</sup> Aib-NH                                                   |
|                   | 3  | 28.8 d               | 2.21 m              | <sup>14</sup> Val-2,4,5,NH                   | <sup>14</sup> Val-2,4,5,NH                                                                         |
|                   | 4  | 19.1 q               | 0.93 d (6.5)        | <sup>14</sup> Val-5,2,3                      | <sup>14</sup> Val-NH,2,3, <sup>11</sup> Leu-2                                                      |
|                   | 5  | 19.2 q               | 0.87 d (6.0)        | <sup>14</sup> Val-4,2,3                      | <sup>14</sup> Val-2,3                                                                              |
|                   | NH |                      | 7.58 m              |                                              | <sup>14</sup> Val-2,3,4, <sup>13</sup> Pro-2                                                       |



Table S5. Cont.

|                     |                   |          |                     |                                                                       |                                                                              |
|---------------------|-------------------|----------|---------------------|-----------------------------------------------------------------------|------------------------------------------------------------------------------|
| <sup>15</sup> Aib   | 1                 | 175.6 s  |                     | <sup>16</sup> Ile-NH,2, <sup>15</sup> Aib-NH,3,4                      |                                                                              |
|                     | 2                 | 55.9 f s |                     | <sup>15</sup> Aib-NH,3,4                                              |                                                                              |
|                     | 3                 | 26.6 g q | 1.42 j s            | <sup>15</sup> Aib-NH                                                  | <sup>15</sup> Aib-NH                                                         |
|                     | 4                 | 23.3 h q | 1.35 i s            | <sup>15</sup> Aib-NH                                                  | <sup>15</sup> Aib-NH                                                         |
|                     | NH                |          | 7.43 s              |                                                                       | <sup>15</sup> Aib-3,4, <sup>14</sup> Val-2                                   |
| <sup>16</sup> Ile   | 1                 | 172.2 s  |                     | <sup>17</sup> Glu-NH, <sup>16</sup> Ile-2                             |                                                                              |
|                     | 2                 | 59.5 d   | 3.88 m              | <sup>16</sup> Ile-NH,6,4a,4b,3                                        | <sup>16</sup> Ile-NH,6,4a,4b,3                                               |
|                     | 3                 | 35.5 d   | 1.88 m              | <sup>16</sup> Ile-2,4a,4b,5,6,NH                                      | <sup>16</sup> Ile-NH,2,6                                                     |
|                     | 4a                | 25.4 t   | 1.20 m              | <sup>16</sup> Ile-2,3,5,6                                             | <sup>16</sup> Ile-2,4b,NH                                                    |
|                     | 4b                |          | 1.50 m              |                                                                       | <sup>16</sup> Ile-NH,2,4a,5                                                  |
|                     | 5                 | 11.4 q   | 0.80 t (7.0)        | <sup>16</sup> Ile-4a,4b,3                                             | <sup>16</sup> Ile-4b                                                         |
|                     | 6                 | 15.7 q   | 0.84 d              | <sup>16</sup> Ile-4a,4b,3,2                                           | <sup>16</sup> Ile-NH,2,3                                                     |
|                     | NH                |          | 7.20 m              |                                                                       | <sup>16</sup> Ile-2,3,4a,4b,6                                                |
| <sup>17</sup> Glu   | 1                 | 171.6 s  |                     | <sup>18</sup> Gln-NH, <sup>17</sup> Glu-2                             |                                                                              |
|                     | 2                 | 53.8 d   | 4.01 m              | <sup>17</sup> Glu-NH,4a,4b                                            | <sup>18</sup> Gln-NH, <sup>17</sup> Glu-NH,3,4a,4b                           |
|                     | 3                 | 26.3 t   | 1.95 m              | <sup>17</sup> Glu-2,4a,4b                                             | <sup>17</sup> Glu-NH,2,4a,4b                                                 |
|                     | 4a                | 30.5 t   | 2.40 m              | <sup>17</sup> Glu-2,3                                                 | <sup>17</sup> Glu-NH,2,3,4b                                                  |
|                     | 4b                |          | 2.30 m              |                                                                       | <sup>17</sup> Glu-NH,2,3,4a                                                  |
|                     | 5                 | 173.0 s  |                     | <sup>17</sup> Glu-4a,4b,OCH <sub>3</sub>                              |                                                                              |
|                     | NH                |          | 7.68 d (5.5)        |                                                                       | <sup>17</sup> Glu-2,3,4a,4b, <sup>18</sup> Gln-NH                            |
| OCH <sub>3</sub>    | 51.4 q            | 3.55 s   |                     |                                                                       |                                                                              |
| <sup>18</sup> Gln   | 1                 | 170.9 s  |                     | <sup>19</sup> Pheol-NH, <sup>18</sup> Gln-2,3a,3b                     |                                                                              |
|                     | 2                 | 53.3 d   | 4.03 m              | <sup>18</sup> Gln-NH,3a,3b,4a,4b                                      | <sup>19</sup> Pheol-NH,<br><sup>18</sup> Gln-NH,3a,3b,4b                     |
|                     | 3a                | 27.5     | 1.81 m              | <sup>18</sup> Gln-2,4a,4b,NH                                          | <sup>18</sup> Gln-NH,2,3b,4a                                                 |
|                     | 3b                |          | 1.70 m              |                                                                       | <sup>18</sup> Gln-2,3a,4a                                                    |
|                     | 4a                | 31.6 j t | 2.05 m              | <sup>18</sup> Gln-NH <sub>2</sub> a,2,3a,3b                           | <sup>18</sup> Gln-3a,3b                                                      |
|                     | 4b                |          | 1.97 m              |                                                                       | <sup>18</sup> Gln-NH,NH <sub>2</sub> b,2                                     |
|                     | 5                 | 173.6 s  |                     | <sup>18</sup> Gln-NH <sub>2</sub> a,NH <sub>2</sub> b,3a,<br>3b,4a,4b |                                                                              |
|                     | NH <sub>2</sub> a |          | 6.61 s              |                                                                       | <sup>18</sup> Gln-NH <sub>2</sub> b                                          |
|                     | NH <sub>2</sub> b |          | 7.04 s              |                                                                       | <sup>18</sup> Gln-NH <sub>2</sub> a,4b                                       |
|                     | NH                |          | 7.44 d              |                                                                       | <sup>19</sup> Pheol-NH, <sup>18</sup> Gln-2,3b,4b,<br><sup>17</sup> Glu-NH,2 |
| <sup>19</sup> Pheol | 1a                | 62.8 t   | 3.30 m              | <sup>19</sup> Pheol-2,3a,3b                                           | <sup>19</sup> Pheol-NH,2,3a,3b                                               |
|                     | 1b                |          | 3.33 m              |                                                                       | <sup>19</sup> Pheol-NH,2,3a,3b                                               |
|                     | 2                 | 52.6 d   | 3.86 m              | <sup>19</sup> Pheol-1a,1b,3a,3b,NH                                    | <sup>19</sup> Pheol-NH,1a,1b,3a,3b,5                                         |
|                     | 3a                | 36.7 t   | 2.61 dd (10.6, 6.9) | <sup>19</sup> Pheol-1a,1b,2,5                                         | <sup>19</sup> Pheol-NH,1a,1b,2                                               |
|                     | 3b                |          | 2.84 dd (10.8, 4.0) |                                                                       | <sup>19</sup> Pheol-1a,1b,2                                                  |
|                     | 4                 | 139.3 s  |                     | <sup>19</sup> Pheol-2,3a,3b,6                                         |                                                                              |
|                     | 5                 | 129.4 d  | 7.21 m              | <sup>19</sup> Pheol-3a,3b,5,7                                         | <sup>19</sup> Pheol-2,3b,7                                                   |
|                     | 6                 | 128.1 d  | 7.19 m              | <sup>19</sup> Pheol-6                                                 |                                                                              |
|                     | 7                 | 126.0 d  | 7.11 m              | <sup>19</sup> Pheol-5                                                 | <sup>19</sup> Pheol-5                                                        |
|                     | OH                |          |                     |                                                                       |                                                                              |
|                     | NH                |          | 7.18 m              |                                                                       | <sup>18</sup> Gln-NH,2,<br><sup>19</sup> Pheol-1a,1b,2,3a                    |

<sup>a</sup> Carried out on an AVANCE-500, Bruker instrument; <sup>b</sup> Multiplicity and assignment are from HSQC experiment; <sup>c</sup> Values determined from HMBC experiment; <sup>n</sup>J<sub>CH</sub> = 8 Hz, recycle time 1 s; <sup>d</sup> Selected NOE's from a ROESY experiment; e,f,g,h,i,j These signals may interchange.

Table S6. NMR data for TA1910<sup>a</sup> (6) in DMSO-*d*<sub>6</sub>.

| Position          | $\delta_C$ , mult. <sup>b</sup> | $\delta_H$ , mult., J (Hz) | LR C-H correlations <sup>c</sup>                 | NOE correlations <sup>d</sup>                                |                                                                      |
|-------------------|---------------------------------|----------------------------|--------------------------------------------------|--------------------------------------------------------------|----------------------------------------------------------------------|
| Ac                | 1                               | 171.1 s                    | Ac-2, <sup>1</sup> Aib-NH                        |                                                              |                                                                      |
|                   | 2                               | 23.0 q                     | 1.92 s                                           | <sup>1</sup> Aib-NH                                          |                                                                      |
| <sup>1</sup> Aib  | 1                               | 175.8 s                    | <sup>2</sup> Ala-NH, <sup>1</sup> Aib-NH,3,4     |                                                              |                                                                      |
|                   | 2                               | 55.8 s                     | <sup>1</sup> Aib-NH,3,4                          |                                                              |                                                                      |
|                   | 3                               | 26.5 q                     | 1.35 s                                           | <sup>1</sup> Aib-NH                                          | <sup>1</sup> Aib-NH                                                  |
|                   | 4                               | 24.1 q                     | 1.33 s                                           | <sup>1</sup> Aib-3                                           | <sup>1</sup> Aib-NH                                                  |
|                   | NH                              |                            | 8.57 s                                           |                                                              | Ac-2, <sup>1</sup> Aib-3,4, <sup>2</sup> Ala-NH                      |
| <sup>2</sup> Ala  | 1                               | 174.6 s                    | <sup>3</sup> Ala-NH, <sup>2</sup> Ala-2,3        |                                                              |                                                                      |
|                   | 2                               | 50.9 d                     | 4.01 m                                           | <sup>2</sup> Ala-NH,3                                        | <sup>2</sup> Ala-NH,3                                                |
|                   | 3                               | 16.9 q                     | 1.31 d                                           | <sup>2</sup> Ala-NH,2                                        | <sup>2</sup> Ala-NH,2                                                |
|                   | NH                              |                            | 8.26 d (5.2)                                     |                                                              | <sup>2</sup> Ala-2,3, <sup>1</sup> Aib-NH, <sup>3</sup> Ala-NH       |
| <sup>3</sup> Ala  | 1                               | 174.6 s                    | <sup>4</sup> Aib-NH, <sup>3</sup> Ala-2,3        |                                                              |                                                                      |
|                   | 2                               | 51.1 d                     | 4.01 m                                           | <sup>3</sup> Ala-3,NH                                        | <sup>3</sup> Ala-NH,3, <sup>4</sup> Aib-NH                           |
|                   | 3                               | 16.2 q                     | 1.33 d (7.5)                                     | <sup>2</sup> Ala-NH,2                                        | <sup>3</sup> Ala-NH,2                                                |
|                   | NH                              |                            | 7.68 d (6.0)                                     |                                                              | <sup>4</sup> Aib-NH, <sup>3</sup> Ala-2,3, <sup>2</sup> Ala-NH       |
| <sup>4</sup> Aib  | 1                               | 175.0 s                    | <sup>5</sup> Iva-NH, <sup>4</sup> Aib-3          |                                                              |                                                                      |
|                   | 2                               | 56.4 s                     | <sup>4</sup> Aib-NH,3,4                          |                                                              |                                                                      |
|                   | 3                               | 26.0 gq                    | 1.45 f s                                         | <sup>4</sup> Aib-NH,4                                        | <sup>4</sup> Aib-NH                                                  |
|                   | 4                               | 23.1 e q                   | 1.35 g s                                         | <sup>4</sup> Aib-NH,3                                        | <sup>4</sup> Aib-NH                                                  |
|                   | NH                              |                            | 7.87 s                                           |                                                              | <sup>4</sup> Aib-2,3, <sup>3</sup> Ala-NH,2, <sup>5</sup> Iva-NH     |
| <sup>5</sup> Iva  | 1                               | 176.2 s                    | <sup>6</sup> Gln-NH,2, <sup>5</sup> Iva-3a,3b,NH |                                                              |                                                                      |
|                   | 2                               | 58.5 s                     | <sup>5</sup> Iva-NH,3a,3b,4,5                    |                                                              |                                                                      |
|                   | 3a                              | 25.8 t                     | 2.21 m                                           | <sup>5</sup> Iva-4                                           | <sup>5</sup> Iva-NH,4,3b                                             |
|                   | 3b                              |                            | 1.62 m                                           |                                                              | <sup>5</sup> Iva-4,3a,NH                                             |
|                   | 4                               | 7.4 q                      | 0.73 m                                           | <sup>5</sup> Iva-3a,3b                                       | <sup>5</sup> Iva-NH,3a,3b                                            |
|                   | 5                               | 22.7 q                     | 1.35 s                                           | <sup>5</sup> Iva-NH,3a,3b                                    | <sup>5</sup> Iva-NH                                                  |
|                   | NH                              |                            | 7.47 s                                           |                                                              | <sup>5</sup> Iva-4,5,3a,3b, <sup>6</sup> Gln-NH, <sup>4</sup> Aib-NH |
|                   | <sup>6</sup> Gln                | 1                          | 174.1 s                                          | <sup>7</sup> Aib-NH, <sup>6</sup> Gln-2                      |                                                                      |
| 2                 |                                 | 56.0 d                     | 3.78 m                                           | <sup>6</sup> Gln-NH,3,4a,4b                                  | <sup>7</sup> Aib-NH,4, <sup>6</sup> Gln-NH,3,4a,4b                   |
| 3                 |                                 | 26.2 t                     | 1.97 m                                           | <sup>6</sup> Gln-2,4a,4b,NH                                  | <sup>6</sup> Gln-2,4b,NH, <sup>7</sup> Aib-NH                        |
| 4a                |                                 | 31.6 t                     | 2.14 m                                           | <sup>6</sup> Gln-3,NH <sub>2</sub> b                         | <sup>6</sup> Gln-NH <sub>2</sub> a,2,4b,NH                           |
| 4b                |                                 |                            | 2.23 m                                           |                                                              | <sup>6</sup> Gln-NH <sub>2</sub> a,2,3,4a,NH                         |
| 5                 |                                 | 173.6 s                    |                                                  | <sup>6</sup> Gln-3,4a,4b,NH <sub>2</sub> a,NH <sub>2</sub> b |                                                                      |
| NH <sub>2</sub> a |                                 |                            | 7.16 s                                           |                                                              | <sup>6</sup> Gln-NH <sub>2</sub> b,4a,4b                             |
| NH <sub>2</sub> b |                                 |                            | 6.77 s                                           |                                                              | <sup>6</sup> Gln-NH <sub>2</sub> a                                   |
| NH                |                                 |                            | 7.73 m                                           |                                                              | <sup>6</sup> Gln-2,3,4a,4b, <sup>5</sup> Iva-NH                      |
| <sup>7</sup> Aib  | 1                               | 176.0 s                    | <sup>8</sup> Aib-NH, <sup>7</sup> Aib-NH,3,4     |                                                              |                                                                      |
|                   | 2                               | 56.4 h s                   | <sup>7</sup> Aib-NH,3,4                          |                                                              |                                                                      |
|                   | 3                               | 26.3 g q                   | 1.43 f s                                         | <sup>7</sup> Aib-NH,4                                        | <sup>7</sup> Aib-NH                                                  |
|                   | 4                               | 22.7 e q                   | 1.36 g s                                         | <sup>7</sup> Aib-3                                           | <sup>7</sup> Aib-NH, <sup>6</sup> Gln-2                              |
|                   | NH                              |                            | 7.90 s                                           |                                                              | <sup>6</sup> Gln-2,3, <sup>7</sup> Aib-3,4, <sup>8</sup> Aib-NH      |

Table S6. Cont.

|                   |    |             |              |                                                 |                                                                                                    |
|-------------------|----|-------------|--------------|-------------------------------------------------|----------------------------------------------------------------------------------------------------|
| <sup>8</sup> Aib  | 1  | 176.4 s     |              | <sup>9</sup> Ala-NH, <sup>8</sup> Aib-3,4       |                                                                                                    |
|                   | 2  | 56.0 s      |              | <sup>8</sup> Aib-NH,3,4                         |                                                                                                    |
|                   | 3  | 26.8 g q    | 1.45 f s     | <sup>8</sup> Aib-NH,4                           | <sup>8</sup> Aib-NH                                                                                |
|                   | 4  | 22.9 e q    | 1.35 g s     | <sup>8</sup> Aib-3                              | <sup>8</sup> Aib-NH                                                                                |
|                   | NH |             | 7.55 s       |                                                 | <sup>8</sup> Aib-3,4, <sup>7</sup> Aib-NH, <sup>9</sup> Ala-NH                                     |
| <sup>9</sup> Ala  | 1  | 174.6 s     |              | <sup>10</sup> Ser-NH, <sup>9</sup> Ala-2,3      |                                                                                                    |
|                   | 2  | 51.7 d      | 3.96 m       | <sup>9</sup> Ala-NH,3                           | <sup>9</sup> Ala-NH                                                                                |
|                   | 3  | 16.5 q      | 1.40 d       | <sup>9</sup> Ala-NH,3                           | <sup>9</sup> Ala-NH                                                                                |
|                   | NH |             | 7.72 s       |                                                 | <sup>9</sup> Ala-2,3, <sup>8</sup> Aib-NH                                                          |
| <sup>10</sup> Ser | 1  | 170.6 s     |              | <sup>11</sup> Leu-NH, <sup>10</sup> Ser-2,3a,3b |                                                                                                    |
|                   | 2  | 58.1 d      | 4.10 m       | <sup>10</sup> Ser-NH                            | <sup>10</sup> Ser-NH,3a,3b, <sup>11</sup> Leu-NH                                                   |
|                   | 3a | 61.1 t      | 3.73 m       | <sup>10</sup> Ser-NH,2                          | <sup>10</sup> Ser-2                                                                                |
|                   | 3b |             | 3.76 m       |                                                 | <sup>10</sup> Ser-NH,2                                                                             |
|                   | OH |             |              |                                                 |                                                                                                    |
|                   | NH |             | 7.76 d (6.0) |                                                 | <sup>10</sup> Ser-2,3b, <sup>11</sup> Leu-NH                                                       |
| <sup>11</sup> Leu | 1  | 173.3 s     |              | <sup>12</sup> Aib-NH, <sup>11</sup> Leu-2       |                                                                                                    |
|                   | 2  | 51.4 d      | 4.28 m       | <sup>11</sup> Leu-NH                            | <sup>12</sup> Aib-NH, <sup>11</sup> Leu-NH,5,3a,3b,4,<br><sup>13</sup> Pro-5a, <sup>14</sup> Val-4 |
|                   | 3a | 39.8 t      | 1.55 m       | <sup>11</sup> Leu-2,5,6                         | <sup>11</sup> Leu-2,5,4                                                                            |
|                   | 3b |             | 1.67 m       |                                                 | <sup>11</sup> Leu-NH,2,5,6                                                                         |
|                   | 4  | 24.2 d      | 1.69 m       | <sup>11</sup> Leu-5,6                           | <sup>11</sup> Leu-NH,2,3a                                                                          |
|                   | 5  | 20.9 q      | 0.78 d (6.8) | <sup>11</sup> Leu-6,3b                          | <sup>11</sup> Leu-2,3a,3b                                                                          |
|                   | 6  | 22.9 q      | 0.84 d       | <sup>11</sup> Leu-5,3a                          | <sup>11</sup> Leu-3b,2                                                                             |
|                   | NH |             | 7.44 d (8.0) |                                                 | <sup>10</sup> Ser-2,NH, <sup>11</sup> Leu-2,3b,4                                                   |
| <sup>12</sup> Aib | 1  | 172.8 s     |              | <sup>12</sup> Aib-NH,3,4                        |                                                                                                    |
|                   | 2  | 56.2 h s    |              | <sup>12</sup> Aib-NH,3,4                        |                                                                                                    |
|                   | 3  | 26.4 q      | 1.39 s       | <sup>12</sup> Aib-NH                            | <sup>12</sup> Aib-NH, <sup>13</sup> Pro-5b,2                                                       |
|                   | 4  | 23.0 q      | 1.46 s       | <sup>12</sup> Aib                               | <sup>12</sup> Aib-NH                                                                               |
|                   | NH |             | 7.91 s       |                                                 | <sup>13</sup> Pro-5a,5b, <sup>11</sup> Leu-2, <sup>12</sup> Aib-3,4                                |
| <sup>13</sup> Pro | 1  | 173.8 s     |              | <sup>14</sup> Val-NH, <sup>13</sup> Pro-2,3a,5b |                                                                                                    |
|                   | 2  | 63.0 d      | 4.22 t (7.6) | <sup>13</sup> Pro-3a,3b,4,5b                    | <sup>14</sup> Val-NH, <sup>13</sup> Pro-4,3a,3b,5b,5a                                              |
|                   | 3a | 28.7–28.8 t | 1.65 m       | <sup>13</sup> Pro-2,5a,5b,4                     | <sup>13</sup> Pro-2,3b, 5a                                                                         |
|                   | 3b |             | 2.22 m       |                                                 | <sup>13</sup> Pro-3a,2,5b,4                                                                        |
|                   | 4  | 25.9 t      | 1.86 m       | <sup>13</sup> Pro-2,3a,5b                       | <sup>13</sup> Pro-2,3b,5a,5b                                                                       |
|                   | 5a | 48.6 t      | 3.48 m       | <sup>13</sup> Pro-3a,3b,4                       | <sup>13</sup> Pro-2,3a,4,5b, <sup>11</sup> Leu-2,                                                  |
|                   | 5b |             | 3.70 m       |                                                 | <sup>14</sup> Val-NH, <sup>12</sup> Aib-NH<br><sup>13</sup> Pro-2,3b,4, 5a, <sup>12</sup> Aib-NH,3 |
| <sup>14</sup> Val | 1  | 172.7 s     |              | <sup>15</sup> Aib-NH, <sup>14</sup> Val-2       |                                                                                                    |
|                   | 2  | 61.1 d      | 3.68 m       | <sup>14</sup> Val-3,4,5,NH                      | <sup>14</sup> Val-4,5,3,NH, <sup>15</sup> Aib-NH                                                   |
|                   | 3  | 28.7–28.8 d | 2.21 m       | <sup>14</sup> Val-2,4,5,NH                      | <sup>14</sup> Val-2,4,5,NH                                                                         |
|                   | 4  | 19.2 q      | 0.94 d (6.4) | <sup>14</sup> Val-5,2,3                         | <sup>14</sup> Val-NH,2,3, <sup>11</sup> Leu-2                                                      |
|                   | 5  | 19.1 q      | 0.89 d (7.2) | <sup>14</sup> Val-4,2,3                         | <sup>14</sup> Val-2,3                                                                              |
|                   | NH |             | 7.59 d (6.8) |                                                 | <sup>14</sup> Val-2,3,4, <sup>13</sup> Pro-2,5a,<br><sup>15</sup> Aib-NH                           |

Table S6. Cont.

|                     |                   |                     |                     |                                                                               |                                                                              |
|---------------------|-------------------|---------------------|---------------------|-------------------------------------------------------------------------------|------------------------------------------------------------------------------|
| <sup>15</sup> Aib   | 1                 | 175.7 s             |                     | <sup>16</sup> Ile-NH,2, <sup>15</sup> Aib-NH,3,4                              |                                                                              |
|                     | 2                 | 56.1 <sup>h</sup> s |                     | <sup>15</sup> Aib-NH,3,4                                                      |                                                                              |
|                     | 3                 | 26.5 <sup>g</sup> q | 1.43 <sup>f</sup> s | <sup>15</sup> Aib-4                                                           | <sup>15</sup> Aib-NH                                                         |
|                     | 4                 | 23.3 <sup>e</sup> q | 1.38 <sup>g</sup> s | <sup>15</sup> Aib-NH,3                                                        | <sup>15</sup> Aib-NH                                                         |
|                     | NH                |                     | 7.43 s              |                                                                               | <sup>15</sup> Aib-3,4, <sup>14</sup> Val-NH,2,<br><sup>16</sup> Ile-NH       |
| <sup>16</sup> Ile   | 1                 | 172.3 s             |                     | <sup>17</sup> Glu-NH, <sup>16</sup> Ile-2                                     |                                                                              |
|                     | 2                 | 59.5 d              | 3.88 m              | <sup>16</sup> Ile-NH,6,4a,3                                                   | <sup>16</sup> Ile-NH,6,4a,4b,3, <sup>17</sup> Glu-NH                         |
|                     | 3                 | 35.5 d              | 1.88 m              | <sup>16</sup> Ile-2,4a,5,6,NH                                                 | <sup>16</sup> Ile-NH,2,6,4a                                                  |
|                     | 4a                | 25.4 t              | 1.20 m              | <sup>16</sup> Ile-2,5,6                                                       | <sup>16</sup> Ile-2,4b,NH,3                                                  |
|                     | 4b                |                     | 1.50 m              |                                                                               | <sup>16</sup> Ile-NH,2,4a,5                                                  |
|                     | 5                 | 11.4 q              | 0.81 m              | <sup>16</sup> Ile-4a,4b                                                       | <sup>16</sup> Ile-4b                                                         |
|                     | 6                 | 15.7 q              | 0.85 m              | <sup>16</sup> Ile-4a,4b,2                                                     | <sup>16</sup> Ile-NH,2,3                                                     |
|                     | NH                |                     | 7.21 m              |                                                                               | <sup>16</sup> Ile-2,3,4a,4b,6, <sup>17</sup> Glu-NH,<br><sup>15</sup> Aib-NH |
| <sup>17</sup> Glu   | 1                 | 171.4 s             |                     | <sup>18</sup> Gln-NH, <sup>17</sup> Glu-2                                     |                                                                              |
|                     | 2                 | 53.7 d              | 4.02 m              | <sup>17</sup> Glu-NH,4a,4b                                                    | <sup>17</sup> Glu-NH,3,4a,4b                                                 |
|                     | 3                 | 26.3 t              | 1.95 m              | <sup>17</sup> Glu-2,4a,4b                                                     | <sup>17</sup> Glu-NH,2                                                       |
|                     | 4a                | 30.2 t              | 2.49 m              | <sup>17</sup> Glu-2,3                                                         | <sup>17</sup> Glu-2,4b                                                       |
|                     | 4b                |                     | 2.40 m              |                                                                               | <sup>17</sup> Glu-NH,2,4a                                                    |
|                     | 5                 | 173.0 s             |                     | <sup>17</sup> Glu-4a,4b,OCH <sub>3</sub>                                      |                                                                              |
|                     | NH                |                     | 7.68 d (6.0)        |                                                                               | <sup>17</sup> Glu-2,3,4b, <sup>18</sup> Gln-NH,<br><sup>16</sup> Ile-NH,2    |
|                     | OCH <sub>3</sub>  | 51.4 q              | 3.55 s              |                                                                               |                                                                              |
| <sup>18</sup> Gln   | 1                 | 170.9 s             |                     | <sup>19</sup> Pheol-NH, <sup>18</sup> Gln-2                                   |                                                                              |
|                     | 2                 | 53.3 d              | 4.03 m              | <sup>18</sup> Gln-NH,3a,3b,4a,4b                                              | <sup>19</sup> PheOH-NH,<br><sup>18</sup> Gln-NH,3a,3b,4b                     |
|                     | 3a                | 27.5 s              | 1.83 m              | <sup>18</sup> Gln-2,4a,4b,NH                                                  | <sup>18</sup> Gln-NH,2,3b,4a                                                 |
|                     | 3b                |                     | 1.72 m              |                                                                               | <sup>18</sup> Gln-2,3a,4a                                                    |
|                     | 4a                | 31.7 s              | 2.05 m              | <sup>18</sup> Gln-NH <sub>2</sub> a,2,3a,3b                                   | <sup>18</sup> Gln-3a,3b,NH                                                   |
|                     | 4b                |                     | 1.98 m              |                                                                               | <sup>18</sup> Gln-NH, NH <sub>2</sub> b,2                                    |
|                     | 5                 | 173.6               |                     | <sup>18</sup> Gln-NH <sub>2</sub> a,NH <sub>2</sub> b,3a,3b,4a,4b             |                                                                              |
|                     | NH <sub>2</sub> a |                     | 6.63 s              |                                                                               | <sup>18</sup> Gln-NH <sub>2</sub> b                                          |
|                     | NH <sub>2</sub> b |                     | 7.07 s              |                                                                               | <sup>18</sup> Gln-NH <sub>2</sub> a,4b                                       |
| NH                  |                   | 7.46 d              |                     | <sup>19</sup> Pheol-NH, <sup>18</sup> Gln-2,3b,4a,4b,<br><sup>17</sup> Glu-NH |                                                                              |
| <sup>19</sup> Pheol | 1a                | 62.8 t              | 3.30 m              | <sup>19</sup> Pheol-2,3a,3b                                                   | <sup>19</sup> Pheol-NH,2,3a,3b                                               |
|                     | 1b                |                     | 3.33 m              |                                                                               | <sup>19</sup> Pheol-NH,2,3a,3b                                               |
|                     | 2                 | 52.6 d              | 3.86 m              | <sup>19</sup> Pheol-1a,1b,3a,3b,NH                                            | <sup>19</sup> Pheol-NH,1a,1b,3a,3b,5                                         |
|                     | 3a                | 36.7 t              | 2.62 dd (13.5, 8.5) | <sup>19</sup> Pheol-1a,1b,2,5                                                 | <sup>19</sup> Pheol-NH,1a,1b,2                                               |
|                     | 3b                |                     | 2.84 dd (13.6, 5.0) |                                                                               | <sup>19</sup> Pheol-1a,1b,2,5                                                |
|                     | 4                 | 139.3 s             |                     | <sup>19</sup> Pheol-2,3a,3b,6                                                 |                                                                              |
|                     | 5                 | 129.4 d             | 7.22 m              | <sup>19</sup> Pheol-3a,3b,5,7                                                 | <sup>19</sup> Pheol-2,3b                                                     |
|                     | 6                 | 128.1 d             | 7.20 m              | <sup>19</sup> Pheol-6                                                         |                                                                              |
|                     | 7                 | 126.0 d             | 7.12 m              | <sup>19</sup> Pheol-5                                                         |                                                                              |
|                     | OH                |                     |                     |                                                                               |                                                                              |
|                     | NH                |                     | 7.19 m              |                                                                               | <sup>18</sup> Gln-NH,2, <sup>19</sup> Pheol-1a,1b,2,3a                       |

<sup>a</sup> Carried out on an AVANCE-400, Bruker instrument; <sup>b</sup> Multiplicity and assignment are from HSQC experiment; <sup>c</sup> Values determined from HMBC experiment; <sup>n</sup>J<sub>CH</sub> = 8 Hz, recycle time 1 s; <sup>d</sup> Selected NOE's from a ROESY experiment; <sup>e,f,g,h</sup> These signals may interchange.

Table S7. NMR data for TA1924a <sup>a</sup> (7) in DMSO-*d*<sub>6</sub>.

| Position         | $\delta_C$ , mult. <sup>b</sup> | $\delta_H$ , mult., <i>J</i> (Hz) | LR C-H correlations <sup>c</sup>             | NOE correlations <sup>d</sup>                                |                                                                  |
|------------------|---------------------------------|-----------------------------------|----------------------------------------------|--------------------------------------------------------------|------------------------------------------------------------------|
| Ac               | 1                               | 171.1 s                           | Ac-2, <sup>1</sup> Aib-NH                    |                                                              |                                                                  |
|                  | 2                               | 23.1 q                            | 1.93 s                                       | <sup>1</sup> Aib-NH,3,4                                      |                                                                  |
| <sup>1</sup> Aib | 1                               | 175.9 <sup>e</sup> s              | <sup>2</sup> Ala-NH, <sup>1</sup> Aib-NH,3,4 |                                                              |                                                                  |
|                  | 2                               | 55.7 <sup>f</sup> s               | <sup>1</sup> Aib-NH,3,4                      |                                                              |                                                                  |
|                  | 3                               | 26.5 q                            | 1.36 s                                       | <sup>1</sup> Aib-NH                                          | <sup>1</sup> Aib-NH                                              |
|                  | 4                               | 24.1 q                            | 1.32 s                                       | <sup>1</sup> Aib-3                                           | <sup>1</sup> Aib-NH                                              |
|                  | NH                              |                                   | 8.57 s                                       |                                                              | Ac-2, <sup>1</sup> Aib-3,4                                       |
| <sup>2</sup> Ala | 1                               | 174.6 s                           | -                                            | <sup>3</sup> Ala-NH, <sup>2</sup> Ala-2,3                    |                                                                  |
|                  | 2                               | 50.9 d                            | 4.01 m                                       | <sup>2</sup> Ala-NH,3                                        | <sup>2</sup> Ala-NH,3                                            |
|                  | 3                               | 16.8 q                            | 1.31 d                                       | <sup>2</sup> Ala-NH,2                                        | <sup>2</sup> Ala-NH,2                                            |
|                  | NH                              |                                   | 8.27 d (5.4)                                 |                                                              | <sup>3</sup> Ala-NH, <sup>2</sup> Ala-2,3                        |
| <sup>3</sup> Ala | 1                               | 174.7 s                           | -                                            | <sup>4</sup> Aib-NH, <sup>3</sup> Ala-2,3                    |                                                                  |
|                  | 2                               | 51.2 d                            | 4.01 m                                       | <sup>3</sup> Ala-NH,3                                        | <sup>3</sup> Ala-NH,3, <sup>4</sup> Aib-NH                       |
|                  | 3                               | 16.1 q                            | 1.33 d                                       | <sup>2</sup> Ala-NH,2                                        | <sup>3</sup> Ala-NH,2                                            |
|                  | NH                              |                                   | 7.71 m                                       |                                                              | <sup>4</sup> Aib-NH, <sup>2</sup> Ala-NH, <sup>3</sup> Ala-2,3   |
| <sup>4</sup> Aib | 1                               | 175.0 s                           |                                              | <sup>5</sup> Aib-NH, <sup>4</sup> Aib-NH,3,4                 |                                                                  |
|                  | 2                               | 56.0 <sup>f</sup> s               |                                              | <sup>4</sup> Aib-NH,3,4                                      |                                                                  |
|                  | 3                               | 26.1 q                            | 1.45 s                                       | <sup>4</sup> Aib-NH,4                                        | <sup>4</sup> Aib-NH                                              |
|                  | 4                               | 22.5 <sup>g</sup> q               | 1.38 <sup>i</sup> s                          | <sup>4</sup> Aib-3                                           | <sup>4</sup> Aib-NH                                              |
|                  | NH                              |                                   | 7.83 s                                       |                                                              | <sup>4</sup> Aib-4,3, <sup>3</sup> Ala-NH,2, <sup>5</sup> Aib-NH |
| <sup>5</sup> Aib | 1                               | 176.0 <sup>e</sup> s              |                                              | <sup>6</sup> Gln-NH, <sup>5</sup> Aib-NH,3,4                 |                                                                  |
|                  | 2                               | 55.8 <sup>f</sup> s               |                                              | <sup>5</sup> Aib-NH,3a,3b,4,5                                |                                                                  |
|                  | 3                               | 26.6 q                            | 1.44 s                                       | <sup>5</sup> Aib-NH,4                                        | <sup>5</sup> Aib-NH                                              |
|                  | 4                               | 22.7 <sup>g</sup> q               | 1.36 <sup>i</sup> s                          | <sup>5</sup> Aib-3                                           | <sup>5</sup> Aib-NH,                                             |
|                  | NH                              |                                   | 7.55 s                                       |                                                              | <sup>5</sup> Aib-3,4, <sup>4</sup> Aib-NH                        |
| <sup>6</sup> Gln | 1                               | 173.8 s                           |                                              | <sup>7</sup> Aib-NH, <sup>6</sup> Gln-2,3                    |                                                                  |
|                  | 2                               | 56.0 d                            | 3.77 m                                       | <sup>6</sup> Gln-NH,3,4a,4b                                  | <sup>7</sup> Aib-NH, <sup>6</sup> Gln-NH,3,4a,4b                 |
|                  | 3                               | 26.2 t                            | 1.97 m                                       | <sup>6</sup> Gln-2,4a,4b,NH                                  | <sup>6</sup> Gln-2, NH, <sup>7</sup> Aib-NH                      |
|                  | 4a                              | 31.5 <sup>g</sup> t               | 2.15 m                                       | <sup>6</sup> Gln-2,3,NH <sub>2</sub> b                       | <sup>6</sup> Gln-2,4b,NH <sub>2</sub> a                          |
|                  | 4b                              |                                   | 2.23 m                                       |                                                              | <sup>6</sup> Gln-2,4a,NH <sub>2</sub> a                          |
|                  | 5                               | 173.7 s                           |                                              | <sup>6</sup> Gln-3,4a,4b,NH <sub>2</sub> a,NH <sub>2</sub> b |                                                                  |
|                  | NH <sub>2</sub> a               |                                   | 7.16 s                                       |                                                              | <sup>6</sup> Gln-4a,4b,NH <sub>2</sub> b                         |
|                  | NH <sub>2</sub> b               |                                   | 6.76 s                                       |                                                              | <sup>6</sup> Gln-NH <sub>2</sub> a                               |
| NH               |                                 | 7.77 m                            |                                              | <sup>6</sup> Gln-2,3                                         |                                                                  |
| <sup>7</sup> Aib | 1                               | 176.0 <sup>e</sup> s              |                                              | <sup>8</sup> Aib-NH, <sup>7</sup> Aib-NH,3,4                 |                                                                  |
|                  | 2                               | 55.9 <sup>f</sup> s               |                                              | <sup>7</sup> Aib-NH,3,4                                      |                                                                  |
|                  | 3                               | 26.2 q                            | 1.45 <sup>j</sup> s                          | <sup>7</sup> Aib-NH,4                                        | <sup>7</sup> Aib-NH                                              |
|                  | 4                               | 22.8 <sup>g</sup> q               | 1.35 <sup>i</sup> s                          | <sup>7</sup> Aib-3                                           | <sup>7</sup> Aib-NH                                              |
|                  | NH                              |                                   | 7.86 s                                       |                                                              | <sup>6</sup> Gln-2,3, <sup>7</sup> Aib-3,4, <sup>8</sup> Aib-NH  |
| <sup>8</sup> Aib | 1                               | 175.6 s                           |                                              | <sup>9</sup> Aib-NH, <sup>8</sup> Aib-3,4                    |                                                                  |
|                  | 2                               | 56.0 <sup>f</sup> s               |                                              | <sup>8</sup> Aib-NH,3,4                                      |                                                                  |
|                  | 3                               | 26.6 <sup>h</sup> q               | 1.43 <sup>j</sup> s                          | <sup>8</sup> Aib-NH,4                                        | <sup>8</sup> Aib-NH                                              |
|                  | 4                               | 22.8 <sup>g</sup> q               | 1.35 <sup>i</sup> s                          | <sup>8</sup> Aib-3                                           | <sup>8</sup> Aib-NH                                              |
|                  | NH                              |                                   | 7.59 s                                       |                                                              | <sup>8</sup> Aib-3,4, <sup>7</sup> Aib-NH                        |

Table S7. Cont.

|                   |    |          |              |                                                 |                                                                     |
|-------------------|----|----------|--------------|-------------------------------------------------|---------------------------------------------------------------------|
| <sup>9</sup> Aib  | 1  | 176.4 s  |              | <sup>10</sup> Ser-NH, <sup>9</sup> Aib-3,4,NH   |                                                                     |
|                   | 2  | 56.1 f s |              | <sup>9</sup> Aib-NH,3,4                         |                                                                     |
|                   | 3  | 26.5 h q | 1.48 s       | <sup>9</sup> Aib-4                              | <sup>9</sup> Aib-NH                                                 |
|                   | 4  | 22.9 g q | 1.43 s       | <sup>9</sup> Aib-NH,3                           | <sup>9</sup> Aib-NH                                                 |
|                   | NH |          | 7.79 s       |                                                 | <sup>9</sup> Aib-3,4                                                |
| <sup>10</sup> Ser | 1  | 170.6 s  |              | <sup>11</sup> Leu-NH, <sup>10</sup> Ser-2,3a    | -                                                                   |
|                   | 2  | 58.9 d   | 4.03 m       | <sup>10</sup> Ser-NH                            | <sup>10</sup> Ser-NH,3a,3b, <sup>11</sup> Leu-NH                    |
|                   | 3a | 61.2 t   | 3.75 m       | <sup>10</sup> Ser-NH,2                          | <sup>10</sup> Ser-NH,2                                              |
|                   | 3b |          | 3.79 m       |                                                 | <sup>10</sup> Ser-NH,2                                              |
|                   | NH |          | 7.74 m       |                                                 | <sup>10</sup> Ser-2,3a,3b                                           |
| <sup>11</sup> Leu | 1  | 173.7 s  | -            | <sup>12</sup> Aib-NH, <sup>11</sup> Leu-2       |                                                                     |
|                   | 2  | 51.6 d   | 4.27 m       | <sup>11</sup> Leu-NH,4                          | <sup>11</sup> Leu-NH,5,3a,3b, <sup>13</sup> Pro-5a                  |
|                   | 3a | 39.2 t   | 1.56 m       | <sup>11</sup> Leu-2,5,6                         | <sup>11</sup> Leu-2,5,6,3b                                          |
|                   | 3b |          | 1.70 m       |                                                 | <sup>11</sup> Leu-NH,2,3a,6                                         |
|                   | 4  | 23.9 d   | 1.73 m       | <sup>11</sup> Leu-5,6                           | <sup>11</sup> Leu-NH,5                                              |
|                   | 5  | 20.5 q   | 0.76 d       | <sup>11</sup> Leu-6,3b                          | <sup>11</sup> Leu-2,3a,4                                            |
|                   | 6  | 23.0 q   | 0.82 d       | <sup>11</sup> Leu-5,3b                          | <sup>11</sup> Leu-3a,3b                                             |
| NH                |    | 7.59 d   |              | <sup>10</sup> Ser-2, <sup>11</sup> Leu-2,3b,4   |                                                                     |
| <sup>12</sup> Aib | 1  | 173.0 s  |              | <sup>12</sup> Aib-NH,3,4                        |                                                                     |
|                   | 2  | 56.3 f s |              | <sup>12</sup> Aib-NH,3,4                        |                                                                     |
|                   | 3  | 25.8 q   | 1.37 s       | <sup>12</sup> Aib-3                             | <sup>12</sup> Aib-NH                                                |
|                   | 4  | 23.1 q   | 1.49 s       | <sup>12</sup> Aib-NH,4                          | <sup>12</sup> Aib-NH, <sup>13</sup> Pro-5b                          |
|                   | NH |          | 7.92 s       |                                                 | <sup>12</sup> Aib-3,4                                               |
| <sup>13</sup> Pro | 1  | 173.3 s  | -            | <sup>14</sup> Leu-NH, <sup>13</sup> Pro-2,3a    | -                                                                   |
|                   | 2  | 63.0 d   | 4.21 t (8.0) | <sup>13</sup> Pro-3a,4,5b                       | <sup>14</sup> Leu-5, <sup>13</sup> Pro-4,3b                         |
|                   | 3a | 28.7 t   | 1.60 m       | <sup>13</sup> Pro-2,5b,4                        | <sup>13</sup> Pro-3b, 5a                                            |
|                   | 3b |          | 2.24 m       |                                                 | <sup>13</sup> Pro-3a,2, 4                                           |
|                   | 4  | 26.1 t   | 1.86 m       | <sup>13</sup> Pro-2,5b,5a,3a                    | <sup>13</sup> Pro-2,3b,5a,5b                                        |
|                   | 5a | 48.7 t   | 3.45 m       | <sup>13</sup> Pro-3b                            | <sup>13</sup> Pro-2,3a,4, <sup>11</sup> Leu-2, <sup>14</sup> Leu-NH |
|                   | 5b |          | 3.70 m       |                                                 | <sup>13</sup> Pro-4, <sup>12</sup> Aib-3                            |
| <sup>14</sup> Leu | 1  | 173.8 s  | -            | <sup>15</sup> Aib-NH, <sup>14</sup> Leu-2       | -                                                                   |
|                   | 2  | 53.6 d   | 3.90 m       | <sup>14</sup> Leu-NH                            | <sup>14</sup> Leu-4,3a,3b,5,6,NH, <sup>15</sup> Aib-NH              |
|                   | 3a | 38.7 t   | 1.52 m       | <sup>14</sup> Leu-4,5,6                         | <sup>14</sup> Leu-2,3b,5,6                                          |
|                   | 3b |          | 1.78 m       |                                                 | <sup>14</sup> Leu-2,3a,5,6,NH,4                                     |
|                   | 4  | 24.8 d   | 1.68 m       | <sup>14</sup> Leu-5,6                           | <sup>14</sup> Leu-2,5,6,NH,3b                                       |
|                   | 5  | 23.0 q   | 0.92 d (6.0) | <sup>14</sup> Leu-6,4,3a                        | <sup>14</sup> Leu-2,4,3a,3b, <sup>13</sup> Pro-2                    |
|                   | 6  | 20.9 q   | 0.82 d       | <sup>14</sup> Leu-5,4                           | <sup>14</sup> Leu-2,3a,3b,4                                         |
| NH                |    | 7.72 m   |              | <sup>14</sup> Leu-2, 3b,4, <sup>13</sup> Pro-5a |                                                                     |
| <sup>15</sup> Aib | 1  | 175.3 s  |              | <sup>16</sup> Ile-NH, <sup>15</sup> Aib-NH,3,4  |                                                                     |
|                   | 2  | 56.2 f s |              | <sup>15</sup> Aib-NH,3,4                        |                                                                     |
|                   | 3  | 26.1 h q | 1.42 j s     | <sup>15</sup> Aib-NH,4                          | <sup>15</sup> Aib-NH                                                |
|                   | 4  | 23.4 g q | 1.36 i s     | <sup>15</sup> Aib-3                             | <sup>15</sup> Aib-NH                                                |
|                   | NH |          | 7.63 s       |                                                 | <sup>15</sup> Aib-3,4, <sup>16</sup> Ile-NH,2, <sup>14</sup> Leu-2  |

Table S7. Cont.

|                     |                                              |          |                                  |                                                                       |                                                                                                                                       |
|---------------------|----------------------------------------------|----------|----------------------------------|-----------------------------------------------------------------------|---------------------------------------------------------------------------------------------------------------------------------------|
| <sup>16</sup> Ile   | 1                                            | 171.9 s  | -                                | <sup>17</sup> Glu-NH, <sup>16</sup> Ile-2                             | -                                                                                                                                     |
|                     | 2                                            | 58.9 d   | 3.93 m                           | <sup>16</sup> Ile-NH, <sup>16</sup> Ile-6,4b,3                        | <sup>15</sup> Aib-NH, <sup>16</sup> Ile-NH,6,4b,3,<br><sup>17</sup> Glu-NH                                                            |
|                     | 3                                            | 35.6 d   | 1.88 m                           | <sup>16</sup> Ile-2,4a,4b,5,6,NH                                      | <sup>16</sup> Ile-NH,2,5,6                                                                                                            |
|                     | 4a                                           | 25.0 t   | 1.20 m                           | <sup>16</sup> Ile-2,5,6                                               | <sup>16</sup> Ile-NH,4b                                                                                                               |
|                     | 4b                                           |          | 1.47 m                           |                                                                       | <sup>16</sup> Ile-NH,2,4a,5                                                                                                           |
|                     | 5                                            | 11.5 q   | 0.82 t                           | <sup>16</sup> Ile-4a,4b                                               | <sup>16</sup> Ile-4b,3                                                                                                                |
|                     | 6                                            | 15.7 q   | 0.86 d                           | <sup>16</sup> Ile-4a,4b,2                                             | <sup>16</sup> Ile-2,3                                                                                                                 |
|                     | NH                                           |          | 6.94 d                           |                                                                       | <sup>16</sup> Ile-2,3,4a,4b, <sup>15</sup> Aib-NH                                                                                     |
| <sup>17</sup> Glu   | 1                                            | 171.1 s  |                                  | <sup>18</sup> Gln-NH, <sup>17</sup> Glu-2,3a,3b                       |                                                                                                                                       |
|                     | 2                                            | 53.1 d   | 4.06 m                           | <sup>17</sup> Glu-NH,4a,4b,3b                                         | <sup>18</sup> Gln-NH, <sup>17</sup> Glu-NH,3a,3b,4a                                                                                   |
|                     | 3a                                           | 26.5 t   | 1.87 m                           | <sup>17</sup> Glu-2,4a,4b                                             | <sup>17</sup> Glu-NH,2,4b                                                                                                             |
|                     | 3b                                           |          | 1.97 m                           |                                                                       | <sup>17</sup> Glu-NH,2,4a                                                                                                             |
|                     | 4a                                           | 30.1 t   | 2.37 m                           | <sup>17</sup> Glu-2                                                   | <sup>17</sup> Glu-NH,2,3b                                                                                                             |
|                     | 4b                                           |          | 2.44 m                           |                                                                       | <sup>17</sup> Glu-NH,3a                                                                                                               |
|                     | 5                                            | 172.9 s  |                                  | <sup>17</sup> Glu-4a,4b,OCH <sub>3</sub>                              |                                                                                                                                       |
|                     | NH<br>OCH <sub>3</sub>                       | 51.4 q   | 7.68 m<br>3.54 s                 |                                                                       | <sup>17</sup> Glu-2,3a, <sup>16</sup> Ile-2                                                                                           |
| <sup>18</sup> Gln   | 1                                            | 170.8 s  |                                  | <sup>19</sup> Pheol-NH,<br><sup>18</sup> Gln-2,3a,3b                  |                                                                                                                                       |
|                     | 2                                            | 53.0 d   | 4.06 m                           | <sup>18</sup> Gln-NH,3a,3b,4a,4b                                      | <sup>19</sup> Pheol-NH, <sup>18</sup> Gln-NH,3a,3b,4b                                                                                 |
|                     | 3a                                           | 27.7 t   | 1.83 m                           | <sup>18</sup> Gln-2,4a,4b,NH                                          | <sup>18</sup> Gln-NH,2,3b,4a                                                                                                          |
|                     | 3b                                           |          | 1.70 m                           |                                                                       | <sup>18</sup> Gln-NH,2,3a,4a                                                                                                          |
|                     | 4a                                           | 31.6 g t | 2.05 m                           | <sup>18</sup> Gln-NH <sub>2</sub> a,2,3a,3b                           | <sup>18</sup> Gln-3a,3b                                                                                                               |
|                     | 4b                                           |          | 1.97 m                           |                                                                       | <sup>18</sup> Gln-NH,NH <sub>2</sub> b,2                                                                                              |
|                     | 5                                            | 173.6 s  |                                  | <sup>18</sup> Gln-NH <sub>2</sub> a,NH <sub>2</sub> b,3a,3b,<br>4a,4b |                                                                                                                                       |
|                     | NH <sub>2</sub> a<br>NH <sub>2</sub> b<br>NH |          | 6.65 s<br>7.10 s<br>7.48 d (8.0) |                                                                       | <sup>18</sup> Gln-NH <sub>2</sub> b<br><sup>18</sup> Gln-NH <sub>2</sub> a,4b<br><sup>19</sup> Pheol-NH, <sup>18</sup> Gln-2,3a,3b,4b |
| <sup>19</sup> Pheol | 1a                                           | 62.7 t   | 3.28 m                           | <sup>19</sup> Pheol-2,3a,3b                                           | <sup>19</sup> Pheol-NH,2,3a,3b,5                                                                                                      |
|                     | 1b                                           |          | 3.32 m                           |                                                                       | <sup>19</sup> Pheol-NH,2,3a,3b                                                                                                        |
|                     | 2                                            | 52.5 d   | 3.87 m                           | <sup>19</sup> Pheol-1a,1b,3a,3b,NH                                    | <sup>19</sup> Pheol-NH,1a,1b,3a,3b,5                                                                                                  |
|                     | 3a                                           | 36.6 t   | 2.61 dd (13.5, 8.3)              | <sup>19</sup> Pheol-1a,1b,2,5                                         | <sup>19</sup> Pheol-NH,1a,1b,2,5                                                                                                      |
|                     | 3b                                           |          | 2.84 dd (13.6, 5.3)              |                                                                       | <sup>19</sup> Pheol-1a,1b,2,5                                                                                                         |
|                     | 4                                            | 139.2 s  |                                  | <sup>19</sup> Pheol-2,3a,3b,5,7                                       |                                                                                                                                       |
|                     | 5                                            | 129.4 d  | 7.21 m                           | <sup>19</sup> Pheol-3a,3b,5,7                                         | <sup>19</sup> Pheol-1a,2,3a,3b,7                                                                                                      |
|                     | 6                                            | 128.1 d  | 7.19 m                           | <sup>19</sup> Pheol-5,7                                               |                                                                                                                                       |
|                     | 7                                            | 126.0 d  | 7.13 m                           | <sup>19</sup> Pheol-5,6                                               | <sup>19</sup> Pheol-5                                                                                                                 |
|                     | OH<br>NH                                     |          | 7.30 d (8)                       |                                                                       | <sup>18</sup> Gln-NH,2, <sup>19</sup> Pheol-1a,1b,2,3a                                                                                |

<sup>a</sup> Carried out on an AVANCE-500, Bruker instrument; <sup>b</sup> Multiplicity and assignment are from HSQC experiment; <sup>c</sup> Values determined from HMBC experiment; <sup>n</sup>J<sub>CH</sub> = 8 Hz, recycle time 1 s; <sup>d</sup> Selected NOE's from a ROESY experiment; e,f,g,h,i,j These signals may interchange.

Table S8. NMR data for TA1909a <sup>a</sup> (**8**) in DMSO-*d*<sub>6</sub>.

| Position         | $\delta_C$ , mult. | $^b \delta_H$ , mult., <i>J</i> (Hz) | LR C-H correlations <sup>c</sup>                | NOE correlations <sup>d</sup>                                     |
|------------------|--------------------|--------------------------------------|-------------------------------------------------|-------------------------------------------------------------------|
| Ac               | 1                  | 171.1 s                              | Ac-2, <sup>1</sup> Aib-NH                       |                                                                   |
|                  | 2                  | 23.1 q                               | 1.93 s                                          | <sup>1</sup> Aib-NH                                               |
| <sup>1</sup> Aib | 1                  | 175.8 s                              | <sup>2</sup> Ala-NH, <sup>1</sup> Aib-NH,3,4    |                                                                   |
|                  | 2                  | 55.8 <sup>h</sup> s                  | <sup>1</sup> Aib-NH,3,4                         |                                                                   |
|                  | 3                  | 26.3 q                               | 1.36 s                                          | <sup>1</sup> Aib-NH                                               |
|                  | 4                  | 23.7 q                               | 1.33 s                                          | <sup>1</sup> Aib-3                                                |
|                  | NH                 |                                      | 8.56 s                                          | Ac-2, <sup>1</sup> Aib-3,4                                        |
| <sup>2</sup> Ala | 1                  | 174.6 s                              | <sup>3</sup> Ala-NH, <sup>2</sup> Ala-2,3       |                                                                   |
|                  | 2                  | 50.9 d                               | 4.01 m                                          | <sup>2</sup> Ala-NH,3                                             |
|                  | 3                  | 16.9 q                               | 1.31 d                                          | <sup>2</sup> Ala-NH,2                                             |
|                  | NH                 |                                      | 8.25 d (6.0)                                    | <sup>2</sup> Ala-2,3, <sup>3</sup> Ala-NH                         |
| <sup>3</sup> Ala | 1                  | 174.6 s                              | <sup>4</sup> Aib-NH, <sup>3</sup> Ala-2,3       |                                                                   |
|                  | 2                  | 51.1 d                               | 4.01 m                                          | <sup>3</sup> Ala-3                                                |
|                  | 3                  | 16.2 q                               | 1.33 d (7.5)                                    | <sup>2</sup> Ala-NH,2                                             |
|                  | NH                 |                                      | 7.68 d (6.0)                                    | <sup>4</sup> Aib-NH, <sup>3</sup> Ala-2,3, <sup>2</sup> Ala-NH    |
| <sup>4</sup> Aib | 1                  | 175.0 s                              | <sup>5</sup> Iva-NH, <sup>4</sup> Aib-3,NH      |                                                                   |
|                  | 2                  | 56.2 <sup>h</sup> s                  | <sup>4</sup> Aib-NH,3,4                         |                                                                   |
|                  | 3                  | 26.3 q                               | 1.46 s                                          | <sup>4</sup> Aib-NH,4                                             |
|                  | 4                  | 23.3 <sup>e</sup> q                  | 1.35 <sup>f</sup> s                             | <sup>4</sup> Aib-3                                                |
|                  | NH                 |                                      | 7.87 s                                          | <sup>4</sup> Aib-2,3, <sup>3</sup> Ala-NH,2, <sup>5</sup> Iva-NH  |
| <sup>5</sup> Iva | 1                  | 176.2 s                              | <sup>6</sup> Gln-NH, <sup>5</sup> Iva-NH        |                                                                   |
|                  | 2                  | 58.5 s                               | <sup>5</sup> Iva-NH,3a,3b,4,5                   |                                                                   |
|                  | 3a                 | 25.9 t                               | 2.21 m                                          | <sup>5</sup> Iva-4                                                |
|                  | 3b                 |                                      | 1.62 m                                          |                                                                   |
|                  | 4                  | 7.4 q                                | 0.73 t (7.4)                                    |                                                                   |
|                  | 5                  | 22.6 q                               | 1.35 s                                          | <sup>5</sup> Iva-3a                                               |
|                  | NH                 |                                      | 7.47 s                                          | <sup>5</sup> Iva-4,5,3a, <sup>6</sup> Gln-NH, <sup>4</sup> Aib-NH |
| <sup>6</sup> Gln | 1                  | 174.1 s                              | <sup>7</sup> Aib-NH, <sup>6</sup> Gln-2         |                                                                   |
|                  | 2                  | 56.0 <sup>h</sup> d                  | 3.78 m                                          | <sup>7</sup> Aib-NH,4, <sup>6</sup> Gln-NH,3,4a,4b                |
|                  | 3                  | 26.2 t                               | 1.97 m                                          | <sup>6</sup> Gln-2,NH, <sup>7</sup> Aib-NH                        |
|                  | 4a                 | 31.7 t                               | 2.14 m                                          | <sup>6</sup> Gln-NH <sub>2</sub> a, 2,4b,NH                       |
|                  | 4b                 |                                      | 2.23 m                                          | <sup>6</sup> Gln-NH <sub>2</sub> a 2,4a,NH                        |
|                  | 5                  | 173.6 <sup>e</sup> s                 |                                                 | <sup>6</sup> Gln-3,4a,4b,NH <sub>2</sub> a                        |
|                  | NH <sub>2</sub> a  |                                      | 7.16 s                                          | <sup>6</sup> Gln-NH <sub>2</sub> b,4a,4b                          |
|                  | NH <sub>2</sub> b  |                                      | 6.76 s                                          | <sup>6</sup> Gln-NH <sub>2</sub> a                                |
| NH               |                    | 7.73 m                               | <sup>6</sup> Gln-2,3,4a,4b, <sup>5</sup> Iva-NH |                                                                   |
| <sup>7</sup> Aib | 1                  | 176.0 s                              | <sup>8</sup> Aib-NH, <sup>7</sup> Aib-3,4       |                                                                   |
|                  | 2                  | 56.2 <sup>h</sup> s                  | <sup>7</sup> Aib-NH,3,4                         |                                                                   |
|                  | 3                  | 26.2 <sup>g</sup> q                  | 1.43 <sup>j</sup> s                             | <sup>7</sup> Aib-NH,4                                             |
|                  | 4                  | 22.9 <sup>e</sup> q                  | 1.36 <sup>f</sup> s                             | <sup>7</sup> Aib-3                                                |
|                  | NH                 |                                      | 7.90 s                                          | <sup>7</sup> Aib-NH, <sup>6</sup> Gln-2                           |
| <sup>8</sup> Aib | 1                  | 176.4 s                              | <sup>9</sup> Ala-NH, <sup>8</sup> Aib-3,4,NH    |                                                                   |
|                  | 2                  | 56.1 <sup>h</sup> s                  | <sup>8</sup> Aib-NH,3,4                         |                                                                   |
|                  | 3                  | 26.4 <sup>g</sup> q                  | 1.43 <sup>j</sup> s                             | <sup>8</sup> Aib-4                                                |
|                  | 4                  | 23.2 <sup>e</sup> q                  | 1.39 <sup>f</sup> s                             | <sup>8</sup> Aib-3                                                |
|                  | NH                 |                                      | 7.55 s                                          | <sup>8</sup> Aib-3,4, <sup>7</sup> Aib-NH, <sup>9</sup> Ala-NH    |



Table S8. Cont.

|                   |    |                     |                     |                                                  |                                                                               |
|-------------------|----|---------------------|---------------------|--------------------------------------------------|-------------------------------------------------------------------------------|
| <sup>9</sup> Ala  | 1  | 174.6 s             |                     | <sup>10</sup> Ser-NH, <sup>9</sup> Ala-2,3       |                                                                               |
|                   | 2  | 51.7 d              | 3.96 m              | <sup>9</sup> Ala-3                               | <sup>9</sup> Ala-NH                                                           |
|                   | 3  | 16.5 q              | 1.40 d              | <sup>9</sup> Ala-NH,3                            | <sup>9</sup> Ala-NH                                                           |
|                   | NH |                     | 7.72 s              |                                                  | <sup>9</sup> Ala-2,3, Aib-NH                                                  |
| <sup>10</sup> Ser | 1  | 170.6 s             |                     | <sup>10</sup> Ser-2,3a,3b, <sup>11</sup> Leu-NH  |                                                                               |
|                   | 2  | 58.1 d              | 4.11 m              |                                                  | <sup>10</sup> Ser-NH,OH, <sup>11</sup> Leu-NH                                 |
|                   | 3a | 61.0 <sup>i</sup> t | 3.72 m              | <sup>10</sup> Ser-2                              | <sup>10</sup> Ser-NH,OH                                                       |
|                   | 3b |                     | 3.76                |                                                  | <sup>10</sup> Ser-NH,OH                                                       |
|                   | OH |                     | 4.87 t (6.2)        |                                                  | <sup>10</sup> Ser-NH,2,3a,3b                                                  |
|                   | NH |                     | 7.76 d              |                                                  | <sup>10</sup> Ser-2,3b,OH, <sup>11</sup> Leu-NH                               |
| <sup>11</sup> Leu | 1  | 173.3 s             |                     | <sup>12</sup> Aib-NH, <sup>11</sup> Leu-2        |                                                                               |
|                   | 2  | 51.4 d              | 4.28 m              |                                                  | <sup>12</sup> Aib-NH, <sup>11</sup> Leu-NH,5,3a,3b,4,<br><sup>13</sup> Pro-5a |
|                   | 3a | 39.8 t              | 1.55 m              | <sup>11</sup> Leu-5,6                            | <sup>11</sup> Leu-2,6,4                                                       |
|                   | 3b |                     | 1.67 m              |                                                  | <sup>11</sup> Leu-NH,2,6                                                      |
|                   | 4  | 24.0 d              | 1.69 m              | <sup>11</sup> Leu-5,6                            | <sup>11</sup> Leu-NH,2,3a                                                     |
|                   | 5  | 21.0 q              | 0.78 d (6.8)        | <sup>11</sup> Leu-6                              | <sup>11</sup> Leu-2                                                           |
|                   | 6  | 22.9 q              | 0.84 m              | <sup>11</sup> Leu-5,3a                           | <sup>11</sup> Leu-3a,3b,2                                                     |
|                   | NH |                     | 7.44 m              |                                                  | <sup>10</sup> Ser-2,NH, <sup>11</sup> Leu-2,3b,4,<br><sup>12</sup> Aib-NH     |
| <sup>12</sup> Aib | 1  | 172.7 s             |                     | <sup>12</sup> Aib-NH,3,4                         |                                                                               |
|                   | 2  | 56.1 <sup>h</sup> s |                     | <sup>12</sup> Aib-3,4                            |                                                                               |
|                   | 3  | 25.5 q              | 1.40 s              |                                                  | <sup>12</sup> Aib-NH                                                          |
|                   | 4  | 22.9 q              | 1.49 s              |                                                  | <sup>12</sup> Aib-NH, <sup>13</sup> Pro-5b,2                                  |
|                   | NH |                     | 7.93 s              |                                                  | <sup>13</sup> Pro-5b, <sup>11</sup> Leu-2,NH, <sup>12</sup> Aib-3,4           |
| <sup>13</sup> Pro | 1  | 173.8 s             |                     | <sup>14</sup> Val-NH, <sup>13</sup> Pro-2,3a     |                                                                               |
|                   | 2  | 63.0 d              | 4.24 t (7.6)        | <sup>13</sup> Pro-4                              | <sup>14</sup> Val-NH, <sup>13</sup> Pro-4, 3b                                 |
|                   | 3a | 29.1 t              | 1.65 m              | <sup>13</sup> Pro-2,4                            | <sup>13</sup> Pro-3b                                                          |
|                   | 3b |                     | 2.22 m              |                                                  | <sup>13</sup> Pro-3a,2,5b                                                     |
|                   | 4  | 26.0 t              | 1.86 m              | <sup>13</sup> Pro-5b                             | <sup>13</sup> Pro-2,5a,5b                                                     |
|                   | 5a | 48.6 t              | 3.48 m              |                                                  | <sup>13</sup> Pro-4,5b, <sup>11</sup> Leu-2, <sup>14</sup> Val-NH             |
|                   | 5b |                     | 3.70 m              |                                                  | <sup>13</sup> Pro-3b,4,5a, <sup>12</sup> Aib-NH,3                             |
| <sup>14</sup> Val | 1  | 172.7 s             |                     | <sup>15</sup> Aib-NH, <sup>14</sup> Val-2        |                                                                               |
|                   | 2  | 61.1 <sup>i</sup> d | 3.77 m              | <sup>14</sup> Val-3,4,5                          | <sup>14</sup> Val-4,5,3,NH, <sup>15</sup> Aib-NH                              |
|                   | 3  | 28.8 d              | 2.21 m              | <sup>14</sup> Val-2,4,5                          | <sup>14</sup> Val-2,4,5,NH                                                    |
|                   | 4  | 19.2 q              | 0.94 d (6.4)        | <sup>14</sup> Val-5,2,3                          | <sup>14</sup> Val-NH,2,3                                                      |
|                   | 5  | 19.2 q              | 0.88 d              | <sup>14</sup> Val-4,2,3                          | <sup>14</sup> Val-2,3                                                         |
|                   | NH |                     | 7.60 d (7.2)        |                                                  | <sup>14</sup> Val-2,3,4, <sup>13</sup> Pro-2,5a,<br><sup>15</sup> Aib-NH      |
| <sup>15</sup> Aib | 1  | 175.7 s             |                     | <sup>16</sup> Ile-NH,2, <sup>15</sup> Aib-NH,3,4 |                                                                               |
|                   | 2  | 56.1 <sup>h</sup> s |                     | <sup>15</sup> Aib-3,4                            |                                                                               |
|                   | 3  | 26.3 <sup>g</sup> q | 1.45 <sup>j</sup> s | <sup>15</sup> Aib-4                              | <sup>15</sup> Aib-NH                                                          |
|                   | 4  | 23.2 <sup>e</sup> q | 1.39 <sup>f</sup> s | <sup>15</sup> Aib-3                              | <sup>15</sup> Aib-NH                                                          |
|                   | NH |                     | 7.43 s              |                                                  | <sup>15</sup> Aib-3,4, <sup>14</sup> Val-NH,2                                 |

Table S8. Cont.

|                     |                   |           |                     |                                                    |                                                                           |
|---------------------|-------------------|-----------|---------------------|----------------------------------------------------|---------------------------------------------------------------------------|
| <sup>16</sup> Ile   | 1                 | 172.4 s   |                     | <sup>17</sup> Gln-NH, <sup>16</sup> Ile-2          |                                                                           |
|                     | 2                 | 59.6 d    | 3.87 m              | <sup>16</sup> Ile-6                                | <sup>16</sup> Ile-NH,6,4b,3, <sup>17</sup> Gln-NH                         |
|                     | 3                 | 35.5 d    | 1.88 m              | <sup>16</sup> Ile-2,4a,5,6                         | <sup>16</sup> Ile-NH,2,6                                                  |
|                     | 4a                | 25.4 t    | 1.20 m              | <sup>16</sup> Ile-2,5,6                            | <sup>16</sup> Ile-4b,NH                                                   |
|                     | 4b                |           | 1.50 m              |                                                    | <sup>16</sup> Ile-NH,2,4a,5                                               |
|                     | 5                 | 11.4 q    | 0.81 t              | <sup>16</sup> Ile-4a                               | <sup>16</sup> Ile-4b                                                      |
|                     | 6                 | 15.7 q    | 0.86 d              | <sup>16</sup> Ile-2                                | <sup>16</sup> Ile-NH,2,3                                                  |
|                     | NH                |           | 7.22 m              |                                                    | <sup>16</sup> Ile-2,3,4a,4b,6                                             |
| <sup>17</sup> Gln   | 1                 | 171.8 s   |                     | <sup>18</sup> Gln-NH, <sup>17</sup> Gln-2          |                                                                           |
|                     | 2                 | 54.3 d    | 3.97 m              | <sup>17</sup> Gln-4a,4b                            | <sup>17</sup> Gln-NH,3,4a,4b                                              |
|                     | 3                 | 26.8 t    | 1.90 m              | <sup>17</sup> Gln-2,4a,4b                          | <sup>17</sup> Gln-NH,2                                                    |
|                     | 4a                | 31.7 t    | 2.13 m              | <sup>17</sup> Gln-NH <sub>2</sub> a                | <sup>17</sup> Gln-NH,2,NH <sub>2</sub> b                                  |
|                     | 4b                |           | 2.23 m              |                                                    | <sup>17</sup> Gln-NH,2,NH <sub>2</sub> b                                  |
|                     | 5                 | 173.7 e s |                     | <sup>17</sup> Gln-4a,4b,NH <sub>2</sub> b          |                                                                           |
|                     | NH <sub>2</sub> a |           | 6.72 s              |                                                    | <sup>17</sup> Gln-NH <sub>2</sub> b                                       |
|                     | NH <sub>2</sub> b |           | 7.13 s              |                                                    | <sup>17</sup> Gln-NH <sub>2</sub> a,4a,4b                                 |
|                     | NH                |           | 7.69 d (5.6)        |                                                    | <sup>17</sup> Gln-2,3,4a,4b, <sup>16</sup> Ile-2,<br><sup>18</sup> Gln-NH |
| <sup>18</sup> Gln   | 1                 | 171.0 s   |                     | <sup>19</sup> Pheol-NH, <sup>18</sup> Gln-2        |                                                                           |
|                     | 2                 | 53.4 d    | 4.03 m              | <sup>18</sup> Gln-NH,4a,4b                         | <sup>19</sup> Pheol-NH, <sup>18</sup> Gln-NH,3a,3b,4b                     |
|                     | 3a                | 27.4 t    | 1.85 m              | <sup>18</sup> Gln-4a,4b                            | <sup>18</sup> Gln-NH,2,3b,4a                                              |
|                     | 3b                |           | 1.72 m              |                                                    | <sup>18</sup> Gln-2,3a,4a                                                 |
|                     | 4a                | 31.5 s    | 2.05 m              | <sup>18</sup> Gln-NH <sub>2</sub> a                | <sup>18</sup> Gln-3a,3b,NH                                                |
|                     | 4b                |           | 1.98 m              |                                                    | <sup>18</sup> Gln-NH,NH <sub>2</sub> b,2                                  |
|                     | 5                 | 173.8 e s |                     | <sup>18</sup> Gln-NH <sub>2</sub> b,3b,4a,4b       |                                                                           |
|                     | NH <sub>2</sub> a |           | 6.63 s              |                                                    | <sup>18</sup> Gln-NH <sub>2</sub> b                                       |
|                     | NH <sub>2</sub> b |           | 7.07 s              |                                                    | <sup>18</sup> Gln-NH <sub>2</sub> a,4b                                    |
| NH                  |                   | 7.46 d    |                     | <sup>18</sup> Gln-2,3b,4a,4b, <sup>17</sup> Gln-NH |                                                                           |
| <sup>19</sup> Pheol | 1a                | 62.9 t    | 3.30 m              | <sup>19</sup> Pheol-3a,3b                          | <sup>19</sup> Pheol-OH                                                    |
|                     | 1b                |           | 3.33 m              |                                                    | <sup>19</sup> Pheol-OH                                                    |
|                     | 2                 | 52.6 d    | 3.86 m              | <sup>19</sup> Pheol-1a,1b,OH                       | <sup>19</sup> Pheol-NH,3a,3b,5,OH                                         |
|                     | 3a                | 36.7 t    | 2.63 dd (13.5, 8.2) | <sup>19</sup> Pheol-1a,1b,5                        | <sup>19</sup> Pheol-NH,2                                                  |
|                     | 3b                |           | 2.84 dd (13.5, 5.2) |                                                    | <sup>19</sup> Pheol-2,5                                                   |
|                     | 4                 | 139.3 s   |                     | <sup>19</sup> Pheol-2,3a,3b,6                      |                                                                           |
|                     | 5                 | 129.4 d   | 7.22 m              | <sup>19</sup> Pheol-3a,3b,5,7                      | <sup>19</sup> Pheol-2,3b                                                  |
|                     | 6                 | 128.1 d   | 7.20 m              | <sup>19</sup> Pheol-6                              |                                                                           |
|                     | 7                 | 126.0 d   | 7.12 m              | <sup>19</sup> Pheol-5                              |                                                                           |
|                     | OH                |           | 4.69 t (6.2)        |                                                    | <sup>19</sup> Pheol-1a,1b,2,NH                                            |
|                     | NH                |           | 7.18 m              |                                                    | <sup>18</sup> Gln-2, <sup>19</sup> Pheol-2,3a,OH                          |

<sup>a</sup> Carried out on an AVANCE-400, Bruker instrument; <sup>b</sup> Multiplicity and assignment are from HSQC experiment; <sup>c</sup> Values determined from HMBC experiment; <sup>n</sup>J<sub>CH</sub>=8 Hz, recycle time 1 s; <sup>d</sup> Selected NOE's from a ROESY experiment; e,f,g,h,i,j These signals may interchange.

Table S9. NMR data for TA.VIb <sup>a</sup> (9) in DMSO-*d*<sub>6</sub>.

| Position         | $\delta_C$ , mult. <sup>b</sup> | $\delta_H$ , mult., <i>J</i> (Hz) | LR C-H correlations <sup>c</sup>             | NOE correlations <sup>d</sup>                                |                                                                |
|------------------|---------------------------------|-----------------------------------|----------------------------------------------|--------------------------------------------------------------|----------------------------------------------------------------|
| Ac               | 1                               | 171.2 s                           | Ac-2, <sup>1</sup> Aib-NH                    |                                                              |                                                                |
|                  | 2                               | 23.0 q                            | 1.93 s                                       | <sup>1</sup> Aib-NH                                          |                                                                |
| <sup>1</sup> Aib | 1                               | 175.9 s                           | <sup>2</sup> Ala-NH, <sup>1</sup> Aib-NH,3,4 |                                                              |                                                                |
|                  | 2                               | 55.8 s                            | <sup>1</sup> Aib-NH,3,4                      |                                                              |                                                                |
|                  | 3                               | 26.1 q                            | 1.36 s                                       | <sup>1</sup> Aib-NH                                          | <sup>1</sup> Aib-NH                                            |
|                  | 4                               | 24.2 q                            | 1.33 s                                       | <sup>1</sup> Aib-3                                           | <sup>1</sup> Aib-NH                                            |
|                  | NH                              |                                   | 8.55 s                                       |                                                              | Ac-2, <sup>1</sup> Aib-3,4                                     |
| <sup>2</sup> Ala | 1                               | 174.6 s                           | <sup>3</sup> Ala-NH, <sup>2</sup> Ala-2,3    |                                                              |                                                                |
|                  | 2                               | 51.0 d                            | 3.99 m                                       | <sup>2</sup> Ala-NH,3                                        | <sup>2</sup> Ala-NH,3                                          |
|                  | 3                               | 16.9 q                            | 1.31 d                                       | <sup>2</sup> Ala-NH,2                                        | <sup>2</sup> Ala-NH,2                                          |
|                  | NH                              |                                   | 8.25 d (5.1)                                 |                                                              | <sup>2</sup> Ala-2,3, <sup>3</sup> Ala-NH                      |
| <sup>3</sup> Ala | 1                               | 174.7 s                           | <sup>4</sup> Aib-NH, <sup>3</sup> Ala-2,3    |                                                              |                                                                |
|                  | 2                               | 51.2 d                            | 4.01 m                                       | <sup>3</sup> Ala-NH,3                                        | <sup>3</sup> Ala-NH, 3, <sup>4</sup> Aib-NH                    |
|                  | 3                               | 16.2 q                            | 1.33 d (7.5)                                 | <sup>2</sup> Ala-NH,2                                        | <sup>3</sup> Ala-NH,2                                          |
|                  | NH                              |                                   | 7.70 d (6.0)                                 |                                                              | <sup>4</sup> Aib-NH, <sup>3</sup> Ala-2,3, <sup>2</sup> Ala-NH |
| <sup>4</sup> Aib | 1                               | 175.1 s                           | <sup>5</sup> Aib-NH, <sup>4</sup> Aib-3      |                                                              |                                                                |
|                  | 2                               | 56.0 j s                          |                                              | <sup>4</sup> Aib-NH,3,4                                      |                                                                |
|                  | 3                               | 26.2 h q                          | 1.43 f s                                     | <sup>4</sup> Aib-NH,4                                        | <sup>4</sup> Aib-NH                                            |
|                  | 4                               | 23.4 i q                          | 1.36 k s                                     | <sup>4</sup> Aib-NH,3                                        | <sup>4</sup> Aib-NH                                            |
|                  | NH                              |                                   | 7.85 s                                       |                                                              | <sup>4</sup> Aib-2,3, <sup>3</sup> Ala-NH,2                    |
| <sup>5</sup> Aib | 1                               | 176.0 e s                         | <sup>6</sup> Gln-NH, <sup>5</sup> Aib-3,4,NH |                                                              |                                                                |
|                  | 2                               | 55.9 j s                          |                                              | <sup>5</sup> Aib-NH,3,4                                      |                                                                |
|                  | 3                               | 26.6 h q                          | 1.44 s                                       | <sup>5</sup> Aib-NH,4                                        | <sup>5</sup> Aib-NH                                            |
|                  | 4                               | 22.7 q                            | 1.39 s                                       | <sup>5</sup> Aib-3                                           | <sup>5</sup> Aib-NH                                            |
|                  | NH                              |                                   | 7.54 s                                       |                                                              | <sup>5</sup> Aib-3,4                                           |
| <sup>6</sup> Gln | 1                               | 173.9 s                           | <sup>7</sup> Aib-NH, <sup>6</sup> Gln-2      |                                                              |                                                                |
|                  | 2                               | 56.0 d                            | 3.78 m                                       | <sup>6</sup> Gln-NH,3,4a,4b                                  | <sup>7</sup> Aib-NH,<br><sup>6</sup> Gln-NH,3,4a,4b            |
|                  | 3                               | 26.2 t                            | 1.98 m                                       | <sup>6</sup> Gln-2,4a,4b,NH                                  | <sup>6</sup> Gln-2,4a,4b,NH,<br><sup>7</sup> Aib-NH            |
|                  | 4a                              | 31.6 g t                          | 2.14 m                                       | <sup>6</sup> Gln-2,3,NH <sub>2</sub> b                       | <sup>6</sup> Gln-NH <sub>2</sub> a,2,3,4b,NH                   |
|                  | 4b                              |                                   | 2.23 m                                       |                                                              | <sup>6</sup> Gln-NH <sub>2</sub> a,2,3,4a                      |
|                  | 5                               | 173.7 s                           |                                              | <sup>6</sup> Gln-3,4a,4b,NH <sub>2</sub> a,NH <sub>2</sub> b |                                                                |
|                  | NH <sub>2</sub> a               |                                   | 7.14 s                                       |                                                              | <sup>6</sup> Gln-4a,NH <sub>2</sub> b,4a,4b                    |
|                  | NH <sub>2</sub> b               |                                   | 6.74 s                                       |                                                              | <sup>6</sup> Gln-NH <sub>2</sub> a                             |
| NH               |                                 | 7.75 m                            |                                              | <sup>6</sup> Gln-2,3,4a                                      |                                                                |
| <sup>7</sup> Aib | 1                               | 176.1 e s                         | <sup>8</sup> Aib-NH, <sup>7</sup> Aib-NH,3,4 |                                                              |                                                                |
|                  | 2                               | 56.1 j s                          |                                              | <sup>7</sup> Aib-NH,3,4                                      |                                                                |
|                  | 3                               | 26.1 h q                          | 1.42 f s                                     | <sup>7</sup> Aib-NH,4                                        | <sup>7</sup> Aib-NH                                            |
|                  | 4                               | 23.0 i q                          | 1.38 k s                                     | <sup>7</sup> Aib-NH                                          | <sup>7</sup> Aib-NH                                            |
|                  | NH                              |                                   | 7.85 s                                       |                                                              | <sup>6</sup> Gln-2,3, <sup>7</sup> Aib-3,4                     |

Table S9. Cont.

|                   |    |          |              |                                              |                                                        |
|-------------------|----|----------|--------------|----------------------------------------------|--------------------------------------------------------|
| <sup>8</sup> Aib  | 1  | 175.7 s  |              | <sup>9</sup> Aib-NH, <sup>8</sup> Aib-3,4,NH |                                                        |
|                   | 2  | 56.1 j s |              | <sup>8</sup> Aib-NH,3,4                      |                                                        |
|                   | 3  | 26.6 h q | 1.43 f s     | <sup>8</sup> Aib-NH,4                        | <sup>8</sup> Aib-NH                                    |
|                   | 4  | 23.2 i q | 1.35 k s     | <sup>8</sup> Aib-3                           | <sup>8</sup> Aib-NH                                    |
|                   | NH |          | 7.58 s       |                                              | <sup>8</sup> Aib-3,4                                   |
| <sup>9</sup> Aib  | 1  | 176.5 s  |              | <sup>10</sup> Ser-NH, <sup>9</sup> Aib-3,4   |                                                        |
|                   | 2  | 56.2 j s |              | <sup>9</sup> Aib-NH,3,4                      |                                                        |
|                   | 3  | 26.7 h q | 1.47 s       | <sup>9</sup> Aib-NH,4                        | <sup>9</sup> Aib-NH                                    |
|                   | 4  | 23.3 i q | 1.44 s       | <sup>9</sup> Aib-3                           | <sup>9</sup> Aib-NH                                    |
|                   | NH |          | 7.78 s       |                                              | <sup>9</sup> Aib-3,4                                   |
| <sup>10</sup> Ser | 1  | 170.7 s  |              | <sup>11</sup> Leu-NH, <sup>10</sup> Ser-2,3a |                                                        |
|                   | 2  | 59.0 d   | 4.03 m       | <sup>10</sup> Ser-NH                         | <sup>10</sup> Ser-NH,3a,3b                             |
|                   | 3a | 61.2 t   | 3.74 m       | <sup>10</sup> Ser-NH,2                       | <sup>10</sup> Ser-NH,2                                 |
|                   | 3b |          | 3.75 m       |                                              | <sup>10</sup> Ser-NH,2                                 |
|                   | NH |          | 7.76 m       |                                              | <sup>10</sup> Ser-2,3a,3b                              |
| <sup>11</sup> Leu | 1  | 173.6 s  |              | <sup>12</sup> Aib-NH, <sup>11</sup> Leu-2    |                                                        |
|                   | 2  | 51.4 d   | 4.28 m       | <sup>11</sup> Leu-3b                         | <sup>11</sup> Leu-NH,5,3a,3b,4,<br><sup>14</sup> Val-4 |
|                   | 3a | 39.8 t   | 1.54 m       | <sup>11</sup> Leu-2,5,6                      | <sup>11</sup> Leu-2,5                                  |
|                   | 3b |          | 1.70 m       |                                              | <sup>11</sup> Leu-NH,2,5,6                             |
|                   | 4  | 24.2 d   | 1.70 m       | <sup>11</sup> Leu-5,6                        | <sup>11</sup> Leu-NH,2,5,6                             |
|                   | 5  | 20.8 q   | 0.77 d       | <sup>11</sup> Leu-6,4                        | <sup>11</sup> Leu-2,3a,3b                              |
|                   | 6  | 22.9 q   | 0.83 d       | <sup>11</sup> Leu-5,3a                       | <sup>11</sup> Leu-3b                                   |
|                   | NH |          | 7.62 m       |                                              | <sup>11</sup> Leu-2,3b,4, <sup>12</sup> Aib-NH         |
| <sup>12</sup> Aib | 1  | 172.8 s  |              | <sup>12</sup> Aib-NH,3,4                     |                                                        |
|                   | 2  | 56.3 s   |              | <sup>12</sup> Aib-NH,3,4                     |                                                        |
|                   | 3  | 25.5 q   | 1.40 s       | <sup>12</sup> Aib-NH,4                       | <sup>12</sup> Aib-NH, <sup>13</sup> Pro-5b             |
|                   | 4  | 22.9 q   | 1.49 s       | <sup>12</sup> Aib-3                          | <sup>12</sup> Aib-NH                                   |
|                   | NH |          | 7.95 s       |                                              | <sup>12</sup> Aib-3,4, <sup>11</sup> Leu-NH            |
| <sup>13</sup> Pro | 1  | 173.8 s  |              | <sup>13</sup> Pro-2,3a, <sup>14</sup> Val-NH |                                                        |
|                   | 2  | 63.1 d   | 4.25 t (7.8) | <sup>13</sup> Pro-3a,4                       | <sup>13</sup> Pro-4,3a,3b,<br><sup>13</sup> Pro-2,3b,4 |
|                   | 3a | 28.9 t   | 1.67 m       | <sup>13</sup> Pro-2,4,5b                     | <sup>13</sup> Pro-3a,2,4,5b                            |
|                   | 3b |          | 2.22 m       |                                              | <sup>13</sup> Pro-2,3a,3b,5a,5b                        |
|                   | 4  | 25.8 t   | 1.87 m       | <sup>13</sup> Pro-2,3a,5a,5b                 | <sup>13</sup> Pro-4,5b                                 |
|                   | 5a | 48.6 t   | 3.53 m       | <sup>13</sup> Pro-3a,3b,4                    | <sup>13</sup> Pro-3b,4,5a, <sup>12</sup> Aib-3         |
|                   | 5b |          | 3.69 m       |                                              |                                                        |
| <sup>14</sup> Val | 1  | 172.7 s  |              | <sup>15</sup> Aib-NH, <sup>14</sup> Val-2    |                                                        |
|                   | 2  | 61.0 d   | 3.80 m       | <sup>14</sup> Val-3,4,5                      | <sup>14</sup> Val-4,5,3,NH,<br><sup>15</sup> Aib-NH    |
|                   | 3  | 28.9 d   | 2.21 m       | <sup>14</sup> Val-2,4,5                      | <sup>14</sup> Val-2,4,5,NH                             |
|                   | 4  | 19.2 q   | 0.95 d (6.4) | <sup>14</sup> Val-5,2,3                      | <sup>14</sup> Val-NH,2,3, <sup>11</sup> Leu-2          |
|                   | 5  | 19.2 q   | 0.89 d (6.8) | <sup>14</sup> Val-4,2,3                      | <sup>14</sup> Val-2,3                                  |
|                   | NH |          | 7.60 d       |                                              | <sup>14</sup> Val-2,3,4                                |

Table S9. Cont.

|                     |                   |                     |                     |                                                             |                                                        |
|---------------------|-------------------|---------------------|---------------------|-------------------------------------------------------------|--------------------------------------------------------|
| <sup>15</sup> Aib   | 1                 | 175.7 s             |                     | <sup>16</sup> Ile-NH,2,<br><sup>15</sup> Aib-NH,3,4         |                                                        |
|                     | 2                 | 55.8 s              |                     | <sup>15</sup> Aib-NH,3,4                                    |                                                        |
|                     | 3                 | 26.3 <sup>h</sup> q | 1.43 <sup>f</sup> s | <sup>15</sup> Aib-NH,4                                      | <sup>15</sup> Aib-NH                                   |
|                     | 4                 | 23.0 <sup>i</sup> q | 1.36 <sup>k</sup> s | <sup>15</sup> Aib-3                                         | <sup>15</sup> Aib-NH                                   |
|                     | NH                |                     | 7.47 s              |                                                             | <sup>15</sup> Aib-3,4, <sup>14</sup> Val-2             |
| <sup>16</sup> Ile   | 1                 | 172.4 s             |                     | <sup>17</sup> Gln-NH, <sup>16</sup> Ile-2                   |                                                        |
|                     | 2                 | 59.6 d              | 3.87 m              | <sup>16</sup> Ile-NH,6,4a,4b                                | <sup>16</sup> Ile-NH,5,6,4a,4b,3, <sup>17</sup> Gln-NH |
|                     | 3                 | 35.6 d              | 1.88 m              | <sup>16</sup> Ile-2,4a,5,6,NH                               | <sup>16</sup> Ile-NH,2,5,6                             |
|                     | 4a                | 25.4 t              | 1.20 m              | <sup>16</sup> Ile-2,3,5,6                                   | <sup>16</sup> Ile-2,4b,NH                              |
|                     | 4b                |                     | 1.50 m              |                                                             | <sup>16</sup> Ile-4a,5,2                               |
|                     | 5                 | 11.4 q              | 0.81 t (8.0)        | <sup>16</sup> Ile-4a,4b                                     | <sup>16</sup> Ile-4b,2,3                               |
|                     | 6                 | 15.8 q              | 0.85 d              | <sup>16</sup> Ile-4a,4b, 2                                  | <sup>16</sup> Ile-3,NH,2                               |
| NH                  |                   | 7.22 m              |                     | <sup>16</sup> Ile-2,3,4a, 6                                 |                                                        |
| <sup>17</sup> Gln   | 1                 | 171.8 s             |                     | <sup>18</sup> Gln-NH, <sup>17</sup> Gln-2                   |                                                        |
|                     | 2                 | 54.3 d              | 3.98 m              | <sup>17</sup> Gln-NH,4a,4b                                  | <sup>17</sup> Gln-NH,3,4a,4b,NH <sub>2</sub> b         |
|                     | 3                 | 26.9 t              | 1.93 m              | <sup>17</sup> Gln-2,4a,4b,NH                                | <sup>17</sup> Gln-NH,2                                 |
|                     | 4a                | 31.8 <sup>g</sup> t | 2.13 m              | <sup>17</sup> Gln-NH <sub>2</sub> a,2,3                     | <sup>17</sup> Gln-NH,2,NH <sub>2</sub> b               |
|                     | 4b                |                     | 2.23 m              |                                                             | <sup>17</sup> Gln-2,NH <sub>2</sub> b                  |
|                     | 5                 | 173.7 s             |                     | <sup>17</sup> Gln-4a,4b,NH <sub>2</sub> a,NH <sub>2</sub> b |                                                        |
|                     | NH <sub>2</sub> a |                     | 6.71 s              |                                                             | <sup>17</sup> Gln-NH <sub>2</sub> b                    |
| NH <sub>2</sub> b   |                   | 7.14 s              |                     | <sup>17</sup> Gln-NH <sub>2</sub> a,4a,4b,2                 |                                                        |
| NH                  |                   | 7.70 d (6.0)        |                     | <sup>17</sup> Gln-2,3,4a, <sup>16</sup> Ile-2               |                                                        |
| <sup>18</sup> Gln   | 1                 | 171.0 s             |                     | <sup>19</sup> Pheol-NH, <sup>18</sup> Gln-2                 |                                                        |
|                     | 2                 | 53.4 d              | 4.02 m              | <sup>18</sup> Gln-NH,3a,4a,4b                               | <sup>19</sup> Pheol-NH, <sup>18</sup> Gln-NH,3a, 3b,4b |
|                     | 3a                | 27.5                | 1.83 m              | <sup>18</sup> Gln-2,4a,4b,NH                                | <sup>18</sup> Gln-2,3b,4a                              |
|                     | 3b                |                     | 1.70 m              |                                                             | <sup>18</sup> Gln-2,3a,4a,NH                           |
|                     | 4a                | 31.7 <sup>g</sup> t | 2.05 m              | <sup>18</sup> Gln-NH <sub>2</sub> a,2,3a,3b                 | <sup>18</sup> Gln-3a,3b                                |
|                     | 4b                |                     | 1.98 m              |                                                             | <sup>18</sup> Gln-NH,NH <sub>2</sub> b,2               |
|                     | 5                 | 173.7 s             |                     | <sup>18</sup> Gln-NH <sub>2</sub> a,NH <sub>2</sub> b,4a,4b |                                                        |
|                     | NH <sub>2</sub> a |                     | 6.61 s              |                                                             | <sup>18</sup> Gln-NH <sub>2</sub> b                    |
| NH <sub>2</sub> b   |                   | 7.06 s              |                     | <sup>18</sup> Gln-NH <sub>2</sub> a,4b                      |                                                        |
| NH                  |                   | 7.46 d              |                     | <sup>18</sup> Gln-2,3b,4b                                   |                                                        |
| <sup>19</sup> Pheol | 1a                | 62.9 t              | 3.31 m              | <sup>19</sup> Pheol-2,3a,3b                                 | <sup>19</sup> Pheol-NH                                 |
|                     | 1b                |                     | 3.34 m              |                                                             | <sup>19</sup> Pheol-NH                                 |
|                     | 2                 | 52.7 d              | 3.87 m              | <sup>19</sup> Pheol-1a,1b,3a,3b,NH                          | <sup>19</sup> Pheol-NH,3a,3b,5                         |
|                     | 3a                | 36.8 t              | 2.63 dd (13.4, 8.4) | <sup>19</sup> Pheol-1a,1b,5                                 | <sup>19</sup> Pheol-NH,2                               |
|                     | 3b                |                     | 2.83 dd (13.5, 4.9) |                                                             | <sup>19</sup> Pheol-2                                  |
|                     | 4                 | 139.4 s             |                     | <sup>19</sup> Pheol-2,3a,3b,6                               |                                                        |
|                     | 5                 | 129.5 d             | 7.22 m              | <sup>19</sup> Pheol-3a,3b,5,7                               | <sup>19</sup> Pheol-2,7                                |
|                     | 6                 | 128.2 d             | 7.20 m              | <sup>19</sup> Pheol-6                                       |                                                        |
|                     | 7                 | 126.0 d             | 7.13 m              | <sup>19</sup> Pheol-5                                       | <sup>19</sup> Pheol-5                                  |
|                     | NH                |                     | 7.18 m              |                                                             | <sup>18</sup> Gln-2, <sup>19</sup> Pheol-1a,1b,2,3a    |

<sup>a</sup> Carried out on an AVANCE-400, Bruker instrument; <sup>b</sup> Multiplicity and assignment are from HSQC experiment; <sup>c</sup> Values determined from HMBC experiment; <sup>n</sup>J<sub>CH</sub> = 8 Hz, recycle time 1 s; <sup>d</sup> Selected NOE's from a ROESY experiment; <sup>e,f,g,h,i,j,k</sup> These signals may interchange.

Table S10. NMR data for TA.VIa<sup>a</sup> (10) in DMSO-*d*<sub>6</sub>.

| Position         | $\delta_C$ , mult. <sup>b</sup> | $\delta_H$ , mult., <i>J</i> (Hz) | LR C-H correlations <sup>c</sup>             | NOE correlations <sup>d</sup>                                |                                                                |
|------------------|---------------------------------|-----------------------------------|----------------------------------------------|--------------------------------------------------------------|----------------------------------------------------------------|
| Ac               | 1                               | 171.1 s                           | Ac-2, <sup>1</sup> Aib-NH,4                  |                                                              |                                                                |
|                  | 2                               | 23.1 q                            | 1.92 s                                       | <sup>1</sup> Aib-NH,3,4                                      |                                                                |
| <sup>1</sup> Aib | 1                               | 175.7 <sup>e</sup> s              | <sup>2</sup> Ala-NH, <sup>1</sup> Aib-NH,3,4 |                                                              |                                                                |
|                  | 2                               | 55.8 s                            | <sup>1</sup> Aib-NH,3,4                      |                                                              |                                                                |
|                  | 3                               | 26.2 <sup>h</sup> q               | 1.35 s                                       | <sup>1</sup> Aib-NH                                          | <sup>1</sup> Aib-NH                                            |
|                  | 4                               | 24.2 q                            | 1.32 s                                       | <sup>1</sup> Aib-3                                           | <sup>1</sup> Aib-NH                                            |
|                  | NH                              |                                   | 8.55 s                                       |                                                              | Ac-2, <sup>1</sup> Aib-3,4                                     |
| <sup>2</sup> Ala | 1                               | 174.5 s                           | -                                            | <sup>3</sup> Ala-NH, <sup>2</sup> Ala-2,3                    |                                                                |
|                  | 2                               | 50.9 d                            | 4.01 m                                       | <sup>2</sup> Ala-NH,3                                        | <sup>2</sup> Ala-NH,3                                          |
|                  | 3                               | 16.8 q                            | 1.31 d                                       | <sup>2</sup> Ala-NH,2                                        | <sup>2</sup> Ala-NH,2                                          |
|                  | NH                              |                                   | 8.24 d (5.5)                                 |                                                              | <sup>3</sup> Ala-NH, <sup>2</sup> Ala-2,3                      |
| <sup>3</sup> Ala | 1                               | 174.5 s                           | -                                            | <sup>4</sup> Aib-NH, <sup>3</sup> Ala-2,3                    |                                                                |
|                  | 2                               | 51.0 d                            | 4.01 m                                       | <sup>3</sup> Ala-NH,3                                        | <sup>3</sup> Ala-NH,3, <sup>4</sup> Aib-NH                     |
|                  | 3                               | 16.2 q                            | 1.33 d                                       | <sup>2</sup> Ala-NH,2                                        | <sup>3</sup> Ala-NH,2                                          |
|                  | NH                              |                                   | 7.68 d                                       |                                                              | <sup>2</sup> Ala-NH, <sup>3</sup> Ala-2,3                      |
| <sup>4</sup> Aib | 1                               | 175.0 s                           |                                              | <sup>5</sup> Iva-NH, <sup>4</sup> Aib-3                      |                                                                |
|                  | 2                               | 56.0 <sup>g</sup> s               |                                              | <sup>4</sup> Aib-NH,3,4                                      |                                                                |
|                  | 3                               | 26.2 <sup>h</sup> q               | 1.41 <sup>i</sup> s                          | <sup>4</sup> Aib-NH,4                                        | <sup>4</sup> Aib-NH                                            |
|                  | 4                               | 23.3 <sup>j</sup> q               | 1.35 <sup>k</sup> s                          | <sup>4</sup> Aib-NH,3                                        | <sup>4</sup> Aib-NH                                            |
|                  | NH                              |                                   | 7.86 s                                       |                                                              | <sup>4</sup> Aib-2,3, <sup>3</sup> Ala-2, <sup>5</sup> Iva-NH  |
| <sup>5</sup> Iva | 1                               | 176.4 s                           |                                              | <sup>6</sup> Gln-NH, <sup>5</sup> Iva-3,NH                   |                                                                |
|                  | 2                               | 58.6 s                            |                                              | <sup>5</sup> Iva-NH,3a,3b,4,5                                |                                                                |
|                  | 3a                              | 25.7 t                            | 2.20 m                                       | <sup>5</sup> Iva-4                                           | <sup>5</sup> Iva-4,3b                                          |
|                  | 3b                              |                                   | 1.62 m                                       |                                                              | <sup>5</sup> Iva-4,3a,5                                        |
|                  | 4                               | 7.4 q                             | 0.73 t                                       | <sup>5</sup> Iva-3a,3b                                       | <sup>5</sup> Iva-NH,3a,3b                                      |
|                  | 5                               | 22.5 q                            | 1.35 s                                       | <sup>5</sup> Iva-NH,3a,3b                                    | <sup>5</sup> Iva-NH,3b                                         |
|                  | NH                              |                                   | 7.48 s                                       |                                                              | <sup>5</sup> Iva-4,5, <sup>4</sup> Aib-NH                      |
| <sup>6</sup> Gln | 1                               | 173.8 s                           |                                              | <sup>7</sup> Aib-NH, <sup>6</sup> Gln-2                      |                                                                |
|                  | 2                               | 56.0 d                            | 3.78 m                                       | <sup>6</sup> Gln-NH,3,4a,4b                                  | <sup>7</sup> Aib-NH, <sup>6</sup> Gln-NH,3,4a,4b               |
|                  | 3                               | 26.3 t                            | 1.97 m                                       | <sup>6</sup> Gln-2,4a,4b,NH                                  | <sup>6</sup> Gln-2,4a,4b,NH                                    |
|                  | 4a                              | 31.6 <sup>f</sup> t               | 2.15 m                                       | <sup>6</sup> Gln-2, NH <sub>2</sub> b                        | <sup>6</sup> Gln-2,3,4b,NH <sub>2</sub> a                      |
|                  | 4b                              |                                   | 2.25 m                                       |                                                              | <sup>6</sup> Gln-2,3,4a                                        |
|                  | 5                               | 173.7 s                           |                                              | <sup>6</sup> Gln-3,4a,4b,NH <sub>2</sub> a,NH <sub>2</sub> b |                                                                |
|                  | NH <sub>2</sub> a               |                                   | 7.15 s                                       |                                                              | <sup>6</sup> Gln-4a,NH <sub>2</sub> b                          |
|                  | NH <sub>2</sub> b               |                                   | 6.75 s                                       |                                                              | <sup>6</sup> Gln-NH <sub>2</sub> a                             |
| NH               |                                 | 7.73 m                            |                                              | <sup>6</sup> Gln-2,3                                         |                                                                |
| <sup>7</sup> Aib | 1                               | 175.8 <sup>e</sup> s              |                                              | <sup>8</sup> Aib-NH, <sup>7</sup> Aib-NH,3,4                 |                                                                |
|                  | 2                               | 56.1 <sup>g</sup> s               |                                              | <sup>7</sup> Aib-NH,3,4                                      |                                                                |
|                  | 3                               | 26.5 <sup>h</sup> q               | 1.41 <sup>i</sup> s                          | <sup>7</sup> Aib-NH,4                                        | <sup>7</sup> Aib-NH                                            |
|                  | 4                               | 23.3 <sup>j</sup> q               | 1.35 <sup>k</sup> s                          | <sup>7</sup> Aib-3                                           | <sup>7</sup> Aib-NH                                            |
|                  | NH                              |                                   | 7.85 s                                       |                                                              | <sup>6</sup> Gln-2, <sup>7</sup> Aib-3,4, <sup>8</sup> Aib-NH  |
| <sup>8</sup> Aib | 1                               | 175.9 <sup>e</sup> s              |                                              | <sup>9</sup> Aib-NH, <sup>8</sup> Aib-3,4                    |                                                                |
|                  | 2                               | 56.1 <sup>g</sup> s               |                                              | <sup>8</sup> Aib-NH,3,4                                      |                                                                |
|                  | 3                               | 26.5 <sup>h</sup> q               | 1.42 <sup>i</sup> s                          | <sup>8</sup> Aib-NH,4                                        | <sup>8</sup> Aib-NH                                            |
|                  | 4                               | 22.7 <sup>j</sup> q               | 1.37 <sup>k</sup> s                          | <sup>8</sup> Aib-3                                           | <sup>8</sup> Aib-NH                                            |
|                  | NH                              |                                   | 7.54 s                                       |                                                              | <sup>8</sup> Aib-3,4, <sup>7</sup> Aib-NH, <sup>9</sup> Aib-NH |

Table S10. Cont.

|                   |    |          |              |                                                  |                                                                  |
|-------------------|----|----------|--------------|--------------------------------------------------|------------------------------------------------------------------|
| <sup>9</sup> Aib  | 1  | 176.4 s  |              | <sup>10</sup> Ser-NH, <sup>9</sup> Aib-3,4       |                                                                  |
|                   | 2  | 56.1 g s |              | <sup>9</sup> Aib-NH,3,4                          |                                                                  |
|                   | 3  | 26.4 h q | 1.46 s       | <sup>9</sup> Aib-NH,4                            |                                                                  |
|                   | 4  | 23.1 j q | 1.42 s       | <sup>9</sup> Aib-3                               | <sup>9</sup> Aib-NH                                              |
|                   | NH |          | 7.76 s       |                                                  | <sup>9</sup> Aib-3,4, <sup>8</sup> Aib-NH                        |
| <sup>10</sup> Ser | 1  | 170.6 s  |              | <sup>11</sup> Leu-NH, <sup>10</sup> Ser-2,3a,3b  | -                                                                |
|                   | 2  | 58.9 d   | 4.01 m       | <sup>10</sup> Ser-NH                             | <sup>10</sup> Ser-NH                                             |
|                   | 3a | 61.2 t   | 3.74 m       | <sup>10</sup> Ser-NH,2                           |                                                                  |
|                   | 3b |          | 3.78 m       |                                                  | <sup>10</sup> Ser-NH                                             |
|                   | OH |          | -            | -                                                |                                                                  |
|                   | NH |          | 7.73 m       |                                                  | <sup>10</sup> Ser-2,3b                                           |
| <sup>11</sup> Leu | 1  | 173.7 s  | -            | <sup>12</sup> Aib-NH, <sup>11</sup> Leu-2        |                                                                  |
|                   | 2  | 51.5 d   | 4.26 m       | <sup>11</sup> Leu-NH,3b                          | <sup>11</sup> Leu-NH,5,3a,3b, <sup>13</sup> Pro-5a               |
|                   | 3a | 39.2 t   | 1.56 m       | <sup>11</sup> Leu-2,5,6                          | <sup>11</sup> Leu-2,3b,5                                         |
|                   | 3b |          | 1.70 m       |                                                  | <sup>11</sup> Leu-NH,2,3a,5                                      |
|                   | 4  | 24.0 d   | 1.73 m       | <sup>11</sup> Leu-5,6                            | <sup>11</sup> Leu-NH,6                                           |
|                   | 5  | 20.5 q   | 0.75 d       | <sup>11</sup> Leu-6,3b                           | <sup>11</sup> Leu-2,3b,3a                                        |
|                   | 6  | 22.9 q   | 0.81 d       | <sup>11</sup> Leu-5,3b                           | <sup>11</sup> Leu-4                                              |
|                   | NH |          | 7.58 d (7.5) |                                                  | <sup>11</sup> Leu-2,3b,4, <sup>12</sup> Aib-NH                   |
| <sup>12</sup> Aib | 1  | 172.9 s  |              | <sup>12</sup> Aib-NH,3,4                         |                                                                  |
|                   | 2  | 56.2 g s |              | <sup>12</sup> Aib-NH,3,4                         |                                                                  |
|                   | 3  | 25.9 q   | 1.39 s       | <sup>12</sup> Aib-4                              | <sup>12</sup> Aib-NH                                             |
|                   | 4  | 22.9 j q | 1.48 s       | <sup>12</sup> Aib-NH,3                           | <sup>12</sup> Aib-NH, <sup>13</sup> Pro-5b                       |
|                   | NH |          | 7.88 s       |                                                  | <sup>11</sup> Leu-NH, <sup>12</sup> Aib-3,4                      |
| <sup>13</sup> Pro | 1  | 173.3 s  | -            | <sup>14</sup> Leu-NH, <sup>13</sup> Pro-2,3a     | -                                                                |
|                   | 2  | 63.0 d   | 4.21 t (8.0) | <sup>13</sup> Pro-3a,4                           | <sup>13</sup> Pro-4,3b                                           |
|                   | 3a | 28.7 t   | 1.59 m       | <sup>13</sup> Pro-4,2,5b,5a                      | <sup>13</sup> Pro-3b                                             |
|                   | 3b |          | 2.23 m       |                                                  | <sup>13</sup> Pro-3a,2,4                                         |
|                   | 4  | 25.9 t   | 1.86 m       | <sup>13</sup> Pro-2,5a,5b                        | <sup>13</sup> Pro-2,3b,5a,5b                                     |
|                   | 5a | 48.7 t   | 3.44 m       | <sup>13</sup> Pro-3b,3a                          | <sup>13</sup> Pro-2,4,5b, <sup>11</sup> Leu-2                    |
|                   | 5b |          | 3.68 m       |                                                  | <sup>13</sup> Pro-4,5a, <sup>12</sup> Aib-3                      |
| <sup>14</sup> Leu | 1  | 173.7 s  | -            | <sup>15</sup> Aib-NH, <sup>14</sup> Leu-2        | -                                                                |
|                   | 2  | 53.5 d   | 3.93 m       | <sup>14</sup> Leu-NH                             | <sup>14</sup> Leu-4,3a,6,NH, <sup>15</sup> Aib-NH                |
|                   | 3a | 38.8 t   | 1.51 m       | <sup>14</sup> Leu-2,4,5,6                        | <sup>14</sup> Leu-2,3b,6                                         |
|                   | 3b |          | 1.78 m       |                                                  | <sup>14</sup> Leu-3a,6,NH                                        |
|                   | 4  | 24.8 d   | 1.68 m       | <sup>14</sup> Leu-5,6,2                          | <sup>14</sup> Leu-2,5,NH                                         |
|                   | 5  | 22.9 q   | 0.91 d (6.0) | <sup>14</sup> Leu-6,4                            | <sup>14</sup> Leu-4                                              |
|                   | 6  | 21.1 q   | 0.82 d       | <sup>14</sup> Leu-5,3b,4                         | <sup>14</sup> Leu-2,3a,3b                                        |
|                   | NH |          | 7.71 m       |                                                  | <sup>14</sup> Leu-2,3b,4                                         |
| <sup>15</sup> Aib | 1  | 175.3 s  |              | <sup>16</sup> Ile-2,NH, <sup>15</sup> Aib-NH,3,4 |                                                                  |
|                   | 2  | 56.3 s   |              | <sup>15</sup> Aib-NH,3,4                         |                                                                  |
|                   | 3  | 26.5 h q | 1.43 i s     | <sup>15</sup> Aib-4                              | <sup>15</sup> Aib-NH                                             |
|                   | 4  | 23.2 j q | 1.33 k s     | <sup>15</sup> Aib-NH,3                           | <sup>15</sup> Aib-NH                                             |
|                   | NH |          | 7.62 s       |                                                  | <sup>15</sup> Aib-3,4, <sup>16</sup> Ile-NH, <sup>14</sup> Leu-2 |

Table S10. Cont.

|                     |                   |                     |                     |                                                                       |                                                           |
|---------------------|-------------------|---------------------|---------------------|-----------------------------------------------------------------------|-----------------------------------------------------------|
| <sup>16</sup> Ile   | 1                 | 172.0 s             | -                   | <sup>17</sup> Gln-NH, <sup>16</sup> Ile-2,3                           | -                                                         |
|                     | 2                 | 58.9 d              | 3.91 t (6.8)        | <sup>16</sup> Ile-NH,6,3,4a,4b                                        | <sup>16</sup> Ile-NH,5,6,4a,4b,3,<br><sup>17</sup> Gln-NH |
|                     | 3                 | 35.7 d              | 1.87 m              | <sup>16</sup> Ile-2,4a,4b,5,6,NH                                      | <sup>16</sup> Ile-NH,2,6                                  |
|                     | 4a                | 25.1 t              | 1.20 m              | <sup>16</sup> Ile-2,5,6                                               | <sup>16</sup> Ile-NH,4b,2                                 |
|                     | 4b                |                     | 1.47 m              |                                                                       | <sup>16</sup> Ile-NH,2,4a                                 |
|                     | 5                 | 11.4 q              | 0.81 t              | <sup>16</sup> Ile-4a,4b                                               | <sup>16</sup> Ile-2                                       |
|                     | 6                 | 15.7 q              | 0.84 d (6.5)        | <sup>16</sup> Ile-4a,4b,2                                             | <sup>16</sup> Ile-2,3                                     |
|                     | NH                |                     | 6.95 d (6.5)        |                                                                       | <sup>16</sup> Ile-2,3,4a,4b, <sup>15</sup> Aib-NH         |
| <sup>17</sup> Gln   | 1                 | 171.5 s             |                     | <sup>18</sup> Gln-NH, <sup>17</sup> Gln-2                             |                                                           |
|                     | 2                 | 53.8 d              | 4.03 m              | <sup>17</sup> Gln-NH,4a,4b                                            | <sup>17</sup> Gln-NH,3,4a,4b                              |
|                     | 3                 | 27.2 t              | 1.84 m              | <sup>17</sup> Gln-2,4a,4b,NH                                          | <sup>17</sup> Gln-NH,2                                    |
|                     | 4a                | 31.7 <sup>f</sup> t | 2.08 m              | <sup>17</sup> Gln-NH <sub>2</sub> a,2,3                               | <sup>17</sup> Gln-NH,2,NH <sub>2</sub> b                  |
|                     | 4b                |                     | 2.18 m              |                                                                       | <sup>17</sup> Gln-2,NH <sub>2</sub> b                     |
|                     | 5                 | 173.6 s             |                     | <sup>17</sup> Gln-3,4a,4b,NH <sub>2</sub> a,NH <sub>2</sub> b         |                                                           |
|                     | NH <sub>2</sub> a |                     | 6.71 s              |                                                                       | <sup>17</sup> Gln-NH <sub>2</sub> b                       |
|                     | NH <sub>2</sub> b |                     | 7.15 s              |                                                                       | <sup>17</sup> Gln-NH <sub>2</sub> a,4a,4b                 |
| NH                  |                   | 7.70 m              |                     | <sup>17</sup> Gln-2,3,4a, <sup>16</sup> Ile-2                         |                                                           |
| <sup>18</sup> Gln   | 1                 | 170.9 s             |                     | <sup>19</sup> Pheol-NH, <sup>18</sup> Gln-2,3a,3b                     |                                                           |
|                     | 2                 | 53.1 d              | 4.05 m              | <sup>18</sup> Gln-NH,3a,4a,4b                                         | <sup>19</sup> Pheol-NH,<br><sup>18</sup> Gln-NH,3a,3b,4b  |
|                     | 3a                | 27.7 t              | 1.81 m              | <sup>18</sup> Gln-2,4a,4b,NH                                          | <sup>18</sup> Gln-2,3b,4a                                 |
|                     | 3b                |                     | 1.70 m              |                                                                       | <sup>18</sup> Gln-NH,2,3a,4b                              |
|                     | 4a                | 31.8 <sup>f</sup> t | 2.04 m              | <sup>18</sup> Gln-NH <sub>2</sub> a,2,3a,3b                           | <sup>18</sup> Gln-3a                                      |
|                     | 4b                |                     | 1.95 m              |                                                                       | <sup>18</sup> Gln-NH, NH <sub>2</sub> b,2,3b              |
|                     | 5                 | 173.6 s             |                     | <sup>18</sup> Gln-NH <sub>2</sub> a,<br>NH <sub>2</sub> b,3a,3b,4a,4b |                                                           |
|                     | NH <sub>2</sub> a |                     | 6.64 s              |                                                                       | <sup>18</sup> Gln-NH <sub>2</sub> b                       |
| NH <sub>2</sub> b   |                   | 7.10 s              |                     | <sup>18</sup> Gln-NH <sub>2</sub> a,4b                                |                                                           |
| NH                  |                   | 7.47 d              |                     | <sup>18</sup> Gln-2,3b,4b                                             |                                                           |
| <sup>19</sup> Pheol | 1a                | 62.7 t              | 3.29 m              | <sup>19</sup> Pheol-2,3a,3b                                           | <sup>19</sup> Pheol-NH,2,5                                |
|                     | 1b                |                     | 3.32 m              |                                                                       | <sup>19</sup> Pheol-NH,2                                  |
|                     | 2                 | 52.6 d              | 3.86 m              | <sup>19</sup> Pheol-1a,1b,3a,3b,NH                                    | <sup>19</sup> Pheol-NH,1a,1b,3a,3b,5                      |
|                     | 3a                | 36.7 t              | 2.61 dd (13.8, 8.3) | <sup>19</sup> Pheol-1a,1b,2,5                                         | <sup>19</sup> Pheol-NH, 2                                 |
|                     | 3b                |                     | 2.83 dd (13.5, 5.5) |                                                                       | <sup>19</sup> Pheol-2                                     |
|                     | 4                 | 139.2 s             |                     | <sup>19</sup> Pheol-2,3a,3b,5,7                                       |                                                           |
|                     | 5                 | 129.4 d             | 7.20 m              | <sup>19</sup> Pheol-3a,3b,6,7                                         | <sup>19</sup> Pheol-1a,2,7                                |
|                     | 6                 | 128.2 d             | 7.19 m              | <sup>19</sup> Pheol-5,7                                               |                                                           |
|                     | 7                 | 126.0 d             | 7.12 m              | <sup>19</sup> Pheol-5                                                 | <sup>19</sup> Pheol-5                                     |
|                     | NH                |                     | 7.27 d (8.5)        |                                                                       | <sup>18</sup> Gln-2, <sup>19</sup> Pheol-1a,1b,2,3a       |

<sup>a</sup> Carried out on an AVANCE-400, Bruker instrument; <sup>b</sup> Multiplicity and assignment are from HSQC experiment; <sup>c</sup> Values determined from HMBC experiment; <sup>n</sup>J<sub>CH</sub>=8 Hz, recycle time 1 s; <sup>d</sup> Selected NOE's from a ROESY experiment; <sup>e,f,g,h,i,j,k</sup> These signals may interchange.



Table S11. NMR data for TA.VII<sup>a</sup> (11) in DMSO-*d*<sub>6</sub>.

| Position         | $\delta_C$ , mult. <sup>b</sup> | $\delta_H$ , mult., <i>J</i> (Hz) | LR C-H correlations <sup>c</sup>              | NOE correlations <sup>d</sup>                                |                                                                |
|------------------|---------------------------------|-----------------------------------|-----------------------------------------------|--------------------------------------------------------------|----------------------------------------------------------------|
| Ac               | 1                               | 171.0 s                           | Ac-2, <sup>1</sup> Aib-NH                     |                                                              |                                                                |
|                  | 2                               | 23.0 q                            | 1.92 s                                        | <sup>1</sup> Aib-NH                                          |                                                                |
| <sup>1</sup> Aib | 1                               | 175.9 <sup>e</sup> s              | <sup>2</sup> Ala-NH, <sup>1</sup> Aib-NH,3,4  |                                                              |                                                                |
|                  | 2                               | 55.8 s                            | <sup>1</sup> Aib-NH,3,4                       |                                                              |                                                                |
|                  | 3                               | 26.5 <sup>h</sup> q               | 1.34 s                                        | <sup>1</sup> Aib-NH                                          | <sup>1</sup> Aib-NH                                            |
|                  | 4                               | 24.2 q                            | 1.32 s                                        | <sup>1</sup> Aib-3                                           | <sup>1</sup> Aib-NH                                            |
|                  | NH                              |                                   | 8.55 s                                        |                                                              | Ac-2, <sup>1</sup> Aib-3,4                                     |
| <sup>2</sup> Ala | 1                               | 174.5 s                           | <sup>3</sup> Ala-NH, <sup>2</sup> Ala-2,3     |                                                              |                                                                |
|                  | 2                               | 50.9 d                            | 3.99 m                                        | <sup>2</sup> Ala-NH,3                                        | <sup>2</sup> Ala-NH,3                                          |
|                  | 3                               | 16.8 q                            | 1.30 d                                        | <sup>2</sup> Ala-NH,2                                        | <sup>2</sup> Ala-NH,2                                          |
|                  | NH                              |                                   | 8.24 d (5.6)                                  |                                                              | <sup>2</sup> Ala-2,3, <sup>3</sup> Ala-NH                      |
| <sup>3</sup> Ala | 1                               | 174.5 s                           | <sup>4</sup> Aib-NH, <sup>3</sup> Ala-2,3     |                                                              |                                                                |
|                  | 2                               | 51.0 d                            | 4.01 m                                        | <sup>3</sup> Ala-NH,3                                        | <sup>3</sup> Ala-NH,3, <sup>4</sup> Aib-NH                     |
|                  | 3                               | 16.2 q                            | 1.33 d (7.5)                                  | <sup>2</sup> Ala-NH,2                                        | <sup>3</sup> Ala-NH,2                                          |
|                  | NH                              |                                   | 7.68 d                                        |                                                              | <sup>4</sup> Aib-NH, <sup>3</sup> Ala-2,3, <sup>2</sup> Ala-NH |
| <sup>4</sup> Aib | 1                               | 175.0 s                           | <sup>5</sup> Iva-NH, <sup>4</sup> Aib-3       |                                                              |                                                                |
|                  | 2                               | 56.0 <sup>i</sup> s               |                                               | <sup>4</sup> Aib-NH,3,4                                      |                                                                |
|                  | 3                               | 26.5 <sup>h</sup> q               | 1.43 <sup>j</sup> s                           | <sup>4</sup> Aib-NH,4                                        | <sup>4</sup> Aib-NH                                            |
|                  | 4                               | 23.0 <sup>g</sup> q               | 1.34 <sup>k</sup> s                           | <sup>4</sup> Aib-NH,3                                        | <sup>4</sup> Aib-NH                                            |
|                  | NH                              |                                   | 7.86 s                                        |                                                              | <sup>4</sup> Aib-2,3, <sup>3</sup> Ala-NH,2                    |
| <sup>5</sup> Iva | 1                               | 176.4 s                           | <sup>6</sup> Gln-NH,2, <sup>5</sup> Iva-3a,NH |                                                              |                                                                |
|                  | 2                               | 58.6 s                            | <sup>5</sup> Iva-NH,3a,3b,4,5                 |                                                              |                                                                |
|                  | 3a                              | 25.6 t                            | 2.20 m                                        | <sup>5</sup> Iva-4                                           | <sup>5</sup> Iva-NH,4,3b                                       |
|                  | 3b                              |                                   | 1.62 m                                        |                                                              | <sup>5</sup> Iva-4,3a                                          |
|                  | 4                               | 7.4 q                             | 0.73 t (7.2)                                  | <sup>5</sup> Iva-3a,3b                                       | <sup>5</sup> Iva-NH,3a,3b                                      |
|                  | 5                               | 22.7 q                            | 1.35 s                                        | <sup>5</sup> Iva-NH,3a,3b                                    | <sup>5</sup> Iva-NH                                            |
|                  | NH                              |                                   | 7.46 s                                        |                                                              | <sup>5</sup> Iva-4,5,3a                                        |
| <sup>6</sup> Gln | 1                               | 173.8 s                           | <sup>7</sup> Aib-NH, <sup>6</sup> Gln-2       |                                                              |                                                                |
|                  | 2                               | 56.0 d                            | 3.77 m                                        | <sup>6</sup> Gln-NH,3,4a,4b                                  | <sup>7</sup> Aib-NH, <sup>6</sup> Gln-NH,3,4a,4b               |
|                  | 3                               | 26.2 t                            | 1.97 m                                        | <sup>6</sup> Gln-2,4a,4b,NH                                  | <sup>6</sup> Gln-2,4a,4b,NH, <sup>7</sup> Aib-NH               |
|                  | 4a                              | 31.6 <sup>f</sup> t               | 2.14 m                                        | <sup>6</sup> Gln-2,3,NH <sub>2</sub> b                       | <sup>6</sup> Gln-NH <sub>2</sub> a,2,3,4b                      |
|                  | 4b                              |                                   | 2.23 m                                        |                                                              | <sup>6</sup> Gln-NH <sub>2</sub> a,2,3,4a                      |
|                  | 5                               | 173.6 s                           |                                               | <sup>6</sup> Gln-3,4a,4b,NH <sub>2</sub> a,NH <sub>2</sub> b |                                                                |
|                  | NH <sub>2</sub> a               |                                   | 7.16 s                                        |                                                              | <sup>6</sup> Gln-4a,NH <sub>2</sub> b,4a,4b                    |
|                  | NH <sub>2</sub> b               |                                   | 6.75 s                                        |                                                              | <sup>6</sup> Gln-NH <sub>2</sub> a                             |
|                  | NH                              |                                   | 7.72 m                                        |                                                              | <sup>6</sup> Gln-2,3                                           |
| <sup>7</sup> Aib | 1                               | 175.8 <sup>e</sup> s              | <sup>8</sup> Aib-NH, <sup>7</sup> Aib-NH,3,4  |                                                              |                                                                |
|                  | 2                               | 56.1 <sup>i</sup> s               |                                               | <sup>7</sup> Aib-NH,3,4                                      |                                                                |
|                  | 3                               | 26.5 <sup>h</sup> q               | 1.42 <sup>j</sup> s                           | <sup>7</sup> Aib-NH,4                                        | <sup>7</sup> Aib-NH                                            |
|                  | 4                               | 23.3 <sup>g</sup> q               | 1.34 <sup>k</sup> s                           | <sup>7</sup> Aib-NH,3                                        | <sup>7</sup> Aib-NH                                            |
|                  | NH                              |                                   | 7.85 s                                        |                                                              | <sup>6</sup> Gln-2,3, <sup>7</sup> Aib-3,4                     |
| <sup>8</sup> Aib | 1                               | 175.7 <sup>e</sup> s              | <sup>9</sup> Aib-NH, <sup>8</sup> Aib-3,4     |                                                              |                                                                |
|                  | 2                               | 55.9 <sup>i</sup> s               |                                               | <sup>8</sup> Aib-NH,3,4                                      |                                                                |
|                  | 3                               | 26.3 <sup>h</sup> q               | 1.41 <sup>j</sup> s                           | <sup>8</sup> Aib-NH,4                                        | <sup>8</sup> Aib-NH                                            |
|                  | 4                               | 22.9 <sup>g</sup> q               | 1.37 <sup>k</sup> s                           | <sup>8</sup> Aib-3                                           | <sup>8</sup> Aib-NH                                            |
|                  | NH                              |                                   | 7.54 s                                        |                                                              | <sup>8</sup> Aib-3,4                                           |

Table S11. Cont.

|                   |    |                     |                     |                                                  |                                                                              |
|-------------------|----|---------------------|---------------------|--------------------------------------------------|------------------------------------------------------------------------------|
| <sup>9</sup> Aib  | 1  | 176.5 s             |                     | <sup>10</sup> Ser-NH, <sup>9</sup> Aib-3,4       |                                                                              |
|                   | 2  | 56.1 <sup>i</sup> s |                     | <sup>9</sup> Aib-NH,3,4                          |                                                                              |
|                   | 3  | 26.6 q              | 1.45 s              | <sup>9</sup> Aib-NH,4                            | <sup>9</sup> Aib-NH                                                          |
|                   | 4  | 22.9 <sup>g</sup> q | 1.41 s              | <sup>9</sup> Aib-3                               | <sup>9</sup> Aib-NH                                                          |
|                   | NH |                     | 7.76 s              |                                                  | <sup>9</sup> Aib-3,4                                                         |
| <sup>10</sup> Ser | 1  | 170.6 s             |                     | <sup>11</sup> Leu-NH, <sup>10</sup> Ser-2,3a     |                                                                              |
|                   | 2  | 58.9 d              | 4.02 m              | <sup>10</sup> Ser-NH                             | <sup>10</sup> Ser-NH,3a,3b                                                   |
|                   | 3a | 61.1 t              | 3.72 m              | <sup>10</sup> Ser-NH,2                           | <sup>10</sup> Ser-NH,2                                                       |
|                   | 3b |                     | 3.78 m              |                                                  | <sup>10</sup> Ser-NH,2                                                       |
|                   | NH |                     | 7.72 m              |                                                  | <sup>10</sup> Ser-2,3a,3b                                                    |
| <sup>11</sup> Leu | 1  | 173.5 s             |                     | <sup>12</sup> Aib-NH, <sup>11</sup> Leu-2        |                                                                              |
|                   | 2  | 51.3 d              | 4.27 m              | <sup>11</sup> Leu-NH,3b                          | <sup>12</sup> Aib-NH,<br><sup>11</sup> Leu-NH,5,3a,3b,4, <sup>14</sup> Val-4 |
|                   | 3a | 39.8 t              | 1.53 m              | <sup>11</sup> Leu-2,5,6                          | <sup>11</sup> Leu-2,5                                                        |
|                   | 3b |                     | 1.68 m              |                                                  | <sup>11</sup> Leu-NH,2,5,6                                                   |
|                   | 4  | 24.2 d              | 1.68 m              | <sup>11</sup> Leu-5,6                            | <sup>11</sup> Leu-NH,2,5,6                                                   |
|                   | 5  | 20.8 q              | 0.75 d              | <sup>11</sup> Leu-6,4                            | <sup>11</sup> Leu-2,3a,3b                                                    |
|                   | 6  | 23.2 q              | 0.82 d              | <sup>11</sup> Leu-5,3a                           | <sup>11</sup> Leu-3b                                                         |
|                   | NH |                     | 7.60 m              |                                                  | <sup>11</sup> Leu-2,3b,4                                                     |
| <sup>12</sup> Aib | 1  | 172.7 s             |                     | <sup>12</sup> Aib-NH,3,4                         |                                                                              |
|                   | 2  | 56.2 <sup>i</sup> s |                     | <sup>12</sup> Aib-NH,3,4                         |                                                                              |
|                   | 3  | 26.0 <sup>h</sup> q | 1.38 s              |                                                  | <sup>12</sup> Aib-NH                                                         |
|                   | 4  | 23.0 <sup>g</sup> q | 1.48 s              | <sup>12</sup> Aib-NH,3                           | <sup>12</sup> Aib-NH, <sup>13</sup> Pro-5b,2                                 |
|                   | NH |                     | 7.93 s              |                                                  | <sup>11</sup> Leu-2, <sup>12</sup> Aib-3,4                                   |
| <sup>13</sup> Pro | 1  | 173.7 s             |                     | <sup>14</sup> Val-NH, <sup>13</sup> Pro-2,3a     |                                                                              |
|                   | 2  | 63.0 d              | 4.24 t (7.6)        | <sup>13</sup> Pro-3a,3b,4,5b                     | <sup>14</sup> Val-NH, <sup>13</sup> Pro-4, 3a,3b,<br><sup>12</sup> Aib-3     |
|                   | 3a | 28.8 t              | 1.65 m              | <sup>13</sup> Pro-2,4                            | <sup>13</sup> Pro-2,3b, 5a,4                                                 |
|                   | 3b |                     | 2.22 m              |                                                  | <sup>13</sup> Pro-3a,2,4                                                     |
|                   | 4  | 26.0 t              | 1.86 m              | <sup>13</sup> Pro-2,3a,5a,5b                     | <sup>13</sup> Pro-2,3a,3b,5a,5b                                              |
|                   | 5a | 48.4 t              | 3.52 m              | <sup>13</sup> Pro-3a,3b,2,4                      | <sup>13</sup> Pro-3a,4,5b                                                    |
|                   | 5b |                     | 3.67 m              |                                                  | <sup>13</sup> Pro-4,5a, <sup>12</sup> Aib-3                                  |
| <sup>14</sup> Val | 1  | 172.6 s             |                     | <sup>15</sup> Aib-NH, <sup>14</sup> Val-2        |                                                                              |
|                   | 2  | 60.9 d              | 3.78 m              | <sup>14</sup> Val-3,4,5,NH                       | <sup>14</sup> Val,5,3,NH, <sup>15</sup> Aib-NH                               |
|                   | 3  | 28.8 d              | 2.21 m              | <sup>14</sup> Val-2,4,5,NH                       | <sup>14</sup> Val-2,4,5,NH                                                   |
|                   | 4  | 19.1 q              | 0.93 d (6.4)        | <sup>14</sup> Val-5,2,3                          | <sup>14</sup> Val-NH,3, <sup>11</sup> Leu-2                                  |
|                   | 5  | 19.1 q              | 0.87 d (6.8)        | <sup>14</sup> Val-4,2,3                          | <sup>14</sup> Val-2,3                                                        |
|                   | NH |                     | 7.59 d              |                                                  | <sup>14</sup> Val-2,3,4, <sup>13</sup> Pro-2                                 |
| <sup>15</sup> Aib | 1  | 175.6 s             |                     | <sup>16</sup> Ile-NH,2, <sup>15</sup> Aib-NH,3,4 |                                                                              |
|                   | 2  | 56.2 s              |                     | <sup>15</sup> Aib-NH,3,4                         |                                                                              |
|                   | 3  | 26.1 <sup>h</sup> q | 1.41 <sup>j</sup> s |                                                  | <sup>15</sup> Aib-NH                                                         |
|                   | 4  | 23.2 <sup>g</sup> q | 1.38 <sup>k</sup> s | <sup>15</sup> Aib-NH,3                           | <sup>15</sup> Aib-NH                                                         |
|                   | NH |                     | 7.43 s              |                                                  | <sup>15</sup> Aib-3,4, <sup>14</sup> Val-2                                   |

Table S11. Cont.

|                     |                   |                     |                       |                                                                   |                                                   |
|---------------------|-------------------|---------------------|-----------------------|-------------------------------------------------------------------|---------------------------------------------------|
| <sup>16</sup> Ile   | 1                 | 172.3 s             |                       | <sup>17</sup> Gln-NH, <sup>16</sup> Ile-2                         |                                                   |
|                     | 2                 | 59.5 d              | 3.85 m                | <sup>16</sup> Ile-NH,6,4a,4b,3                                    | <sup>16</sup> Ile-NH,5,4a,3, <sup>17</sup> Gln-NH |
|                     | 3                 | 35.5 d              | 1.87 m                | <sup>16</sup> Ile-2,4a,4b,5,6,NH                                  | <sup>16</sup> Ile-NH,2,6                          |
|                     | 4a                | 25.4 t              | 1.20 m                | <sup>16</sup> Ile-2,3,5,6                                         | <sup>16</sup> Ile-2,4b,NH                         |
|                     | 4b                |                     | 1.50 m                |                                                                   | <sup>16</sup> Ile-4a,5                            |
|                     | 5                 | 11.4 q              | 0.80 t (7.2)          | <sup>16</sup> Ile-4a,4b                                           | <sup>16</sup> Ile-4b,2,NH                         |
|                     | 6                 | 15.7 q              | 0.84 d                | <sup>16</sup> Ile-4a,4b,2                                         | <sup>16</sup> Ile-3                               |
|                     | NH                |                     | 7.21 m                |                                                                   | <sup>16</sup> Ile-2,3,4a,5                        |
| <sup>17</sup> Gln   | 1                 | 171.8 s             |                       | <sup>18</sup> Gln-NH, <sup>17</sup> Gln-2                         |                                                   |
|                     | 2                 | 54.3 d              | 3.97 m                | <sup>17</sup> Gln-NH,4a,4b,3                                      | <sup>17</sup> Gln-NH,3,4a,4b,NH <sub>2</sub> b    |
|                     | 3                 | 26.8 t              | 1.93 m                | <sup>17</sup> Gln-2,4a,4b                                         | <sup>17</sup> Gln-NH,2                            |
|                     | 4a                | 31.7 <sup>f</sup> t | 2.13 m                | <sup>17</sup> Gln-NH <sub>2</sub> a,2,3                           | <sup>17</sup> Gln-NH,2,NH <sub>2</sub> b          |
|                     | 4b                |                     | 2.23 m                |                                                                   | <sup>17</sup> Gln-2,NH <sub>2</sub> b             |
|                     | 5                 | 173.6 s             |                       | <sup>17</sup> Gln-3,4a,4b,NH <sub>2</sub> a,NH <sub>2</sub> b     |                                                   |
|                     | NH <sub>2</sub> a |                     | 6.72 s                |                                                                   | <sup>17</sup> Gln-NH <sub>2</sub> b               |
|                     | NH <sub>2</sub> b |                     | 7.16 s                |                                                                   | <sup>17</sup> Gln-NH <sub>2</sub> a,4a,4b,2       |
|                     | NH                |                     | 7.70 m                |                                                                   | <sup>17</sup> Gln-2,3,4a, <sup>16</sup> Ile-2     |
| <sup>18</sup> Gln   | 1                 | 171.0 s             |                       | <sup>19</sup> Pheol-NH, <sup>18</sup> Gln-2,3a,3b                 |                                                   |
|                     | 2                 | 53.4 d              | 4.00 m                | <sup>18</sup> Gln-NH,3a,3b,4a,4b                                  | <sup>19</sup> Pheol-NH,                           |
|                     | 3a                | 27.5                | 1.81 m                | <sup>18</sup> Gln-2,4a,4b,NH                                      | <sup>18</sup> Gln-NH,3a,3b,4b                     |
|                     | 3b                |                     | 1.70 m                |                                                                   | <sup>18</sup> Gln-2,3b,4a                         |
|                     | 4a                | 31.8 <sup>f</sup> t | 2.05 m                | <sup>18</sup> Gln-NH <sub>2</sub> a,2,3a,3b                       | <sup>18</sup> Gln-2,3a,4a,NH                      |
|                     | 4b                |                     | 1.97 m                |                                                                   | <sup>18</sup> Gln-3a,3b                           |
|                     | 5                 | 173.6 s             |                       | <sup>18</sup> Gln-NH <sub>2</sub> a,NH <sub>2</sub> b,3a,3b,4a,4b | <sup>18</sup> Gln-NH,NH <sub>2</sub> b,2          |
|                     | NH <sub>2</sub> a |                     | 6.61 s                |                                                                   | <sup>18</sup> Gln-NH <sub>2</sub> b               |
|                     | NH <sub>2</sub> b |                     | 7.06 s                |                                                                   | <sup>18</sup> Gln-NH <sub>2</sub> a,4b            |
|                     | NH                |                     | 7.44 d                |                                                                   | <sup>19</sup> Pheol-NH, <sup>18</sup> Gln-2,3b,4b |
| <sup>19</sup> Pheol | 1a                | 62.8 t              | 3.30 m                | <sup>19</sup> Pheol-2,3a,3b                                       | <sup>19</sup> Pheol-NH                            |
|                     | 1b                |                     | 3.33 m                |                                                                   | <sup>19</sup> Pheol-NH                            |
|                     | 2                 | 52.6 d              | 3.85 m                | <sup>19</sup> Pheol-1a,1b,3a,3b,NH                                | <sup>19</sup> Pheol-NH,3a,3b,5                    |
|                     | 3a                | 36.7 t              | 2.62 dd               | <sup>19</sup> Pheol-1a,1b, 5                                      | <sup>19</sup> Pheol-NH,2                          |
|                     | 3b                |                     | (13.4, 12.0)          |                                                                   |                                                   |
|                     |                   |                     | 2.83 dd               |                                                                   | <sup>19</sup> Pheol-2                             |
|                     |                   |                     | (13.4, 5.0)           |                                                                   |                                                   |
|                     | 4                 | 139.3 s             |                       | <sup>19</sup> Pheol-2,3a,3b,6                                     |                                                   |
|                     | 5                 | 129.4 d             | 7.22 m                | <sup>19</sup> Pheol-3a,3b,5,7                                     | <sup>19</sup> Pheol-2,3b,7                        |
|                     | 6                 | 128.1 d             | 7.18 m                | <sup>19</sup> Pheol-6                                             |                                                   |
| 7                   | 126.0 d           | 7.11 m              | <sup>19</sup> Pheol-5 | <sup>19</sup> Pheol-5                                             |                                                   |
| NH                  |                   | 7.18 m              |                       | <sup>18</sup> Gln-NH,2,                                           |                                                   |
|                     |                   |                     |                       | <sup>19</sup> Pheol-1a,1b,2,3a                                    |                                                   |

<sup>a</sup> Carried out on an AVANCE-400 Bruker instrument; <sup>b</sup> Multiplicity and assignment are from HSQC experiment; <sup>c</sup> Values determined from HMBC experiment; <sup>n</sup>J<sub>CH</sub> = 8 Hz, recycle time 1 s; <sup>d</sup> Selected NOE's from a ROESY experiment; e,f,g,h,i,j,k These signals may interchange.

Table S12. NMR data for TA.Vb <sup>a</sup> (12) in DMSO-*d*<sub>6</sub>.

| Position         | $\delta_C$ , mult. <sup>b</sup> | $\delta_H$ , mult., <i>J</i> (Hz) | LR C-H correlations <sup>c</sup>             | NOE correlations <sup>d</sup>                                |                                                                |
|------------------|---------------------------------|-----------------------------------|----------------------------------------------|--------------------------------------------------------------|----------------------------------------------------------------|
| Ac               | 1                               | 171.1 s                           | Ac-2, <sup>1</sup> Aib-NH                    |                                                              |                                                                |
|                  | 2                               | 23.1 q                            | 1.93 s                                       | <sup>1</sup> Aib-NH,3,4                                      |                                                                |
| <sup>1</sup> Aib | 1                               | 175.9 <sup>e</sup> s              | <sup>2</sup> Ala-NH, <sup>1</sup> Aib-NH,3,4 |                                                              |                                                                |
|                  | 2                               | 55.8 <sup>g</sup> s               | <sup>1</sup> Aib-NH,3,4                      |                                                              |                                                                |
|                  | 3                               | 26.5 <sup>h</sup> q               | 1.35 s                                       | <sup>1</sup> Aib-NH                                          | <sup>1</sup> Aib-NH                                            |
|                  | 4                               | 24.2 <sup>i</sup> q               | 1.32 s                                       | <sup>1</sup> Aib-3                                           | <sup>1</sup> Aib-NH                                            |
|                  | NH                              |                                   | 8.58 s                                       |                                                              | Ac-2, <sup>1</sup> Aib-3,4                                     |
| <sup>2</sup> Ala | 1                               | 174.6 s                           | -                                            | <sup>3</sup> Ala-NH, <sup>2</sup> Ala-2,3                    |                                                                |
|                  | 2                               | 50.9 d                            | 4.00 m                                       | <sup>2</sup> Ala-NH,3                                        | <sup>2</sup> Ala-NH,3                                          |
|                  | 3                               | 16.8 q                            | 1.31 d                                       | <sup>2</sup> Ala-NH,2                                        | <sup>2</sup> Ala-NH,2                                          |
|                  | NH                              |                                   | 8.28 d (5.2)                                 |                                                              | <sup>3</sup> Ala-NH, <sup>2</sup> Ala-2,3                      |
| <sup>3</sup> Ala | 1                               | 174.7 s                           | -                                            | <sup>4</sup> Aib-NH, <sup>3</sup> Ala-2,3                    |                                                                |
|                  | 2                               | 51.2 d                            | 4.00 m                                       | <sup>3</sup> Ala-NH,3                                        | <sup>3</sup> Ala-NH                                            |
|                  | 3                               | 16.1 q                            | 1.33 d                                       | <sup>2</sup> Ala-NH,2                                        | <sup>3</sup> Ala-NH,2                                          |
|                  | NH                              |                                   | 7.71 m                                       |                                                              | <sup>4</sup> Aib-NH, <sup>2</sup> Ala-NH, <sup>3</sup> Ala-2,3 |
| <sup>4</sup> Aib | 1                               | 175.1 s                           |                                              | <sup>5</sup> Aib-NH, <sup>4</sup> Aib-3,4                    |                                                                |
|                  | 2                               | 55.8 <sup>g</sup> s               |                                              | <sup>4</sup> Aib-NH,3,4                                      |                                                                |
|                  | 3                               | 26.5 <sup>h</sup> q               | 1.42 <sup>j</sup> s                          | <sup>4</sup> Aib-NH,4                                        | <sup>4</sup> Aib-NH                                            |
|                  | 4                               | 23.2 <sup>i</sup> q               | 1.39 <sup>k</sup> s                          | <sup>4</sup> Aib-NH,3                                        | <sup>4</sup> Aib-NH                                            |
|                  | NH                              |                                   | 7.83 s                                       |                                                              | <sup>4</sup> Aib-4,3, <sup>3</sup> Ala-NH, <sup>5</sup> Aib-NH |
| <sup>5</sup> Aib | 1                               | 176.0 <sup>e</sup> s              |                                              | <sup>6</sup> Gln-NH, <sup>5</sup> Aib-NH,3,4                 |                                                                |
|                  | 2                               | 56.0 <sup>g</sup> s               |                                              | <sup>5</sup> Aib-NH,3,4                                      |                                                                |
|                  | 3                               | 23.0 <sup>h</sup> q               | 1.44 s                                       | <sup>5</sup> Aib-4,NH                                        | <sup>5</sup> Aib-NH                                            |
|                  | 4                               | 26.5 <sup>i</sup> q               | 1.34 s                                       | <sup>5</sup> Aib-3                                           | <sup>5</sup> Aib-NH                                            |
|                  | NH                              |                                   | 7.55 s                                       |                                                              | <sup>5</sup> Aib-3,4, <sup>4</sup> Aib-NH                      |
| <sup>6</sup> Gln | 1                               | 173.8 s                           |                                              | <sup>7</sup> Aib-NH, <sup>6</sup> Gln-2,3                    |                                                                |
|                  | 2                               | 56.0 d                            | 3.77 m                                       | <sup>6</sup> Gln-NH,3,4a,4b                                  | <sup>6</sup> Gln-NH,3,4a,4b                                    |
|                  | 3                               | 26.2 t                            | 1.97 m                                       | <sup>6</sup> Gln-2,4a,4b,NH                                  | <sup>6</sup> Gln-2,NH                                          |
|                  | 4a                              | 31.5 <sup>f</sup> t               | 2.15 m                                       | <sup>6</sup> Gln-2,3,NH <sub>2</sub> b                       | <sup>6</sup> Gln-2, 4b,NH <sub>2</sub> a                       |
|                  | 4b                              |                                   | 2.23 m                                       |                                                              | <sup>6</sup> Gln-2,4a,NH <sub>2</sub> a                        |
|                  | 5                               | 173.7 s                           |                                              | <sup>6</sup> Gln-3,4a,4b,NH <sub>2</sub> a,NH <sub>2</sub> b |                                                                |
|                  | NH <sub>2</sub> a               |                                   | 7.16 s                                       |                                                              | <sup>6</sup> Gln-4a,4b,NH <sub>2</sub> b                       |
|                  | NH <sub>2</sub> b               |                                   | 6.76 s                                       |                                                              | <sup>6</sup> Gln-NH <sub>2</sub> a                             |
| NH               |                                 | 7.77 m                            |                                              | <sup>6</sup> Gln-2,3                                         |                                                                |
| <sup>7</sup> Aib | 1                               | 176.0 <sup>e</sup> s              |                                              | <sup>8</sup> Aib-NH, <sup>7</sup> Aib-NH,3,4                 |                                                                |
|                  | 2                               | 56.0 <sup>g</sup> s               |                                              | <sup>7</sup> Aib-NH,3,4                                      |                                                                |
|                  | 3                               | 26.3 <sup>h</sup> q               | 1.41 <sup>j</sup> s                          | <sup>7</sup> Aib-NH,4                                        | <sup>7</sup> Aib-NH                                            |
|                  | 4                               | 23.0 <sup>i</sup> q               | 1.35 <sup>k</sup> s                          | <sup>7</sup> Aib-NH,3                                        | <sup>7</sup> Aib-NH                                            |
|                  | NH                              |                                   | 7.86 s                                       |                                                              | <sup>7</sup> Aib-3,4, <sup>8</sup> Aib-NH                      |
| <sup>8</sup> Aib | 1                               | 175.7 s                           |                                              | <sup>9</sup> Aib-NH, <sup>8</sup> Aib-3,4                    |                                                                |
|                  | 2                               | 56.1 <sup>g</sup> s               |                                              | <sup>8</sup> Aib-NH,3,4                                      |                                                                |
|                  | 3                               | 26.5 <sup>h</sup> q               | 1.40 <sup>j</sup> s                          | <sup>8</sup> Aib-NH,4                                        | <sup>8</sup> Aib-NH                                            |
|                  | 4                               | 23.2 <sup>i</sup> q               | 1.37 <sup>k</sup> s                          | <sup>8</sup> Aib-3                                           | <sup>8</sup> Aib-NH                                            |
|                  | NH                              |                                   | 7.59 s                                       |                                                              | <sup>8</sup> Aib-3,4, <sup>7</sup> Aib-NH                      |

Table S12. Cont.

|                   |    |          |              |                                                |                                                    |
|-------------------|----|----------|--------------|------------------------------------------------|----------------------------------------------------|
| <sup>9</sup> Aib  | 1  | 176.4 s  |              | <sup>10</sup> Ser-NH, <sup>9</sup> Aib-3,4,NH  |                                                    |
|                   | 2  | 56.1 g s |              | <sup>9</sup> Aib-NH,3,4                        |                                                    |
|                   | 3  | 26.6 q   | 1.48 s       | <sup>9</sup> Aib-NH,4                          | <sup>9</sup> Aib-NH                                |
|                   | 4  | 22.8 q   | 1.42 s       | <sup>9</sup> Aib-3                             | <sup>9</sup> Aib-NH                                |
|                   | NH |          | 7.79 s       |                                                | <sup>9</sup> Aib-3,4                               |
| <sup>10</sup> Ser | 1  | 170.6 s  |              | <sup>11</sup> Leu-NH, <sup>10</sup> Ser-2      | -                                                  |
|                   | 2  | 58.9 d   | 4.02 m       | <sup>10</sup> Ser-NH                           | <sup>10</sup> Ser-NH,3a,3b, <sup>11</sup> Leu-NH   |
|                   | 3a | 61.2 t   | 3.74 m       | <sup>10</sup> Ser-NH,2                         | <sup>10</sup> Ser-2                                |
|                   | 3b |          | 3.78 m       |                                                | <sup>10</sup> Ser-2                                |
|                   | OH |          | 4.80 t (6.2) | -                                              | <sup>10</sup> Ser-NH                               |
|                   | NH |          | 7.74 m       |                                                | <sup>10</sup> Ser-2,OH                             |
| <sup>11</sup> Leu | 1  | 173.6 s  | -            | <sup>12</sup> Aib-NH                           |                                                    |
|                   | 2  | 51.6 d   | 4.28 t       | <sup>11</sup> Leu-NH,4                         | <sup>11</sup> Leu-NH,5,3a,3b, <sup>13</sup> Pro-5a |
|                   | 3a | 39.2 t   | 1.56 m       | <sup>11</sup> Leu-2,5,6                        | <sup>11</sup> Leu-2,5,6,3b                         |
|                   | 3b |          | 1.70 m       |                                                | <sup>11</sup> Leu-NH,2,3a,6                        |
|                   | 4  | 24.0 d   | 1.73 m       | <sup>11</sup> Leu-5,6                          | <sup>11</sup> Leu-5                                |
|                   | 5  | 20.5 q   | 0.76 d       | <sup>11</sup> Leu-6,3b                         | <sup>11</sup> Leu-2,3a,4                           |
|                   | 6  | 23.0 q   | 0.82 d       | <sup>11</sup> Leu-5,3b                         | <sup>11</sup> Leu-3a,3b                            |
| NH                |    | 7.59 d   |              | <sup>10</sup> Ser-2, <sup>11</sup> Leu-2,3     |                                                    |
| <sup>12</sup> Aib | 1  | 173.0 s  |              | <sup>12</sup> Aib-NH,3,4                       |                                                    |
|                   | 2  | 56.3 g s |              | <sup>12</sup> Aib-NH,3,4                       |                                                    |
|                   | 3  | 26.5 h q | 1.40 s       | <sup>12</sup> Aib-NH,4                         | <sup>12</sup> Aib-NH, <sup>13</sup> Pro-5b         |
|                   | 4  | 23.0 i q | 1.46 s       | <sup>12</sup> Aib-3                            |                                                    |
|                   | NH |          | 7.92 s       |                                                | <sup>12</sup> Aib-3                                |
| <sup>13</sup> Pro | 1  | 173.3 s  | -            | <sup>14</sup> Leu-NH, <sup>13</sup> Pro-2      | -                                                  |
|                   | 2  | 63.0 d   | 4.22 t (8.2) | <sup>13</sup> Pro-3a,4,5b                      | <sup>14</sup> Leu-5, <sup>13</sup> Pro-4,3b        |
|                   | 3a | 28.7 t   | 1.60 m       | <sup>13</sup> Pro-2,5b,4                       | <sup>13</sup> Pro-3b,5a                            |
|                   | 3b |          | 2.24 m       |                                                | <sup>13</sup> Pro-3a,2, 4                          |
|                   | 4  | 26.1 t   | 1.86 m       | <sup>13</sup> Pro-2,5b,5a,3a                   | <sup>13</sup> Pro-2,3b,5a,5b                       |
|                   | 5a | 48.7 t   | 3.44 m       | <sup>13</sup> Pro-3b                           | <sup>13</sup> Pro-2,3a,4, <sup>11</sup> Leu-2      |
| 5b                |    | 3.70 m   |              | <sup>13</sup> Pro-4, <sup>12</sup> Aib-3       |                                                    |
| <sup>14</sup> Leu | 1  | 173.7 s  | -            | <sup>15</sup> Aib-NH                           | -                                                  |
|                   | 2  | 53.6 d   | 3.95 m       | <sup>14</sup> Leu-NH                           | <sup>14</sup> Leu-4,3a,3b,5,6 ,NH                  |
|                   | 3a | 38.7 t   | 1.52 m       | <sup>14</sup> Leu-4,5,6                        | <sup>14</sup> Leu-2,3b,5,6                         |
|                   | 3b |          | 1.78 m       |                                                | <sup>14</sup> Leu-2,3a,5,6,NH,4                    |
|                   | 4  | 24.9 d   | 1.68 m       | <sup>14</sup> Leu-5,6                          | <sup>14</sup> Leu-2,5,6,NH,3b                      |
|                   | 5  | 23.0 q   | 0.92 d (6.0) | <sup>14</sup> Leu-6,4,3a                       | <sup>14</sup> Leu-2,4,3a,3b, <sup>13</sup> Pro-2   |
|                   | 6  | 21.1 q   | 0.82 d       | <sup>14</sup> Leu-5,4                          | <sup>14</sup> Leu-2,3a,3b,4                        |
| NH                |    | 7.72 m   |              | <sup>14</sup> Leu-2, 3b,4                      |                                                    |
| <sup>15</sup> Aib | 1  | 175.4 s  |              | <sup>16</sup> Ile-NH, <sup>15</sup> Aib-NH,3,4 |                                                    |
|                   | 2  | 56.2 g s |              | <sup>15</sup> Aib-NH,3,4                       |                                                    |
|                   | 3  | 26.6 h q | 1.41 s       | <sup>15</sup> Aib-4                            | <sup>15</sup> Aib-NH                               |
|                   | 4  | 24.2 i q | 1.38 s       | <sup>15</sup> Aib-NH,3                         | <sup>15</sup> Aib-NH                               |
|                   | NH |          | 7.63 s       |                                                | <sup>15</sup> Aib-3,4, <sup>16</sup> Ile-NH        |

Table S12. Cont.

|                     |                   |                     |                     |                                                                   |                                                       |
|---------------------|-------------------|---------------------|---------------------|-------------------------------------------------------------------|-------------------------------------------------------|
| <sup>16</sup> Ile   | 1                 | 172.0 s             | -                   | <sup>17</sup> Gln-NH, <sup>16</sup> Ile-2                         | -                                                     |
|                     | 2                 | 59.0 d              | 3.91 m              | <sup>16</sup> Ile-NH, <sup>16</sup> Ile-6,4b,3                    | <sup>16</sup> Ile-NH,6,4b,3, <sup>17</sup> Gln-NH     |
|                     | 3                 | 35.6 d              | 1.88 m              | <sup>16</sup> Ile-2,4a,4b,5,6,NH                                  | <sup>16</sup> Ile-NH,2,5,6                            |
|                     | 4a                | 25.0 t              | 1.20 m              | <sup>16</sup> Ile-2,5,6                                           | <sup>16</sup> Ile-4b                                  |
|                     | 4b                |                     | 1.47 m              |                                                                   | <sup>16</sup> Ile-2,4a,5                              |
|                     | 5                 | 11.5 q              | 0.82 t              | <sup>16</sup> Ile-4a,4b                                           | <sup>16</sup> Ile-4b,3                                |
|                     | 6                 | 15.7 q              | 0.86 d              | <sup>16</sup> Ile-4a,4b,2                                         | <sup>16</sup> Ile-2,3                                 |
|                     | NH                |                     | 6.97 d (6.4)        |                                                                   | <sup>16</sup> Ile-2,3, <sup>15</sup> Aib-NH,3,4       |
| <sup>17</sup> Gln   | 1                 | 171.5 s             |                     | <sup>18</sup> Gln-NH, <sup>17</sup> Gln-2                         |                                                       |
|                     | 2                 | 53.8 d              | 4.02 m              | <sup>17</sup> Gln-NH,4a,4b,3b                                     | <sup>18</sup> Gln-NH, <sup>17</sup> Gln-NH,3a,3b,4a   |
|                     | 3a                | 27.2 t              | 1.85 m              | <sup>17</sup> Gln-2,4a,4b                                         | <sup>17</sup> Gln-NH,2,4b                             |
|                     | 3b                |                     | 1.94 m              |                                                                   | <sup>17</sup> Gln-NH,2,4a                             |
|                     | 4a                | 31.6 <sup>f</sup> t | 2.08 m              | <sup>17</sup> Gln-2                                               | <sup>17</sup> Gln-2,3b                                |
|                     | 4b                |                     | 2.18 m              |                                                                   | <sup>17</sup> Gln-NH,3a                               |
|                     | 5                 | 173.7 s             |                     | <sup>17</sup> Gln-4a,4b                                           |                                                       |
|                     | NH <sub>2</sub> a |                     | 6.72 s              |                                                                   | <sup>18</sup> Gln-NH <sub>2</sub> b                   |
|                     | NH <sub>2</sub> b |                     | 7.15 s              |                                                                   | <sup>18</sup> Gln-NH <sub>2</sub> a,4b                |
|                     | NH                |                     | 7.71 m              |                                                                   | <sup>17</sup> Gln-2,3a,3b,4b, <sup>16</sup> Ile-2     |
| <sup>18</sup> Gln   | 1                 | 170.9 s             |                     | <sup>19</sup> Pheol-NH, <sup>18</sup> Gln-2                       |                                                       |
|                     | 2                 | 53.1 d              | 4.05 m              | <sup>18</sup> Gln-NH,3a,3b,4a,4b                                  | <sup>19</sup> Pheol-NH, <sup>18</sup> Gln-NH,3a,3b,4b |
|                     | 3a                | 27.7 t              | 1.83 m              | <sup>18</sup> Gln-2,4a,4b,NH                                      | <sup>18</sup> Gln-2,3b,4a                             |
|                     | 3b                |                     | 1.70 m              |                                                                   | <sup>18</sup> Gln-NH,2,3a,4a                          |
|                     | 4a                | 31.7 <sup>f</sup> t | 2.05 m              | <sup>18</sup> Gln-NH <sub>2</sub> a,2,3a,3b                       | <sup>18</sup> Gln-3a,3b                               |
|                     | 4b                |                     | 1.97 m              |                                                                   | <sup>18</sup> Gln-NH,NH <sub>2</sub> b,2              |
|                     | 5                 | 173.7 s             |                     | <sup>18</sup> Gln-NH <sub>2</sub> a,NH <sub>2</sub> b,3a,3b,4a,4b |                                                       |
|                     | NH <sub>2</sub> a |                     | 6.65 s              |                                                                   | <sup>18</sup> Gln-NH <sub>2</sub> b                   |
|                     | NH <sub>2</sub> b |                     | 7.11 s              |                                                                   | <sup>18</sup> Gln-NH <sub>2</sub> a,4b                |
| NH                  |                   | 7.48 d (7.6)        |                     | <sup>18</sup> Gln-2,3b,4b                                         |                                                       |
| <sup>19</sup> Pheol | 1a                | 62.7 t              | 3.30 m              | <sup>19</sup> Pheol-2,3a,3b                                       | <sup>19</sup> Pheol-2,3a,3b,5                         |
|                     | 1b                |                     | 3.32 m              |                                                                   | <sup>19</sup> Pheol-2,3a,3b                           |
|                     | 2                 | 52.6 d              | 3.86 m              | <sup>19</sup> Pheol-1a,1b,3a,3b,NH                                | <sup>19</sup> Pheol-NH,1a,1b,3a,3b,5                  |
|                     | 3a                | 36.7 t              | 2.62 dd (13.4, 8.3) | <sup>19</sup> Pheol-1a,1b,2,5                                     | <sup>19</sup> Pheol-NH,1a,1b,2,5                      |
|                     | 3b                |                     | 2.84 dd (13.6, 5.2) |                                                                   | <sup>19</sup> Pheol-1a,1b,2,5                         |
|                     | 4                 | 139.2 s             |                     | <sup>19</sup> Pheol-2,3a,3b,5,7                                   |                                                       |
|                     | 5                 | 129.4 d             | 7.21 m              | <sup>19</sup> Pheol-3a,3b,6,7                                     | <sup>19</sup> Pheol-1a,2,3a,3b,7                      |
|                     | 6                 | 128.2 d             | 7.19 m              | <sup>19</sup> Pheol-5,7                                           |                                                       |
|                     | 7                 | 126.0 d             | 7.13 m              | <sup>19</sup> Pheol-5,6                                           | <sup>19</sup> Pheol-5                                 |
|                     | OH                |                     | 4.71 t (5.6)        |                                                                   | <sup>19</sup> Pheol-NH                                |
|                     | NH                |                     | 7.28 d (8.8)        |                                                                   | <sup>18</sup> Gln-2, <sup>19</sup> Pheol-2,3a,OH      |

<sup>a</sup> Carried out on an AVANCE-400 Bruker instrument; <sup>b</sup> Multiplicity and assignment are from HSQC experiment; <sup>c</sup> Values determined from HMBC experiment; <sup>n</sup>J<sub>CH</sub> = 8 Hz, recycle time 1 s; <sup>d</sup> Selected NOE's from a ROESY experiment; e,f,g,h,i,j,k These signals may interchange.

## Reference

1. Bodo, B.; Rebuffat, S.; El Hajji, M.; Davoust, D. Structure of Trichorzianine A IIIC, an antifungal peptide from *Trichoderma harzianum*. *J. Am. Chem. Soc.* **1985**, *107*, 6011–6017.
2. El Hajji, M.; Rebuffat, S.; Lecommandeur, D.; Bodo, B. Isolation and sequence determination of trichorzianines A antifungal peptides from *Trichoderma harzianum*. *Int. J. Peptide Prot. Res.* **1987**, *29*, 207–215.
3. Rebuffat, S.; El Hajji, M.; Hennig, P.; Davoust, D.; Bodo, B. Isolation, sequence and conformation of seven trichorzianines B from *Trichoderma harzianum*. *Int. J. Peptide. Prot. Res.* **1989**, *34*, 200–210.

© 2013 by the authors; licensee MDPI, Basel, Switzerland. This article is an open access article distributed under the terms and conditions of the Creative Commons Attribution license (<http://creativecommons.org/licenses/by/3.0/>).
